## **Dissecting gating mechanisms of Orai calcium channel paralogs using constitutively active Orai mutants that mimic STIM1-gated state**

Bartłomiej Augustynek<sup>1</sup>, Gergely Gyimesi<sup>1</sup>, Jan Dernič<sup>1</sup>, Matthias Sallinger<sup>2</sup>, Giuseppe Albano<sup>1</sup>, Gabriel J. Klesse<sup>1</sup>, Palanivel Kandasamy<sup>1</sup>, Herwig Grabmayr<sup>2</sup>, Irene Frischauf<sup>2</sup>, Daniel G. Fuster<sup>1</sup>, Christine Peinelt<sup>3</sup>, Matthias A. Hediger<sup>1\*</sup> and Rajesh Bhardwaj<sup>1, 4\*</sup>

<sup>1</sup>Membrane Transport Discovery Lab, Department of Nephrology and Hypertension and Department of Biomedical Research, Inselspital, University of Bern, Freiburgstrasse 15, CH-3010 Bern, Switzerland.

<sup>2</sup>Institute of Biophysics, JKU Life Science Center, Johannes Kepler University Linz, A-4020 Linz, Austria.

<sup>3</sup>Institute of Biochemistry and Molecular Medicine, University of Bern, Bühlstrasse 28, 3012 Bern, Switzerland.

<sup>4</sup>Current address: Signal Transduction Laboratory, National Institute of Environmental Health Sciences, NIH, 111 TW Alexander Drive, NC 27709, USA.

\*For correspondence: Matthias A. Hediger ([matthias.hediger@ibmm.unibe.ch](mailto:matthias.hediger@ibmm.unibe.ch)); Rajesh Bhardwaj ([rajesh.bhardwaj@nih.gov](mailto:rajesh.bhardwaj@nih.gov))

## 1 **Abstract**

2 In humans, there are three paralogs of the Orai Ca<sup>2+</sup> channel, which lie at the heart of the store-operated calcium  
3 entry (SOCE) machinery. While the STIM-mediated gating mechanism of Orai channels is still being actively  
4 investigated, several artificial and natural variants are known to cause constitutive activity of the human Orai1  
5 channel. Surprisingly, little is known about the conservation of the gating mechanism among the different human  
6 Orai paralogs and orthologs in other species. In our work, we show that the mutation corresponding to the  
7 activating mutation H134A in transmembrane helix 2 (TM2) of human Orai1 also activates Orai2 and Orai3, likely  
8 via a similar mechanism. However, this cross-paralog conservation does not apply to the “ANSGA” nexus  
9 mutations in TM4 of human Orai1 which mimic the STIM1-activated state of the channel. Investigating the  
10 mechanistic background of these differences, we identified two positions, H171 and F246 in human Orai1, which  
11 directly control the channel activation triggered by the “ANSGA” mutations in Orai1. Our results shed new light on  
12 these important gating checkpoints and show that the gating mechanism of the Orai channels is affected by  
13 multiple factors that are not necessarily evolutionarily conserved, such as the TM4-TM3 coupling.

## 14 **Introduction**

15 Store-operated calcium entry (SOCE) is a ubiquitous mechanism by which non-excitabile cells regulate basal  
16 cytosolic calcium levels and the replenishment of intracellular Ca<sup>2+</sup> stores. This mechanism is critically important  
17 as calcium participates in many different signaling pathways that play central roles in a wide range of cellular  
18 processes such as cell division, growth, differentiation, metabolism, gene expression, immune function and others.  
19 The SOCE machinery is a multi-component system in which the key components known as Orai proteins are  
20 present in the plasma membrane, where they form the pores of the Ca<sup>2+</sup> release-activated Ca<sup>2+</sup> (CRAC) channels  
21 (Feske et al., 2006; Prakriya et al., 2006; Vig et al., 2006), and the Ca<sup>2+</sup>-sensing STIM proteins are anchored in  
22 the ER membrane, from where they regulate gating and activity of the Orai channels (Liou et al., 2005; Roos et  
23 al., 2005). In humans, there are three known Orai paralogs (Orai1-3; referred to as hO1, hO2 and hO3,  
24 respectively) and two STIM paralogs (STIM1 and STIM2). Furthermore, due to the tissue-specific mRNA splicing,  
25 several splice variants of these proteins have been identified (Berna-Erro, Jardin, Salido, & Rosado, 2017;  
26 Darbellay, Arnaudeau, Bader, Konig, & Bernheim, 2011; Fukushima, Tomita, Janoshazi, & Putney, 2012; Knapp  
27 et al., 2020; Miederer et al., 2015; Niemeyer, 2016; Ramesh et al., 2021; Rana et al., 2015).

28 Several structural studies have shown that the CRAC channel pore comprises a hexameric arrangement of Orai  
29 proteins (Hou, Burstein, & Long, 2018; Hou, Outhwaite, Pedi, & Long, 2020; Hou, Pedi, Diver, & Long, 2012; Liu  
30 et al., 2019). The Orai protein itself has four transmembrane (TM) helices, which are arranged radially around the  
31 central pore that is formed out of six TM1 helices, one from each subunit (Figure 1). Additional twelve TM helices  
32 (6x TM2 and 6x TM3) are arranged in a second, interwoven ring wrapping around the pore-forming TM1 helices.  
33 Finally, six TM4 helices form a third ring at the distal region (Hou et al., 2012). Interfaces between the four helices  
34 TM1-4 show tight packing of amino acid sidechains. The N-terminus of TM1 that extends into the cytoplasm with  
35 residues of unresolved structure encompasses a region (residues 39-59) dispensable for SOCE but critical for  
36 ensuring coupling of hO1-mediated local  $Ca^{2+}$  entry to the activation of NFAT1 (Nuclear Factor of Activated T-  
37 cells) transcription factor (Kar et al., 2021). Notably, the TM4 features a kink at a highly conserved transmembrane  
38 proline residue (Pro245 in hO1), followed by another hinge region with the conserved cytosolic sequence of  
39 LVSHK (L261-K265 in hO1) residues, also called the “nexus” region (Y. Zhou et al., 2016), and finally a C-terminal,  
40 cytosolic extension helix (TM4ext). The first structural studies based on *Drosophila melanogaster* Orai (dOrai)  
41 described TM4ext as being locked in a so-called “latched” state, nearly parallel to the membrane bilayer by coiled  
42 coil interactions of pairs of antiparallel TM4ext helices between neighboring Orai subunits (Hou et al., 2012).  
43 Whether the latched state is a true representation of the native quiescent state of the Orai1 channel is contested  
44 and is discussed later including insights from new structural findings.

45 Mutations in several key regions of the Orai proteins have shown constitutive activity independent of STIM1 gating.  
46 These variants have been instrumental to understand the gating mechanism of Orai channels (Krizova, Maltan, &  
47 Derler, 2019; Yeung, Yamashita, & Prakriya, 2020). The hO1 pore-lining residues F99 and V102 constitute the  
48 hydrophobic gate of the CRAC channel (McNally, Somasundaram, Yamashita, & Prakriya, 2012; Yamashita et al.,  
49 2017) (Figure 1). Pore mutations in TM1, such as V102C, cause constitutive channel opening by physically  
50 removing gating barriers within the pore (McNally et al., 2012; Yamashita et al., 2017). However, several gain-of-  
51 function mutations are known that are not located in the pore, but in the second (TM2-TM3) or third ring (TM4) of  
52 interacting transmembrane helices. These mutant variants are interesting because they can potentially trigger  
53 gating-related conformational changes that are downstream to STIM1-based activation (Krizova et al., 2019;  
54 Yeung, Yamashita, et al., 2020). Unexpectedly, mutation of residue H134 in hO1, which is located in the TM2  
55 region (second ring of TM helices), constitutively activates hO1 as well as *Drosophila melanogaster* Orai (dOrai)  
56 and retains all hallmark properties of CRAC channel activity, such as  $Ca^{2+}$  selectivity (Frischauf et al., 2017; Hou

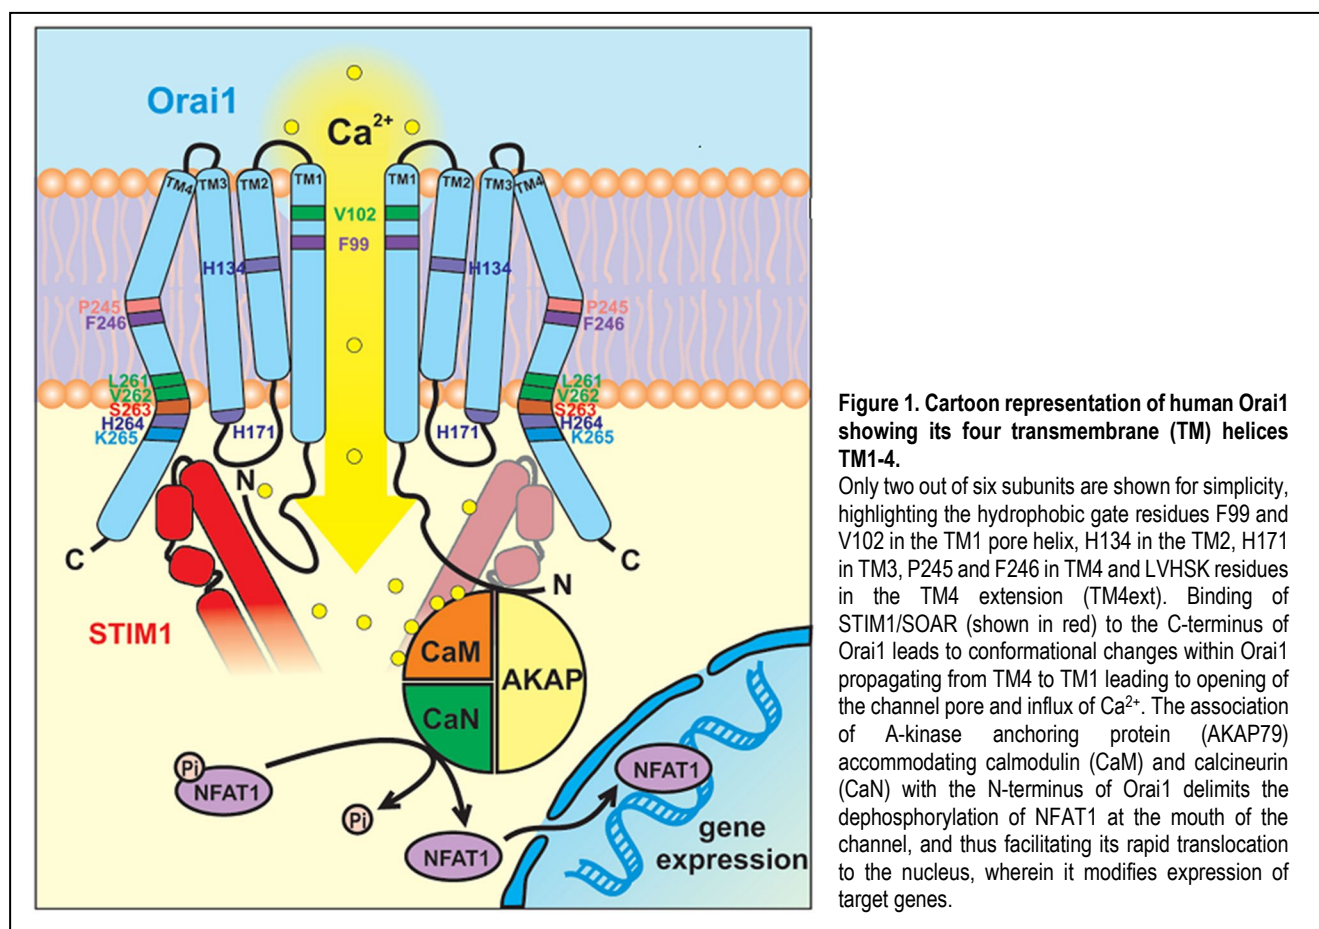

57 et al., 2018; Yeung et al., 2018). The H134 position in hO1 (H206 in dOrai) seems to constitute a “steric brake”,  
58 which, when replaced by a residue with a smaller sidechain, causes a significant dilation of the pore (Frischauf et  
59 al., 2017; Hou et al., 2018; Hou et al., 2020; Yeung et al., 2018) and “rotation” of the TM1 helix (Bulla et al., 2019;  
60 Frischauf et al., 2017; Hou et al., 2018; Yeung et al., 2018). The latter in turn, causes a rearrangement of the pore-  
61 lining hydrophobic gate, formed by residues F99 and V102, which is measured as the rotation of the F99 phenyl  
62 ring relative to the axis of the pore (Yeung et al., 2018). Opening of the pore via the rearrangement of F99 seems  
63 to be mediated by a so-called sulfur-aromatic latch, where M101 of a given hO1 subunit contacts F99 of the  
64 neighboring hO1 subunit, stabilizing the open channel conformation. Conversely, in the closed state, M101 forms  
65 contacts with F187 (on TM3), highlighting the role of TM1-TM3 crosstalk in channel gating (Bonhenry, Schober, &  
66 Schindl, 2021; Yeung, Ing, Yamashita, Pomes, & Prakriya, 2020). Other TM1-TM3 contacts towards the  
67 cytoplasmic side have also been shown to be essential for proper channel gating (Dong et al., 2019; Liu et al.,  
68 2019; Y. Zhou et al., 2016). On the other hand, the rotation of the TM1 helix was not observed in the molecular  
69 dynamics (MD) simulations of the hO1-H134A homology model (Frischauf et al., 2017). Further, the TM1 helix  
70 rotation was also not apparent from a recent 3.3 Å resolution cryo-EM structure of dOrai-H206A (corresponding to



71 H134 in hOrai1). However, the displacement of F171 (corresponding to hO1 F99) away from the pore was  
72 observed, which likely resulted from the rigid-body outward movement of each dOrai-H206A subunit (Hou et al.,  
73 2020). Overall, a common consensus among these findings suggests that sustained Orai1 channel opening  
74 requires the displacement of F99 away from the pore.

75 More enigmatic is the mechanism of how mutations in the third ring (TM4) lead to constitutive channel opening.  
76 The notorious P245L mutation of hO1 was found as a gain-of-function mutation in patients with tubular aggregate  
77 myopathy (TAM) (Liu et al., 2019; Nesin et al., 2014), rendering the hO1 channel constitutively active, albeit with  
78 a significant loss of selectivity towards  $\text{Ca}^{2+}$  (Liu et al., 2019; Palty, Stanley, & Isacoff, 2015). Structure of P288L  
79 dOrai (corresponding to P245L hO1) shows a clear straightening of the kink in TM4 at P288 (Liu et al., 2019).  
80 Nevertheless, the relevance of this conformational change has been contested due to establishment of extensive  
81 artificial contacts between Orai hexamers, present only in protein crystals but not in physiological conditions, and  
82 to the fact that it shows an apparently closed pore geometry (Hou et al., 2020). Interestingly, a non-natural mutant  
83 variant of TM4 in hO1, in which the “LVSHK” hinge sequence is replaced by “ANSGA”, reproduces all hallmark  
84 properties of CRAC current ( $I_{\text{CRAC}}$ ), including inward rectification and  $\text{Ca}^{2+}$ -selectivity. This contrasts with the P245L  
85 variant (Y. Zhou et al., 2016). Thus, the ANSGA substitution, being closest to the STIM1-binding site in TM4ext  
86 (Frischauf et al., 2009; Z. Li et al., 2011; Muik et al., 2008; Navarro-Borelly et al., 2008; Palty et al., 2015; Park et  
87 al., 2009; Tirado-Lee, Yamashita, & Prakriya, 2015; Y. Zhou et al., 2016), makes this variant a potentially useful  
88 tool to study STIM1-like activation of Orai channels. However, currently no structural information is available about  
89 the ANSGA variant and its gating mechanism.

90 One of the interesting features of the X-ray-based structures of dOrai is that the TM4ext helices protrude either in  
91 a “latched” (“quiescent”) (Hou et al., 2012) or an “unlatched” state, where the latter state displays the dissociation  
92 of the TM4ext bundles, a clear straightening of the kinks in TM4 at both the P288 and the nexus position, and  
93 rupture of contacts between TM3 and TM4 (Hou et al., 2018; Liu et al., 2019; Y. Zhou et al., 2019). Importantly, it  
94 was concluded that the latched state prevents pore opening, and unlatching is a necessary, but not sufficient  
95 condition of channel opening (Hou et al., 2018). However, the physiological relevance of these TM4ext bundles  
96 has recently been disputed, as they might be artificially stabilized by crystal contacts, and therefore the role of  
97 unlatching in channel activation and pore opening became less clear (Y. Zhou et al., 2019). Further, the  
98 interactions between plasma membrane targeted C-terminal TM4ext peptides of hO1 or hO3 could not be  
99 observed in a recent FRET-based study (Baraniak et al., 2021) which further questions the formation of antiparallel

100 TM4ext interaction pairs between neighboring Orai subunits as reported in the closed dOrai structure (Hou et al.,  
101 2012). Future structural studies addressing the closed state of the Orai channel should settle this debate. In context  
102 of the channel activation pathway, in particular, TM3-TM4 contacts were proposed to be integral parts (Liu et al.,  
103 2019; Y. Zhou et al., 2016; Y. Zhou et al., 2019), since cross-linking studies of positions L174-L261 showed that  
104 TM3 and TM4 can also form contacts in the STIM1-activated state, leading to further enhancement of the CRAC  
105 current (Y. Zhou et al., 2016). Consistently, disruption of a cluster of hydrophobic residues between TM3 and TM4  
106 (L174, F178 in TM3 and L261, F257 in TM4) attenuates channel activation (Liu et al., 2019; Y. Zhou et al., 2016).  
107 Indeed, cryo-EM studies, which avoid the formation of crystal contacts, have reported an apparently semi-  
108 unlatched state of dOrai P288L (Dong et al., 2019; Liu et al., 2019; Y. Zhou et al., 2019), and also an open state  
109 of H206A mutant with intact TM3-TM4 contacts (Hou et al., 2020). It is important to mention that while the relevance  
110 of TM4ext latching and unlatching is still debated, dissociation of TM4ext bundles is expected since known  
111 interaction sites of Orai1 with STIM1 (L273 and L276) lie in the coiled-coil TM4ext region of Orai (Frischauf et al.,  
112 2009; Z. Li et al., 2011; Muik et al., 2008; Navarro-Borelly et al., 2008; Palty et al., 2015; Tirado-Lee et al., 2015).  
113 Nevertheless, it is intriguing to speculate whether and how the ANSGA substitution may interfere with the TM4ext  
114 regions or TM3-TM4 contacts. The contacts between cytoplasmic regions of TM1 and TM3 may also be essential  
115 for the constitutive activity of hO1-ANSGA channel (Y. Zhou et al., 2016). In fact, the K85E and L174D hO1  
116 mutations that abrogate  $I_{CRAC}$  (Lis, Zierler, Peinelt, Fleig, & Penner, 2010; McNally, Somasundaram, Jairaman,  
117 Yamashita, & Prakriya, 2013; Y. Zhou et al., 2016) likely by disrupting the TM1-TM3 and TM3-TM4 cytoplasmic  
118 contacts, respectively (Dong et al., 2019; Liu et al., 2019; Y. Zhou et al., 2016), not only abolished the constitutive  
119 activity of ANSGA but also that of the P245L mutant channel (Derler et al., 2018; Y. Zhou et al., 2016). It remains  
120 puzzling why hO1-ANSGA shows CRAC-like activation while P245L does not, despite their proximity and their  
121 location on TM4, indicating that factors other than unlatching or TM4 rearrangement are also affecting the  
122 selectivity of ion permeation through the Orai hexamer.

123 Although all three hOrai paralogs undergo STIM1-mediated activation of CRAC currents, hO2 and hO3 generate  
124 2-3 fold lower currents compared to hO1 (Frischauf et al., 2009; Lis et al., 2007; Mercer et al., 2006). Certain  
125 regions of the Orai channels are responsible for paralogue-specific differences in gating by STIM1 (Fahrner et al.,  
126 2018). Deletion of more than 74 residues from the N-terminus of hO1 completely abolishes STIM1-gated CRAC  
127 currents and results in significantly attenuated association of hO1 with STIM1 (Derler et al., 2013; Z. Li et al., 2007;  
128 Lis et al., 2010; McNally et al., 2013; Muik et al., 2008; Park et al., 2009; Zheng et al., 2013). Interestingly, N-

129 terminal deletion mutants of hO1 can be rescued by replacing loop2 of hO1 (the cytoplasmic region between TM2  
130 and TM3) with that of hO3 (Fahrner et al., 2018). This is surprising given the fact that loop2 is very conserved  
131 among Orai paralogs, and the effect of loop2 replacement can be narrowed down to the replacement of 5 amino  
132 acids from hO1 with the corresponding ones from hO3 (N147H/K161H/E162Q/E166Q/H171Y), reproducing the  
133 rescue effect (Fahrner et al., 2018). These results indicate an extensive crosstalk between TM1 and loop2, which,  
134 considering the role of TM1-TM3 contacts in the transduction of gating signals, likely shape paralog-specific  
135 differences in gating among human Orai channels. Another recent study elucidates the paralog-specific function  
136 of hO1 vs. hO3 gating checkpoints in TM3 (Tiffner et al., 2021). Additional paralog-specific differences in gating of  
137 human Orais stem from the differential interaction of their C-termini with STIM1 (Alansary, Bogeski, & Niemeyer,  
138 2015; Baraniak et al., 2021; Frischauf et al., 2009; S. Li et al., 2019; Niu et al., 2020). Despite these differences in  
139 gating between Orai paralogs, the effects of mutations causing constitutive activity mimicking a STIM1-bound state  
140 on various Orai channels have not been studied in detail.

141 The main objective of the current study was to generate new insights into the gating mechanisms of Orai channels  
142 and to investigate if there are paralog-specific differences in conformational rearrangements that are linked to Orai  
143 channel gating. To address this, we used the H134A and ANSGA hO1 mutants that are reported to largely mimic  
144 the STIM1-gated state of the Orai1 channel (Frischauf et al., 2017; Yeung et al., 2018; Y. Zhou et al., 2016). We  
145 constructed their corresponding hO2 and hO3 variants and assessed their constitutive activity by Ca<sup>2+</sup> imaging on  
146 Fluorometric Imaging Plate Reader (FLIPR), electrophysiology as well as NFAT1 nuclear translocation assays.  
147 Herein, we show that the conformational coupling between TM2 and TM1 is conserved among all three human  
148 Orai paralogs. We investigated whether and how, based on their location, the ANSGA and other residues in Orai  
149 paralogs adjacent to the ANSGA sequence might interfere with the TM4ext regions or TM3-TM4 contacts, and  
150 thus with the channel activation *per se*. Our data reveal that the TM4-TM3 coupling implicated in the activation of  
151 hO1 likely works differently for the paralogs hO2 and hO3. Overall, our data provides novel insights into the gating  
152 mechanisms of Orai channels.

153 **Results**

154 **The human Orai1 TM2 H134A as well as TM3 F187C corresponding mutations in Orai2 and Orai3 renders**  
 155 **them constitutively active**

156 The hO1 TM2 residue H134 (**Figure 2A**), which makes the channel constitutively active when mutated to alanine  
 157 by displacing the TM1-F99 residue away from the pore axis, is highly conserved across multiple species (mouse,  
 158 *Xenopus* and *Drosophila*) as well as in the hO2 and hO3 paralogs (**Figure 2B**). In order to investigate whether the  
 159 H134A corresponding mutation in hO2 and hO3 mimics the constitutive activation effect, we generated hO2-  
 160 H108A and hO3-H109A mutants and expressed them in STIM1/STIM2 double knock-out (S1/S2 DKO) HEK293  
 161 cells for electrophysiological analysis. The S1/S2 DKO HEK293 cells were generated in-house using the  
 162 CRISPR/Cas9 technique specifically to exclude the canonical STIM-dependent activation of Orai channels. The

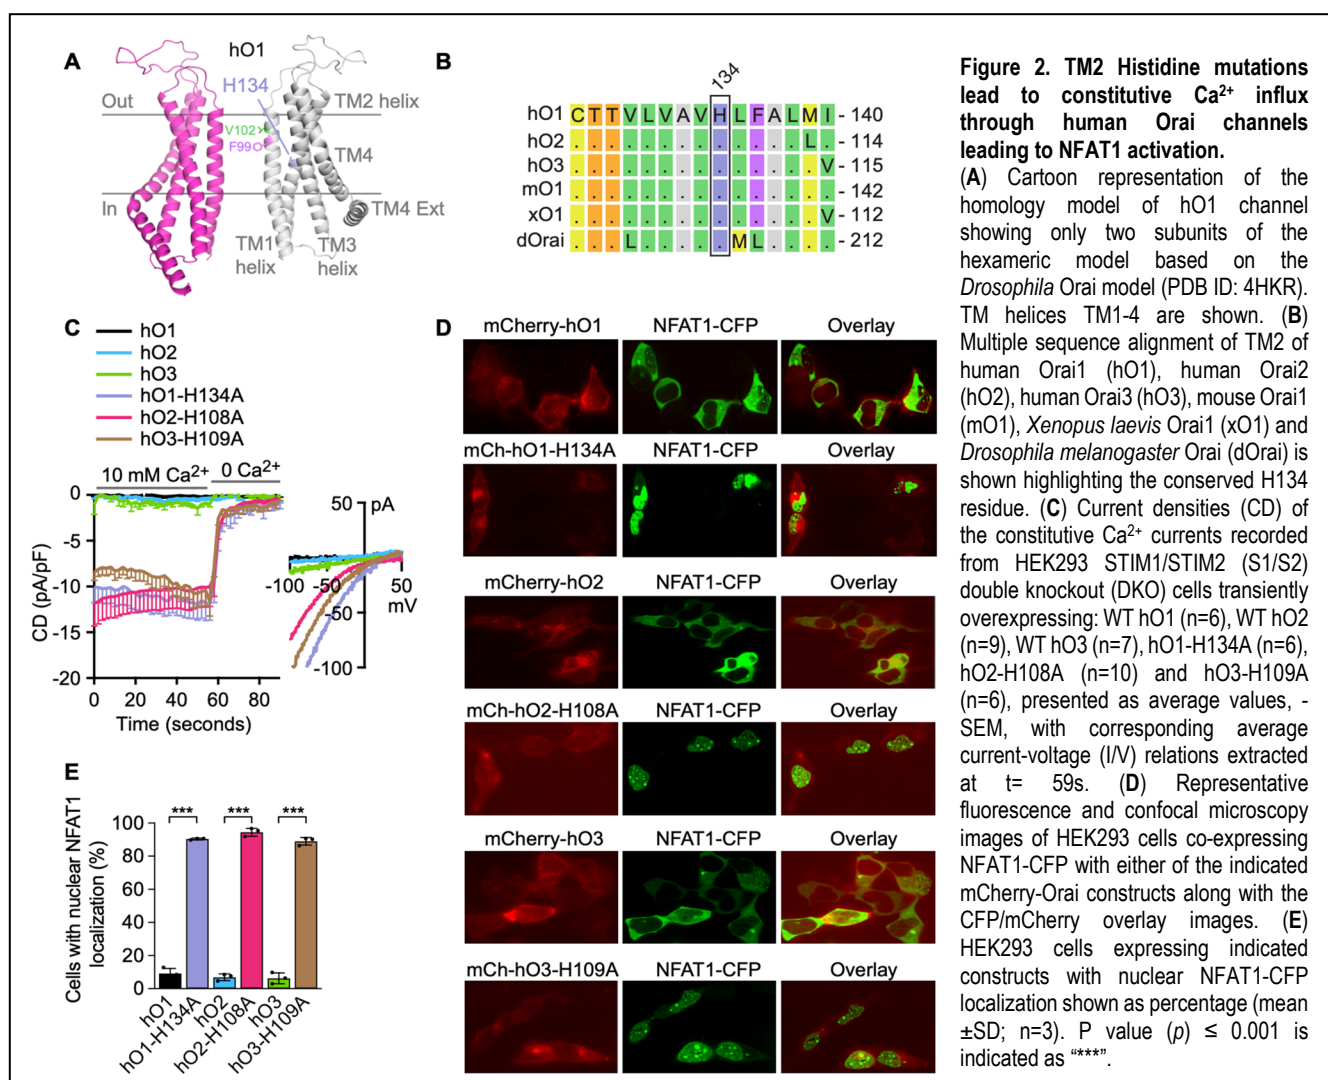

163 successful ablation of S1 and S2 proteins was confirmed at mRNA and protein levels (**Figure 2—figure**  
164 **supplement 1A,B**). As expected, SOCE was nearly completely absent in the DKO cells (**Figure 2—figure**  
165 **supplement 1C,D**). When expressed in these cells, the hO2-H108A and hO3-H109A mutants showed constitutive  
166 currents similar to hO1-H134A, which disappeared upon removal of Ca<sup>2+</sup> from the bath solution, whereas the wild  
167 type (WT) Orai channels did not show any constitutive activity (**Figure 2C**). Consistent with this finding, nearly  
168 90% of HEK293 cells expressing either hO1-H134A, hO2-H108A or hO3-H109A mutant displayed translocation  
169 of the CFP labeled NFAT1 transcription factor from cytosol to nuclei, whereas only less than 10% of the cells  
170 expressing WT Orai proteins showed nuclear translocation of NFAT1 (**Figure 2D,E**). Overall, these results suggest  
171 that the substitution of H108 of hO2 and H109 of hO3 by alanine exerts a similar constitutive activation effect as  
172 known for the hO1-H134A mutant.

173 Recently, it has been proposed that intersubunit F99-M101 interactions support the hO1 channel opening, whereas  
174 intersubunit M101-F187 (TM1-TM3) interactions facilitate the closing of the channel (Bonhenry et al., 2021; Yeung,  
175 Ing, et al., 2020). Our investigations of these interactions using MD simulations revealed that H134S/H134A hO1  
176 open channel mutants have a higher frequency of intersubunit F99-M101 contacts than WT, whereas no difference  
177 was observed in M101-F187 interactions (**Figure 2—figure supplement 2C,D,E**). These observations are in line  
178 with the recently published findings on dOrai-H206Q/C channels (Yeung, Ing, et al., 2020). In view of the role of  
179 M101-F187 interactions in maintaining channel closure (Yeung, Ing, et al., 2020); using the FLIPR-based Ca<sup>2+</sup>  
180 imaging technique, we first validated the earlier published finding that F187C substitution in hO1 results in its  
181 constitutive activation (Yeung et al., 2018) (**Figure 2—figure supplement 2F,G**). Next, given the conservation of  
182 M101 and F187 residues in hO2 and hO3 (**Figure 2—figure supplement 2A,B**), we investigated if the mutations  
183 corresponding to hO1 F187C, F161C and F162C in hO2 and hO3, respectively, also lead to their constitutive  
184 activation. Our results showing the constitutive activation of hO2-F161C and hO3-F162C (**Figure 2—figure**  
185 **supplement 2H,I**) suggest that intersubunit TM1-TM3 (M101-F187) interactions facilitating the closed state of the  
186 hO1 channel (Bonhenry et al., 2021; Yeung, Ing, et al., 2020) may also be conserved in hO2 and hO3.

187 **The substitution of Orai1 nexus LVSHK residues with ANSGA results in constitutive activation of human**  
188 **and *Xenopus* Orai1 but not human Orai2, Orai3 and *Drosophila* Orai**

189 Next, we investigated the only other known Ca<sup>2+</sup>-selective, constitutively active nexus mutant of hO1 where the  
190 LVSHK residues (positions 261-265 in hO1), forming a nexus connecting TM4 with its cytoplasmic C-terminal

191 extension, are mutated to ANSGA residues (**Figure 3A**). The LVSHK nexus motif is completely conserved in hO1,  
192 mouse Orai1 (mO1), *Xenopus laevis* Orai1 (xO1) and dOrai, whereas the serine at 263 residue position in  
193 corresponding hO2 and hO3 sequences is substituted with arginine and alanine, respectively (**Figure 3B**). The  
194 hO1-ANSGA nexus mutant expressed in S1/S2 DKO cells, as expected, exhibited constitutive influx of Ca<sup>2+</sup> in  
195 both Ca<sup>2+</sup> imaging (**Figure 3C,D**) and patch-clamp measurements (**Figure 3G**). Strikingly, analogous experiments  
196 with the corresponding hO2-ANSGA or hO3-ANSGA variants revealed no constitutive entry of Ca<sup>2+</sup> through these  
197 mutants (**Figure 3E,F,G**). Consistently, the hO2-ANSGA or hO3-ANSGA expression did not result in any  
198 significant increase in the percentage of HEK293 cells with nuclear translocation of NFAT1 compared to the  
199 expression of their WT counterparts (**Figure 3J,K**). However, nearly 90% of cells expressing hO1-ANSGA showed  
200 nuclear translocation of NFAT1 compared to less than 10% for WT hO1 (**Figure 3J,K**). Next, we investigated  
201 whether introduction of the ANSGA mutation in the nexus region of hO1 orthologues found in lower organisms can  
202 render them constitutively active. Despite the conserved LVSHK motif in both xO1 and dOrai, only the xO1-ANSGA  
203 mutant exhibited constitutive Ca<sup>2+</sup> entry (**Figure 3H**) while dOrai remained inactive similarly to its WT counterpart  
204 (**Figure 3I**). In order to rule out the possibility that introduction of the ANSGA mutation compromised surface  
205 expression of hO2-ANSGA, hO3-ANSGA and dOrai-ANSGA, we introduced an additional, well-established  
206 mutation (corresponding to V102A pore-opening mutation of hO1) directly into the TM1 of these mutants. Indeed,  
207 the introduction of V76A, V77A and V174A in hO2-ANSGA, hO3-ANSGA and dOrai-ANSGA, respectively, resulted  
208 in constitutive Ca<sup>2+</sup> influx through these mutants, suggesting that ANSGA mutation does not affect their cell surface  
209 localization or proper assembly (**Figure 3—figure supplement 1A,B,C**). Altogether, these data establish that  
210 mutation of nexus residues to ANSGA does not lead to constitutive activation of hO2, hO3 and dOrai, but  
211 constitutively activates hO1 and xO1.



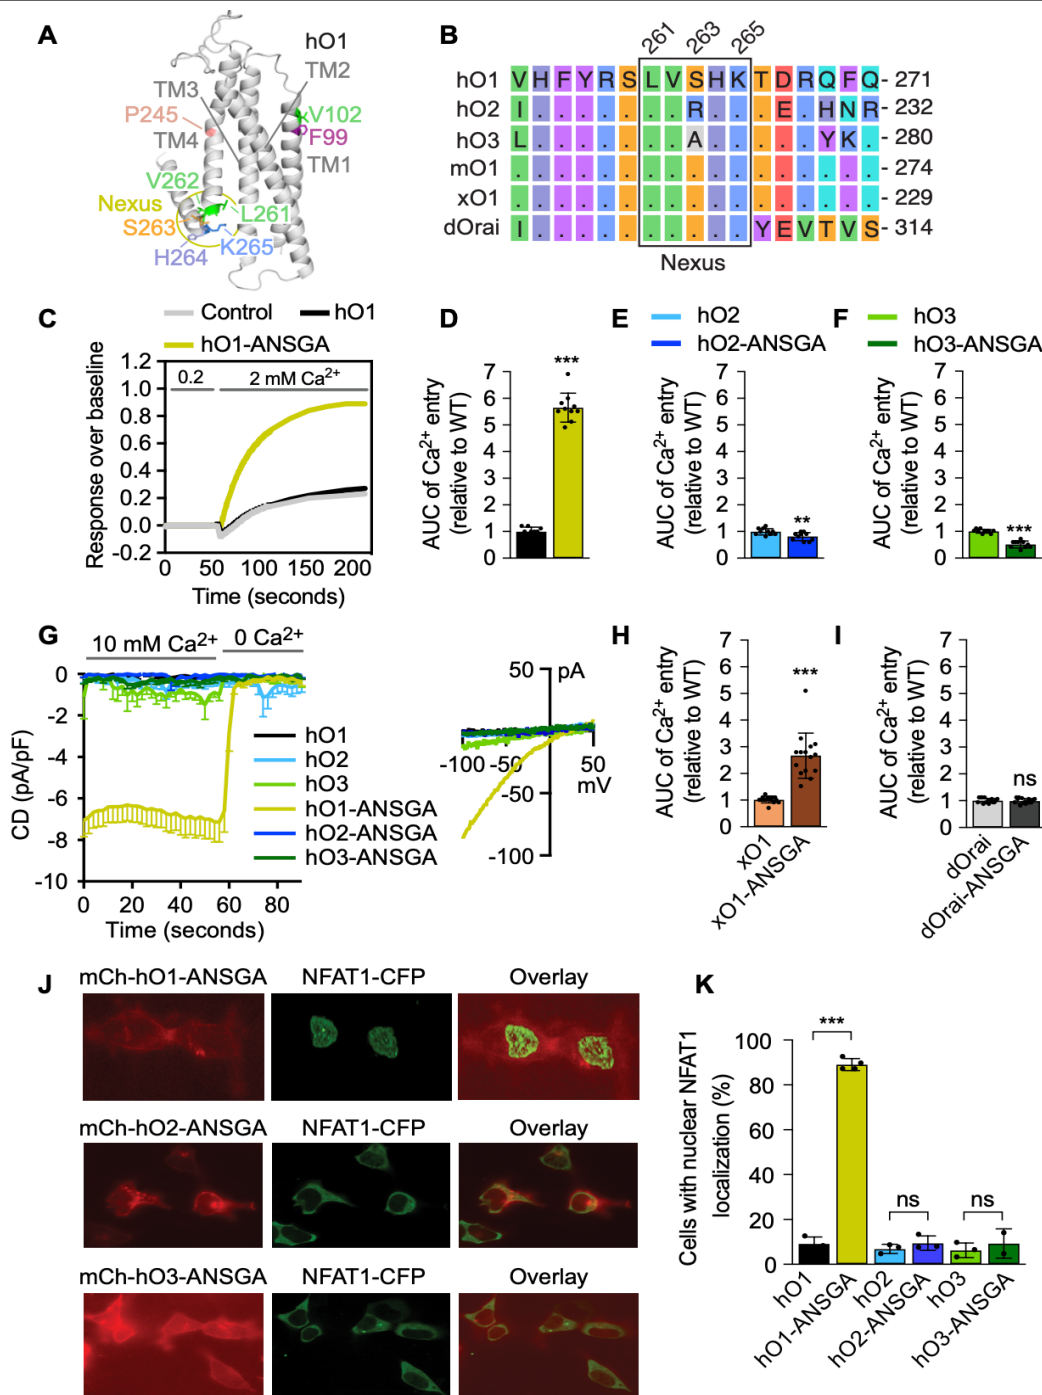

**Figure 3. ANSGA substitution of the Orai nexus residues does not exert a constitutive activation effect among Orai homologs.**

(A) Cartoon representation of a single subunit of hO1 homology model depicting indicated residues along with the LVSHK (261-265) nexus residues. (B) Multiple sequence alignment of TM3 of hO1, hO2, hO3, mO1, xO1 and dOrai is shown, highlighting the conserved LVXHK residues. (C) Representative constitutive Ca<sup>2+</sup> entry traces recorded from HEK293 S1/S2 DKO cells transfected with mCherry control vector, WT hO1 and hO1-ANSGA constructs with initial baseline recording in 0.2 mM CaCl<sub>2</sub>, followed by addition of 2 mM CaCl<sub>2</sub>. The quantified AUC of Ca<sup>2+</sup> entry peak from HEK293 S1/S2 DKO cells expressing (D) WT hO1 and hO1-ANSGA, (E) WT hO2 and hO2-ANSGA and (F) WT hO3 and hO3-ANSGA (mean ± SD; n=10).  $p \leq 0.001$  is indicated as “\*\*\*\*” and  $0.001 < p \leq 0.01$  is indicated as “\*\*\*”. (G) Current densities (CD) of the constitutive Ca<sup>2+</sup> currents recorded from HEK293 S1/S2 DKO cells transiently overexpressing: WT hO1 (n=6), WT hO2 (n=9), WT hO3 (n=7), hO1-ANSGA (n=23), hO2-ANSGA (n=6) and hO3-ANSGA (n=7), presented as average values, -SEM, with corresponding average current-voltage (I/V) relations extracted at t= 59s. (H) AUC of the constitutive Ca<sup>2+</sup> entry traces from WT xO1 and xO1-ANSGA expressing HEK293 cells (mean ± SD; n=15).  $p \leq 0.001$  is indicated as “\*\*\*\*”. (I) AUC of the constitutive Ca<sup>2+</sup> entry traces from S1/S2 DKO HEK293 cells expressing WT dOrai and dOrai-ANSGA constructs (mean ± SD; n=15).  $p \geq 0.05$  is indicated as “ns”. (J) Representative confocal microscopy images of HEK293 cells co-expressing NFAT1-CFP with either of the indicated mCherry-Orai-ANSGA constructs along with the CFP/mCherry overlay images. (K) HEK293 cells expressing indicated constructs with nuclear NFAT1-CFP localization shown as percentage (mean ± SD; n ≥ 3).  $p \leq 0.001$  is indicated as “\*\*\*\*” and  $p \geq 0.05$  is indicated as “ns”.

213 **The H171Y/F, but not H171A substitution in the TM3 helix of human Orai1-ANSGA abolishes its constitutive**  
 214 **activity**

215 We next targeted the molecular determinants that lead to these paralog-specific differences in ANSGA  
 216 substitution-mediated constitutive activity of Orai channels. For this purpose, we looked in our homology-based  
 217 model of hO1 for the conservation of residues that are in close proximity to the nexus. We identified a histidine  
 218 residue at position 171 of hO1 that directly faces the nexus region and is conserved in mO1 and xO1, but is  
 219 substituted by a tyrosine residue in hO2, hO3 and dOrai (**Figure 4A,B**). Based on this and in light of the previous

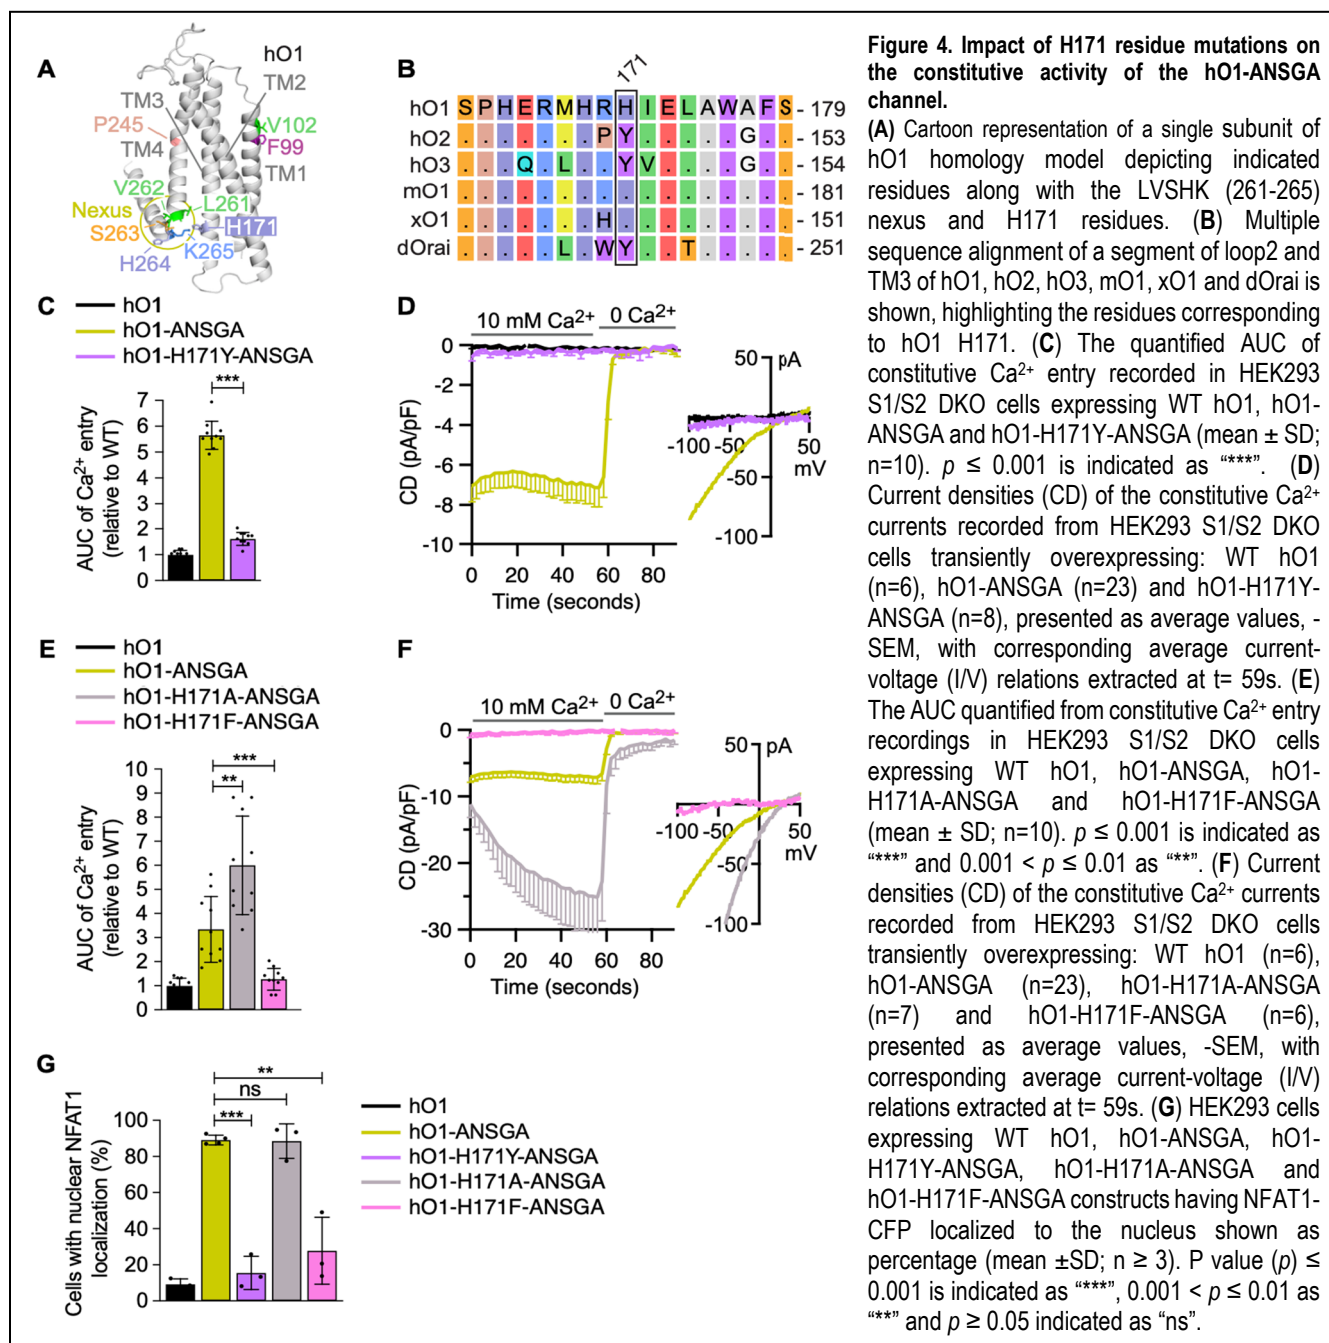

220 finding that ANSGA substitution of nexus constitutively activates hO1 and xO1 (**Figure 3D,H**), but not hO2, hO3  
221 and dOrai (**Figure 3E,F,I**), we have hypothesized that the H171Y mutation could interfere with the constitutive  
222 activity of the hO1-ANSGA mutant. Indeed, H171Y substitution resulted in complete attenuation of the constitutive  
223 activity of hO1-ANSGA channel (**Figure 4C,D**). To investigate whether mislocalization or altered assembly were  
224 the reasons for abolished constitutive activity of the hO1-H171Y-ANSGA channel, we used surface biotinylation  
225 experiments and confirmed the expression of hO1-H171Y-ANSGA in the plasma membrane (**Figure 4—figure**  
226 **supplement 1A**). In addition, the introduction of the V102C pore mutation rescued the constitutive activity of the  
227 hO1-H171Y-ANSGA channel and ensured the correct assembly of the channel (**Figure 4—figure supplement**  
228 **1B**). We next tested further substitutions of H171, of which the H171F, but not H171A abolished the constitutive  
229 activity of the hO1-ANSGA mutant (**Figure 4E,F**). Consistently, both the H171Y and the H171F but not the H171A  
230 substitutions prevented the nuclear translocation of NFAT1 (**Figure 4G, Figure 4—figure supplement 1C**).

### 231 **The H171Y substitution in human Orai1-ANSGA affects the $\alpha$ -helical propensity of the TM4 helix extension** 232 **as well as the local coupling between TM3 and TM4**

233 We sought to understand the mechanism behind H171Y-mediated inhibition of the constitutive activity of the hO1-  
234 ANSGA channel. We hypothesized that the H171Y substitution may disrupt the ANSGA-mediated proposed flexion  
235 of the nexus hinge (Y. Zhou et al., 2016) and/or TM4-TM3 coupling (Liu et al., 2019; Y. Zhou et al., 2016; Y. Zhou  
236 et al., 2019) within hO1-ANSGA, both of which are considered critical for the constitutive activity of hO1-ANSGA.  
237 No difference in the helicity of the TM4 helix region (residues 240-250), encompassing the proline bend caused  
238 by P245 was observed in the molecular dynamics (MD) simulations of hO1-ANSGA and hO1 WT (**Figure 5A,**  
239 **Figure 5—figure supplement 1A**). Contrariwise, the tubular aggregate myopathy (TAM)-associated P245L  
240 mutant showed a significantly higher  $\alpha$ -helical propensity of the TM4 fragment upstream of L245 (residues 241-  
241 244) compared to WT (**Figure 5—figure supplement 1A**). On the other hand, we observed a modest increase in  
242 the  $\alpha$ -helical propensity of the nexus hinge upon the substitution of the nexus residues to ANSGA (**Figure 5B**).  
243 Further, our MD simulations reveal that H171Y but not H171A substitution led to a decrease in  $\alpha$ -helical propensity  
244 of residues 265 to 267 of hO1-ANSGA channel (**Figure 5B**), which may contribute to the loss of constitutive activity  
245 of the hO1-H171Y mutant ANSGA channel.

246 Next, we addressed whether ANSGA and further H171Y/A substitutions within hO1-ANSGA affect the frequency  
247 of contacts between known, functionally important, interacting residues at the interface of TM3 and TM4, namely,

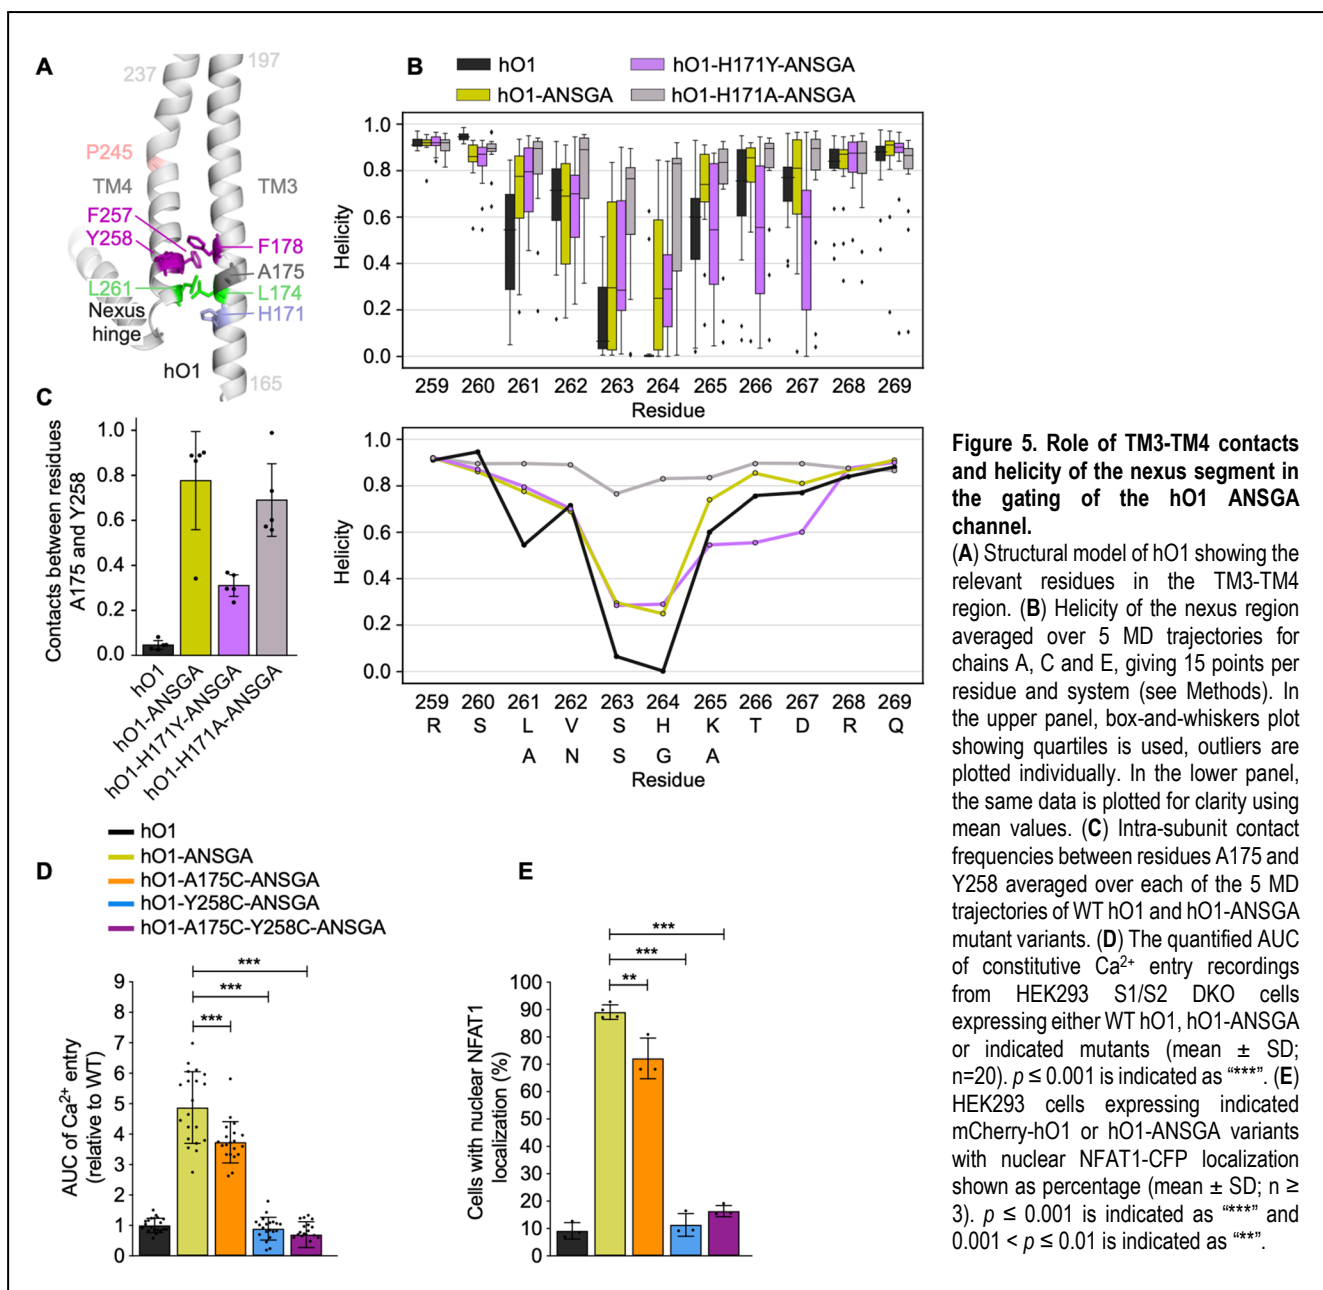

248 L174(TM3)-L/A261(TM4) and F178(TM3)-F257(TM4) (Figure 5A). No differences could be observed in the  
 249 contact frequencies between these residues in the MD simulations of hO1 WT, hO1-ANSGA, hO1-H171Y-ANSGA  
 250 and hO1-H171A-ANSGA (Figure 5—figure supplement 1B). Interestingly, further screening and contact analysis  
 251 led to the identification of different contact frequencies between A175 (TM3) and Y258 (TM4). The MD simulations  
 252 of the hO1-ANSGA channel showed higher A175-Y258 contact frequency compared to the WT channel.  
 253 Substitution of H171 with tyrosine but not alanine residue resulted in a reduction of A175-Y258 contacts (Figure  
 254 5C) indicating that the H171Y substitution attenuates the local coupling between TM3 and TM4 in the hO1-ANSGA  
 255 channel. In line with the previous findings of others, the L174D mutation in the hO1-ANSGA channel abolished its

256 constitutive activity (Y. Zhou et al., 2016). Moreover, both F178A and F257A substitutions, reported to affect the  
257 STIM1-mediated gating of the WT Orai1 channel (Liu et al., 2019), diminished the constitutive activity of the hO1-  
258 ANSGA channel, further highlighting the importance of these residues in the channel activation (**Figure 5—figure**  
259 **supplement 1C**). Finally, we addressed whether A175 and Y258 are indispensable for the hO1-ANSGA channel  
260 activation. While the A175C substitution led to only a small reduction, Y258C resulted in complete loss of  
261 constitutive activity of the hO1-ANSGA channel without affecting the cell surface localization (**Figure 5D, Figure**  
262 **5—figure supplement 1D**). As expected, the A175C-Y258C mutant of the hO1-ANSGA channel did not exhibit  
263 constitutive activation. The corresponding effect was observed in NFAT1 activation experiments, wherein  
264 expression of hO1-A175C-ANSGA led to only small decrease in percentage of cells showing nuclear translocation  
265 of NFAT1 compared to hO1-ANSGA. Conversely, the expression of hO1-Y258C-ANSGA and hO1-A175C-Y258C-  
266 ANSGA mutants reduced the number of cells with nuclear NFAT1 to background level, *i.e.*, the cells expressing  
267 hO1 WT (**Figure 5E, Figure 5—figure supplement 1E**).

268 We furthermore investigated whether the pore helix rotation reported for the dOrai mutant corresponding to hO1  
269 H134S (Yeung et al., 2018) or pore dilation reported for human H134A Orai1 mutant (Frischauf et al., 2017), could  
270 also be observed in the hO1-ANSGA mutant, and whether the effect of H171Y substitution in hO1-ANSGA channel  
271 alters these parameters. As reported earlier, we could observe rotation of the F99 residue indicative of TM1 helix  
272 rotation in hO1-H134S MD simulations (Bulla et al., 2019), which was even more evident in hO1-H134A mutant  
273 channel (**Figure 5—figure supplement 2A**). However, this effect could neither be observed in constitutively open  
274 hO1-P245L TM4 mutant nor in hO1-ANSGA mutant channel in course of 200 ns long simulations (**Figure 5—**  
275 **figure supplement 2A**). On the other hand, in comparison to hO1 WT, no considerable pore dilation was clearly  
276 evident in the MD simulations of any of the tested hO1 mutants including hO1-ANSGA (**Figure 5—figure**  
277 **supplement 2B,C**). Since neither TM1 helix rotation nor pore dilation was evident in the MD simulations of hO1-  
278 ANSGA, we did not analyze these parameters for the H171 mutants of the hO1-ANSGA channel. Overall, these  
279 results indicate that the substitution of H171 by tyrosine in human Orai1-ANSGA decreases the  $\alpha$ -helical  
280 propensity of the TM4 helix extension (residues 265-267) as well as attenuates the local coupling between TM3  
281 and TM4 (A175-Y258). Additionally, we identified Y258 as a critical residue for the constitutive activity of the hO1-  
282 ANSGA mutant channel.



283 **The H171Y substitution does not abolish the constitutive activity of human Orai1 TM1 V102C, TM2**  
 284 **H134A and TM4 P245L and F250C mutants**

285 Next, we aimed to determine if H171Y mutation also abolishes the activity of other known constitutively open Orai1  
 286 mutants, or if its effect is specific to the ANSGA-dependent constitutive activity of hO1. The hO1 TM4 mutants,  
 287 P245L or F250C as well as TM2 mutant H134A, did not show any deficit in constitutive  $\text{Ca}^{2+}$  influx when additional  
 288 H171Y mutation was introduced in these channels. Also, the TM1 pore mutant hO1-V102C upon introduction of  
 289 H171Y substitution resulted in only a minor drop of constitutive activity (**Figure 6A,B**) suggesting the inhibitory  
 290 effect of H171Y is specific to hO1-ANSGA. Further, the effect of H171Y on the constitutive activity of the hO1-  
 291 ANSGA mutant channel was independent of the TM4 cytosolic extension beyond the ANSGA region, as H171Y  
 292 mutation still abrogated the constitutive  $\text{Ca}^{2+}$  influx through hO1-ANSGA channel lacking the residues 266-301  
 293 (hO1-ANSGA- $\Delta$ CT) (**Figure 6—figure supplement 1**).

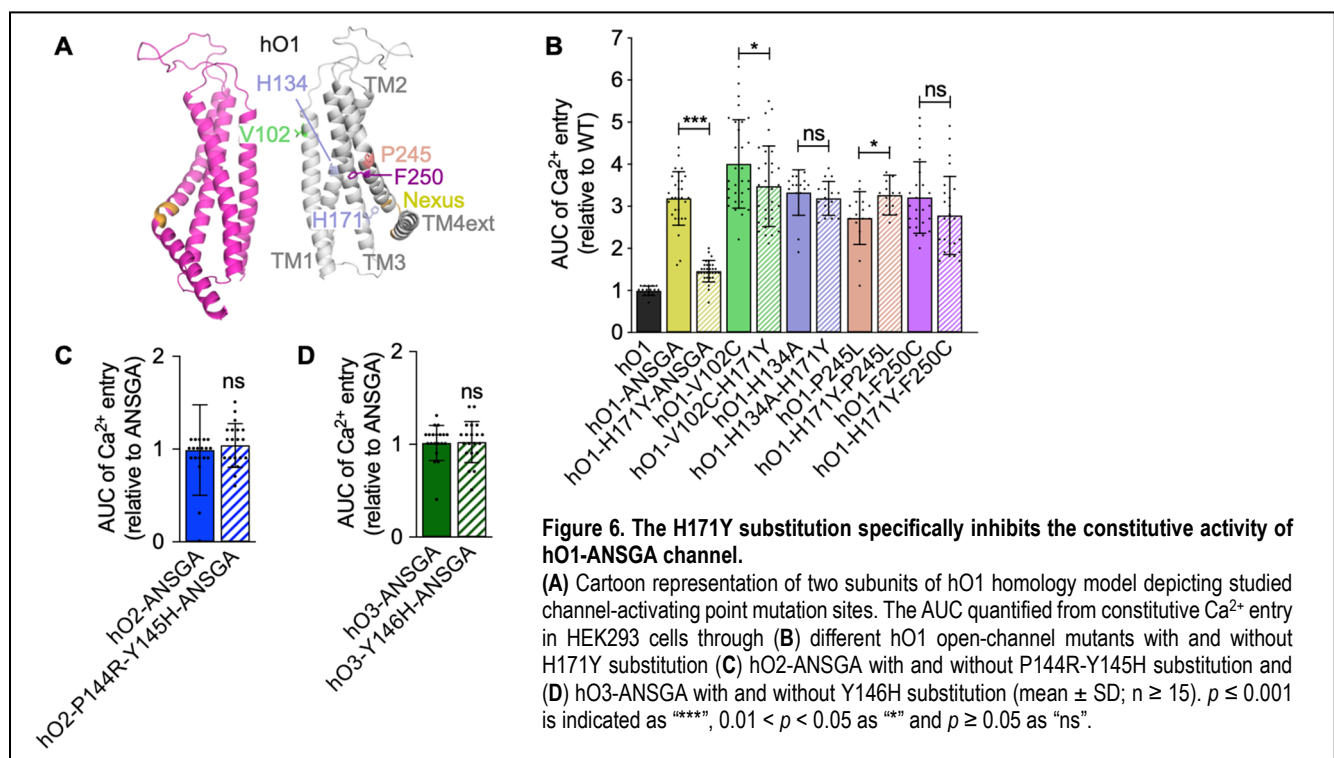

294 Finally, we addressed whether reverting the native tyrosine in hO2- and hO3-ANSGA channels, corresponding to  
 295 residue position 171 of hO1, to histidine would render these mutant channels constitutively active. We incorporated  
 296 the P144R-Y145H and Y146H substitutions in the hO2- and hO3-ANSGA channels, respectively, to mimic the  
 297 residues present in hO1. Interestingly, it did not restore their ability to constitutively permeate  $\text{Ca}^{2+}$  ions (**Figure**  
 298 **4B, Figure 6C,D**). These findings indicated, that although the identified His/Tyr substitution may contribute to the



299 inactivity of the hO2- and hO3-ANSGA nexus mutants, there may be additional substitutions in these Orai paralogs  
300 that do not allow their nexus mutants to be constitutively active.

301 **Substituting TM4 residue(s) of human Orai1 by human Orai2 or Orai3 or mouse Orai1 residue(s) abolishes**  
302 **the constitutive activity of human Orai1-ANSGA**

303 Unlike in case of ANSGA, the hO2 P206L and hO3 P254L mutants corresponding to hO1 P245L showed  
304 constitutive Ca<sup>2+</sup> entry (**Figure 7—figure supplement 1A,B,C**). Unexpectedly, however, the hO1 F250C-  
305 analogous hO2-F211C and hO3-F259C mutants did not show constitutive activity (**Figure 7—figure supplement**  
306 **1A,B,C**), leading us to believe that differences in the TM4 segment between P245 and the nexus residues may  
307 contribute to the different outcomes of the ANSGA mutants of human Orai paralogs (**Figure 7A**). To address this,  
308 we first replaced several non-conserved residues spanning 246-255 positions within hO1-ANSGA by the residues  
309 present in either hO2 or hO3. The resulting hO1-F246V-I251V-A254T-V255I-ANSGA (mimicking hO2-ANSGA)  
310 and hO1-F246V-I249V-I251V-V252A-V255L-ANSGA (mimicking hO3-ANSGA) showed drastically lower or no  
311 constitutive Ca<sup>2+</sup> influx in comparison to the hO1-ANSGA channel (**Figure 7B,C**). In the following experiments, we  
312 started systematically re-introducing these substitutions into a hO1-ANSGA background to pinpoint the role of  
313 individual amino acids in preventing the ANSGA-mediated conformational transition leading to hO1 channel  
314 opening. First, we limited the introduced substitutions to F246V and I251V, mimicking both hO2 and hO3, since  
315 these are the only two common residues in hO2 and hO3 within the TM4 segment corresponding to residues 246-  
316 255 of hO1 (**Figure 7A**). The I251V substitution alone did not affect the constitutive activity of the hO1-ANSGA  
317 channel (**Figure 7D**), whereas the F246V substitution completely prevented its constitutive activation (**Figure**  
318 **7E,F**). Consistently, the hO1-F246V-ANSGA mutant showed a major drop in percentage of cells showing nuclear  
319 NFAT1 translocation compared to the hO1-ANSGA channel (**Figure 7G, Figure 7—figure supplement 1D**).  
320 Importantly, the F246V mutation did not affect the surface expression of the hO1-ANSGA protein (**Figure 7—**  
321 **figure supplement 1G**). Interestingly, mO1 contained a cysteine at the residue position 249 corresponding to  
322 F246 in hO1 (**Figure 7A**), and F246C substitution in hO1-ANSGA also abolished its constitutive activity but not  
323 the surface expression (**Figure 7H, Figure 7—figure supplement 1G**). On the other hand, the constitutive activity  
324 of the more conservative variant hO1-F246Y-ANSGA was preserved (**Figure 7H**). Also, a consistent effect of  
325 F246C and F246Y substitutions in hO1-ANSGA was observed in the NFAT1 nuclear translocation experiments  
326 (**Figure 7I, Figure 7—figure supplement 1D**). Based on these findings we hypothesized that the substitution of

327

**Figure 7. Identification of F246 residue as a gating checkpoint controlling the constitutive activity of the hO1-ANSGA channel.**

(A) Cartoon representation of a single subunit of hO1 model depicting TM4 residues P245-K265 along with the multiple sequence alignment of mentioned residues of hO1, hO2, hO3, mO1, xO1 and dOrai is shown. The highlighted residues in boxes are numbered on top according to corresponding hO1 positions. (B) The quantified AUC of constitutive Ca<sup>2+</sup> entry recorded in HEK293 S1/S2 DKO cells expressing WT hO1, hO1-ANSGA and indicated hO2-mimicking and hO3-mimicking TM4 segment hO1-ANSGA mutants (mean ± SD; n=20).  $p \leq 0.001$  is indicated as “\*\*\*\*”.

(C) Current densities (CD) of the constitutive Ca<sup>2+</sup> currents recorded from HEK293 S1/S2 DKO cells transiently overexpressing: WT hO1 (n=6), hO1-ANSGA (n=23), hO1-F246V-I251V-A254T-V255I-ANSGA (n=8) and hO1-F246V-I249V-I251V-V252A-V255L-ANSGA (n=8), presented as average values, -SEM, with corresponding average current-voltage (I/V) relations extracted at t= 59s. (D) The quantified AUC of constitutive Ca<sup>2+</sup> entry recorded in HEK293 S1/S2 DKO cells expressing WT hO1, hO1-ANSGA and hO1-I251V-ANSGA mutants (mean ± SD; n ≥ 20).  $p \geq 0.05$  indicated as “ns”.

(E) The AUC quantified from constitutive Ca<sup>2+</sup> entry in HEK293 S1/S2 DKO cells through hO1-ANSGA and hO1-F246V-ANSGA channel (mean ± SD; n ≥ 20).  $p \leq 0.001$  is indicated as “\*\*\*\*”.

(F) Current densities (CD) of the constitutive Ca<sup>2+</sup> currents recorded from HEK293 S1/S2 DKO cells transiently overexpressing: WT hO1 (n=6), hO1-ANSGA (n=23) and hO1-F246V-ANSGA (n=6), presented as average values, -SEM, with corresponding average current-voltage relations extracted at t= 59s.

(G) HEK293 cells expressing WT hO1, hO1-ANSGA and hO1-F246V-ANSGA constructs having NFAT1-CFP localized to the nucleus shown as percentage (mean ± SD; n ≥ 3).  $p \leq 0.001$  is indicated as “\*\*\*\*”.

(H) The quantified AUC of constitutive Ca<sup>2+</sup> entry recordings from HEK293 S1/S2 DKO cells expressing hO1-ANSGA, hO1-F246C-ANSGA and hO1-F246Y-ANSGA mutants relative to WT hO1 (mean ± SD; n=20).  $p \leq 0.001$  is indicated as “\*\*\*\*”.

(I) HEK293 cells expressing WT hO1, hO1-ANSGA, hO1-F246C-ANSGA and hO1-F246Y-ANSGA with nuclear localization of NFAT1-CFP are shown as percentage (mean ± SD; n ≥ 3).  $p \leq 0.001$  is indicated as “\*\*\*\*” and  $p \geq 0.05$  as “ns”. (J) The AUC of constitutive Ca<sup>2+</sup> influx recorded in HEK293 S1/S2 DKO cells expressing WT mO1, mO1-ANSGA, mO1-C249F-ANSGA and mO1-C249F mutants (mean ± SD; n = 10).  $p \leq 0.001$  is indicated as “\*\*\*\*” and  $p \geq 0.05$  as “ns”.

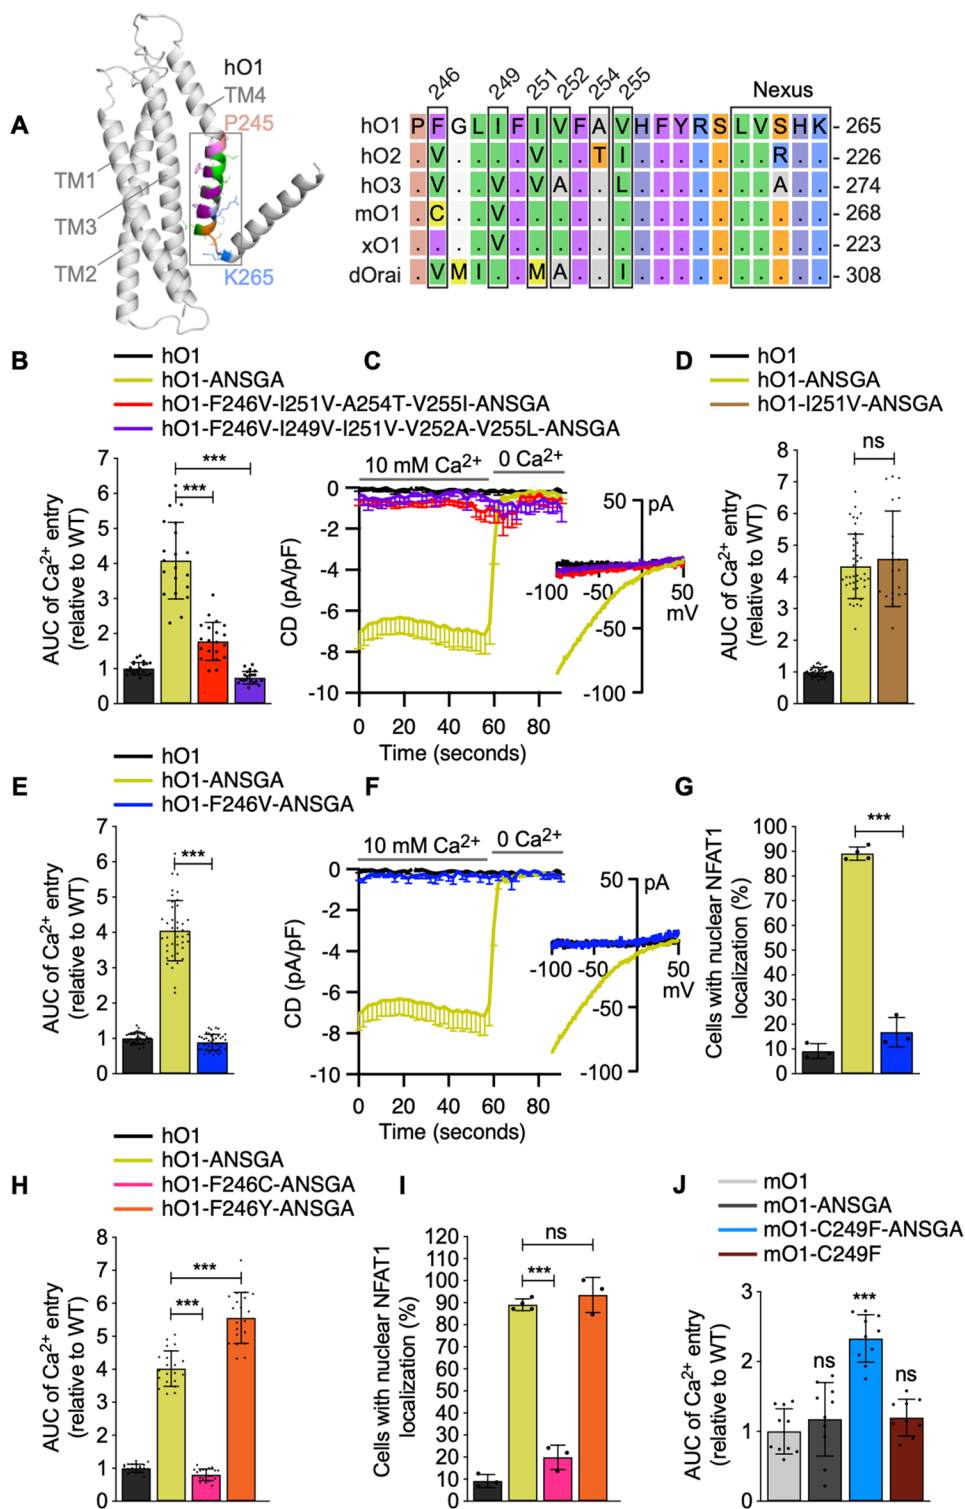

328 C249 residue at the position of hO1 F246 (**Figure 7A**). Indeed, mO1-ANSGA was not constitutively active (**Figure**  
329 **7J**). However, additional C249F substitution resulted in the activation of the mO1-C249F-ANSGA but not the mO1-  
330 C249F channel, consistent with our hypothesis (**Figure 7J**).

331 We next systematically evaluated the impact of other hO2- or hO3-like substitutions within the hO1 249-255  
332 residues segment on the constitutive activity of hO1-ANSGA nexus mutant. The combined A254T and V255I  
333 mutagenesis to mimic hO2-like residues in hO1-ANSGA did not abolish the constitutive Ca<sup>2+</sup> influx through the  
334 resulting hO1-A254T-V255I-ANSGA mutant channel (**Figure 7—figure supplement 1E,F**). On the contrary, the  
335 combination of I249V, V252A and V255L mutations to mimic hO3-like residues in hO1-ANSGA abolished the  
336 constitutive activity of hO1-I249V-V252A-V255L-ANSGA mutant channel but not its cell surface expression  
337 (**Figure 7—figure supplement 1E,F,G**). Individual I249V, V252A, V255L or combined I249V-V255L substitutions  
338 caused only minor decrease in the constitutive Ca<sup>2+</sup> influx through the hO1-ANSGA channel indicating an additive  
339 effect of these mutations in abolishment of the constitutive activity of hO1-ANSGA (**Figure 7—figure supplement**  
340 **2A**). Consistently, the hO1-ANSGA mutants with individual I249V, V252A, V255L or combined I249V-V255L  
341 substitutions showed a smaller drop in percentage of cells with nuclear translocation of NFAT1 compared to the  
342 hO1-I249V-V252A-V255L-ANSGA mutant channel (**Figure 7—figure supplement 2B,C**). Altogether, these  
343 findings highlight the relevance of TM4 residues in the constitutive activation of the hO1-ANSGA channel.

#### 344 **The F246V/C substitution in human Orai1-ANSGA affects the coupling between TM4 and TM3 as well as** 345 **$\alpha$ -helical propensity of the TM4 helix extension**

346 Next, to understand the mechanism of F246V-mediated inhibition of the hO1-ANSGA channel, we carried out a  
347 set of MD simulations to determine whether the F246 substitutions affect the helicity of the TM4 helix extension  
348 spanning residues 259-269. The F246V mutation in hO1-ANSGA caused a reduction in the  $\alpha$ -helical propensity  
349 of the residues 260-264 which is also evident for the F246C mutation except for residue 262 (**Figure 8B**).  
350 Contrarily, the  $\alpha$ -helicity of hO1-F246Y-ANSGA showed a similar trend as hO1-ANSGA. Continuing the MD  
351 analysis further, we investigated whether the F246 substitutions affect the TM4-TM3 coupling within the hO1-  
352 ANSGA nexus mutant channel (**Figure 8A**). While the mutation F246V in the hO1-ANSGA channel decreased the  
353 contact frequency between A175 and Y258 only slightly, F246C showed considerably lower A175-Y258 contacts.  
354 On the other hand, the F246Y substitution in hO1-ANSGA did not affect the contacts between A175 and Y258  
355 (**Figure 8C**). The L174-L/A261 or F178-F257 contacts remained unchanged upon any of the F246V/C/Y mutations

356 in hO1-ANSGA (**Figure 8—figure supplement 1**). In summary, our simulations suggest that substitution of F246  
 357 in TM4 of the hO1-ANSGA channel to valine or cysteine, but not tyrosine, affects the  $\alpha$ -helicity of the TM4 helix  
 358 extension spanning residues 259-269 as well as disrupts the local TM3-TM4 coupling.

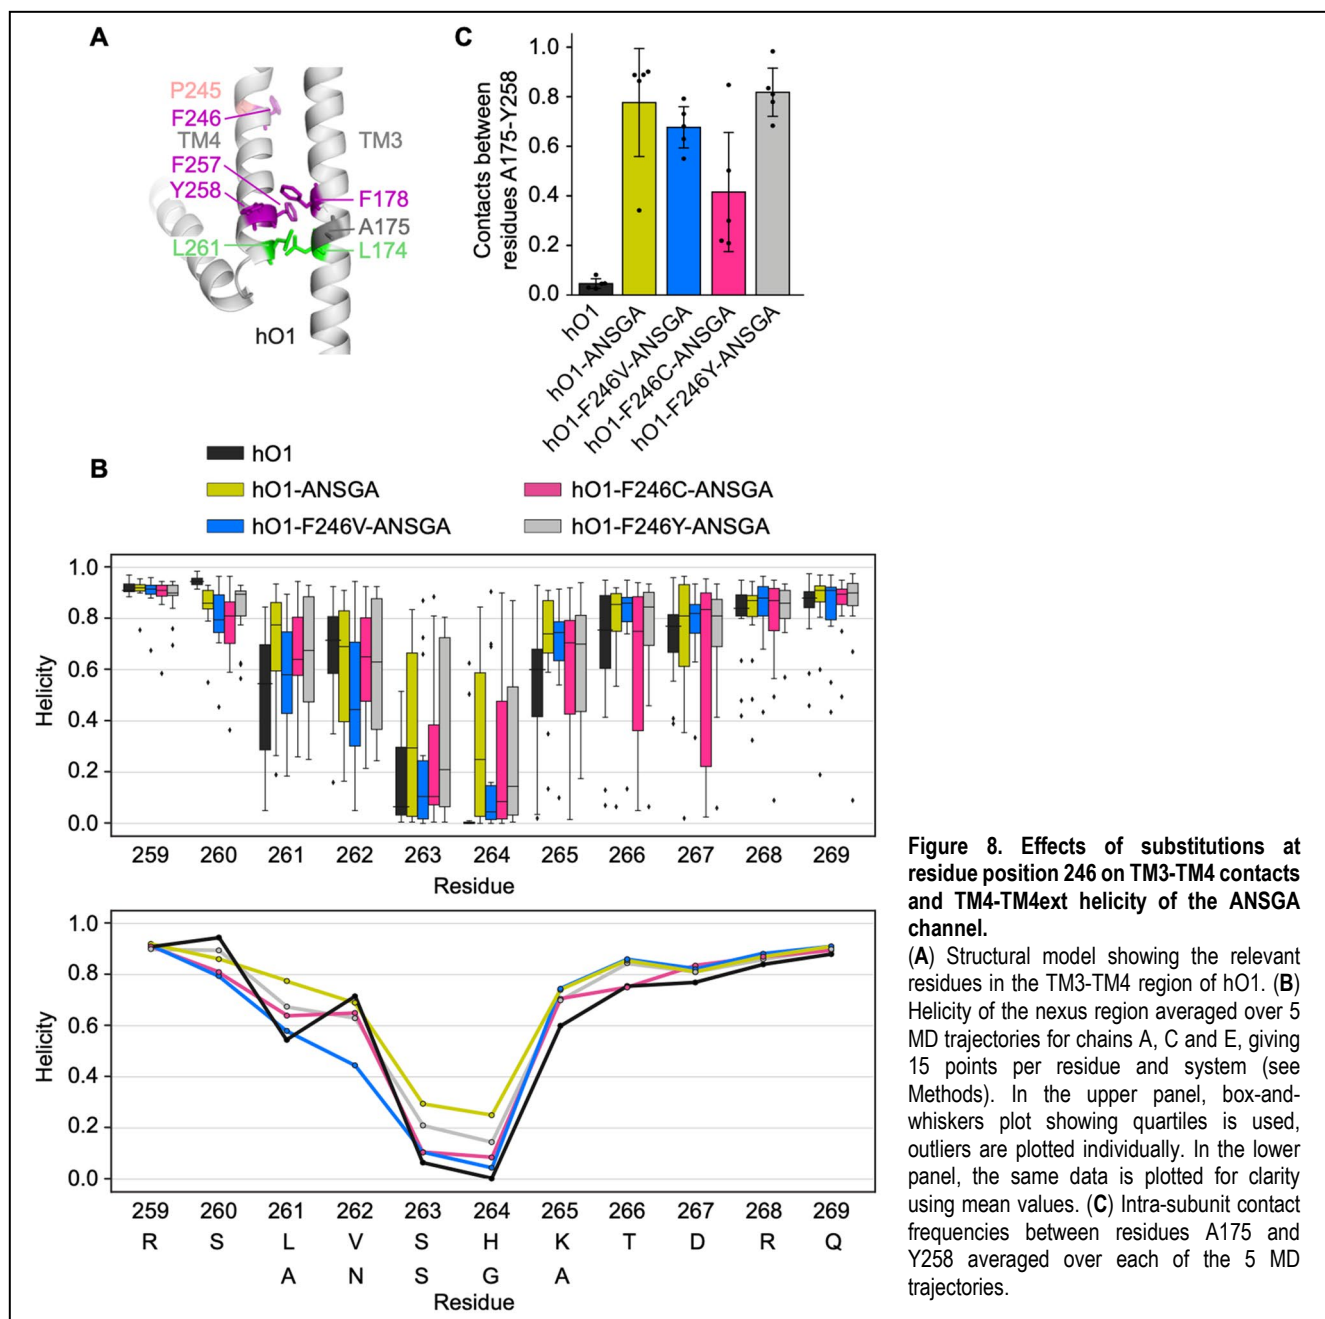

359 **The F246V substitution does not abolish the constitutive activity of human Orai1 V102C, H134A and P245L**  
 360 **mutants, but abolishes the constitutive activity of human Orai1-F250C mutant**

361 In order to investigate whether the abrogating effect of the F246V substitution is specific to the ANSGA-dependent  
 362 constitutive activity of the hO1, we introduced the F246V mutation into other constitutively active variants of hO1,

Augustynek et al.

Gating mechanisms of Orai calcium channels

363 namely the V102C, H134A, P245L and F250C mutants, as we have done earlier for H171Y (**Figure 9A**). Unlike  
 364 H171Y, the F246V substitution significantly diminished the constitutive  $\text{Ca}^{2+}$  influx through the above-mentioned  
 365 mutants with hO1-F246V-F250C showing no constitutive activity (**Figure 9B**). Similar to H171Y, the F246V  
 366 mutation completely blocked the constitutive activity of the hO1-ANSGA- $\Delta$ CT mutant (**Figure 9—figure**  
 367 **supplement 1**) indicating the dispensability of residues 266-301 of hO1-ANSGA in the F246V-mediated block of

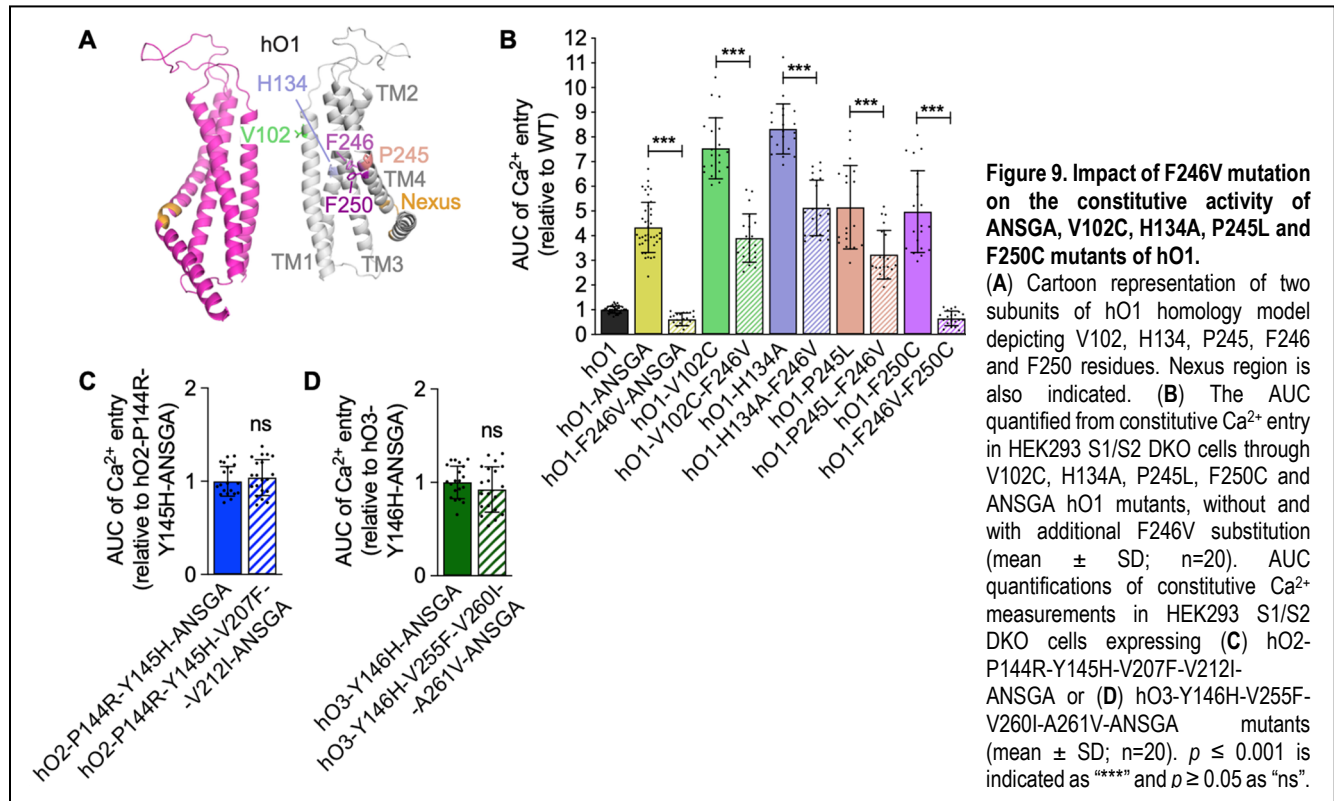

368 constitutive activity.

369 As we have identified the F246V (hO2- and hO3-mimicking) and the I249V-V252A-V255L (hO3-mimicking)  
 370 substitutions in hO1 paralogs to abrogate constitutive activity of their ANSGA variants, we were interested whether  
 371 the reverse, hO1-mimicking mutations in a hO2-ANSGA and hO3-ANSGA background would enable constitutive  
 372 activity of these channels. To this end, we used our hO2-P144R-Y145H-ANSGA and hO3-Y146H-ANSGA mutants  
 373 as background, which already contained hO1-mimicking substitutions at positions corresponding to H171 and  
 374 R170 in hO1 (**Figure 4B**). In these hO2 and hO3 constructs, we introduced further substitutions mimicking the  
 375 hO1 F246 (V207F in hO2 and V255F in hO3), I251 (V212I in hO2 and V260I in hO3) and V252 (A261V in hO3)  
 376 residues (**Figure 7A**). However, both of these hO1-like hO2-ANSGA and hO3-ANSGA channels remained closed  
 377 (**Figure 9C,D**). In addition to the above-mentioned reversal mutations, the hO3-ANSGA mutant further containing  
 378 the V258I-A261V-L264V substitutions, corresponding to the reversal of hO1 I249V-V252A-V255L mutations



379 (Figure 7A) that inhibited hO1-ANSGA activity, also remained constitutively inactive (data not shown). Clearly,  
380 there are further differences among the human Orai paralogs which render hO2 and hO3 incapable of being  
381 activated by the ANSGA nexus mutation.

### 382 Human Orai1 H171Y as well as F246V mutants can be gated by STIM1

383 Finally, we aimed to determine whether the H171Y and F246V mutations also interfere with the canonical STIM1-  
384 dependent activation of hO1. To this end, we generated relevant hO1 mutants without any mutations in the nexus  
385 residues, expressed them in the S1/S2 DKO HEK293 cells along with the STIM1 protein, and measured  $I_{CRAC}$   
386 upon stimulation with inositol triphosphate ( $IP_3$ ). Similarly, we tested the hO1-H171Y-ANSGA and hO1-F246V-  
387 ANSGA mutants. The obtained results showed that both hO1-H171Y and hO1-F246V mutants could be activated  
388 by STIM1, while the corresponding ANSGA nexus mutants remained inactive (Figure 10). Notably, the hO1-  
389 H171Y mutant, gated by STIM1, displayed  $I_{CRAC}$  characteristics typical for the WT channel (Figure 10A). The hO1-  
390 F246V mutant gated by STIM1, however, evoked  $I_{CRAC}$  characterized by different kinetics and current size.  
391 Moreover, it exhibited a clear inactivation component, which was not present in the WT hO1- or hO1-H171Y-  
392 mediated currents (Figure 10B). These findings, however, require further elucidation beyond the scope of the  
393 current work.

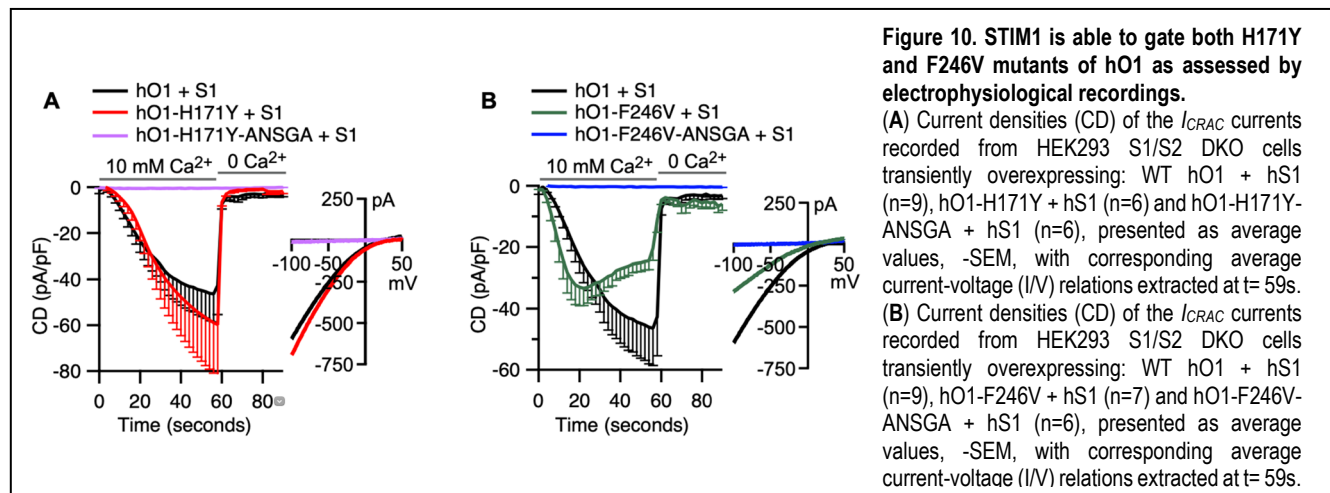



394 **Discussion**

395 In recent years, several studies have put forward different models for hO1 channel activation, which include the  
396 rotation of the TM1 helix (Yamashita et al., 2017), twist-to-open (Dong et al., 2019), counter-ion assisted  
397 permeation (Liu et al., 2019) and a pore dilation model (Frischauf et al., 2017; Hou et al., 2018; Hou et al., 2020).  
398 However, the exact gating mechanism of the hO1 channel by STIM1 is far from being fully understood and is  
399 awaiting structural studies of the STIM1-Orai1 complex. Nevertheless, numerous studies have led to the current  
400 understanding that the binding of STIM1 at the C-terminus of Orai1 initiates a series of conformational changes  
401 that propagate through numerous gating checkpoints within Orai1 subunits and thereby culminate in CRAC  
402 channel activation (Fahrner et al., 2018; Frischauf et al., 2017; Palty et al., 2015; Tiffner et al., 2020; Yeung et al.,  
403 2018; Y. Zhou et al., 2016). A major goal of our study was to investigate whether these checkpoints and gating  
404 elements are conserved among the three human Orai paralogs.

405 We first investigated whether the TM1-TM2 conformational coupling was also conserved in hO2 and hO3 by  
406 mutagenesis of the residues corresponding to H134, a “checkpoint” residue of this coupling in hO1 (Frischauf et  
407 al., 2017; Yeung et al., 2018). The constitutive Ca<sup>2+</sup> current observed in both hO2-H108A and hO3-H109A (**Figure**  
408 **2C**) suggests a conserved TM1-TM2 interplay in the gating of human Orai channels. Further, constitutive Ca<sup>2+</sup>  
409 influx through dOrai-H206A was reported recently (Hou et al., 2020). Moreover, in line with our data, a recent  
410 report published during the preparation of our manuscript demonstrated constitutive current through the H109A  
411 mutant of hO3 but did not test the same for hO2 (Tiffner et al., 2021). Also, the study of Tiffner *et al.* did not  
412 investigate if hO3-H109A or hO2-H108A would lead to nuclear translocation of NFAT1 (**Figure 2D,E**). On the other  
413 hand, the H134A mutant of hO1 has been shown to effectively cause the translocation of NFAT1 to the nucleus  
414 (Frischauf et al., 2017). In summary, our results point in the direction that the sequence of events during the gating  
415 mechanism downstream of the H134 checkpoint are conserved in a wide range of Orai proteins.

416 While both earlier studies related to the H134 checkpoint suggest a conformational coupling mechanism between  
417 TM2 and TM1 of hO1 leading to channel opening, different mechanistic explanations have been proposed.  
418 Frischauf *et al.* suggest that TM2 H134 forms a hydrogen bond with the TM1 S93 residue and this serves as a  
419 hydrogen bond-dependent trigger that gates hO1 channels (Frischauf et al., 2017). On the contrary, Yeung *et al.*  
420 argue against the formation of this hydrogen bond and rather suggest that substitution of the bulky side chain of  
421 H134 by smaller amino acids allows rotation of the TM1 F99 away from the pore axis (Yeung et al., 2018), a

422 phenomenon that was not observed by Frischauf and co-workers (Frischauf et al., 2017). Although the rotation of  
423 the TM1 helix was also not evident from the recent structure of dOrai-H206A (corresponding to hO1-H134A), the  
424 rigid-body outward movement of each dOrai-H206A subunit resulted in repositioning of F171 (corresponding to  
425 hO1 F99), which slides away from the pore, widening the hydrophobic region (Hou et al., 2020). In contrast, we  
426 could observe the TM1 (F99) rotation in hO1-H134A MD simulations as well as reproduce our earlier findings  
427 using a homology-based model of hO1 bearing the H134S substitution (Bulla et al., 2019) (**Figure 5—figure**  
428 **supplement 2A**). Overall, our MD simulations confirm that sustained Orai1 channel opening requires the  
429 displacement of F99 away from the pore.

430 Our results also indicate that the mechanistic function of the sulfur-aromatic latch is conserved in all three human  
431 Orai channels. The M101 residue in hO1 TM1 has been suggested to function as a “gate latch” by engaging the  
432 hydrophobic gate (F99) of the neighboring subunit to sustain the open conformation of the hexameric channel  
433 (Yeung, Ing, et al., 2020). Consistently, our MD simulations have confirmed a higher contact frequency between  
434 F99-M101 in hO1-H134A/S compared to the WT channel (**Figure 2—figure supplement 2C,D,E**). Our finding is  
435 in line with the report on narrowing of the distance between F171 and M173 of dOrai (corresponding to hO1 F99  
436 and M101, respectively) in the open state of the channel (dOrai H206C/Q) compared to WT (Yeung, Ing, et al.,  
437 2020). In the other, resting state of the “gate latch”, it has been suggested that M101 partners with F187 in the  
438 TM3 of the adjacent subunit, stabilizing the M101-F187 resting interaction. This, in turn, may arrest the hO1  
439 channel in a closed state, likely due to the release of F99 side chain into the pore-facing conformation (Yeung,  
440 Ing, et al., 2020). Interestingly, hO1-F187C was reported constitutively active (Yeung et al., 2018) and in light of  
441 the recent findings from Prakriya’s laboratory, it is reasonable to envision that due to the inability of C187 to engage  
442 in the M101-dependent gate latch, M101 instead permanently arrests F99 out of the pore axis, supporting the  
443 constitutively active state of the hO1-F187C channel (Yeung, Ing, et al., 2020). Our findings that the hO1-F187C  
444 and the corresponding hO2-F161C and hO3-F162C channels are constitutively active (**Figure 2—figure**  
445 **supplement 2F,G,H,I**) suggest that the recently proposed M101-F187 interactions which support hO1 channel  
446 closing (Bonhenry et al., 2021; Yeung, Ing, et al., 2020) are also conserved in hO2 and hO3. Overall, our data  
447 show that the inter-subunit conformational coupling of hO1 between TM1-TM2 (F99-H134), as well as TM1-TM3  
448 (M101-F187), are also conserved in hO2 and hO3 paralogs.

449 Moving more distal from the pore, we showed that the TM4 mutations corresponding to the position hO1 P245,  
450 namely P206C and P254C in hO2 and hO3, respectively, rendered them constitutively active (**Figure 7—figure**

451 **supplement 1A,B,C**). Consistently, constitutive current through hO3-P254L has also been recorded in a previous  
452 report (Derler et al., 2018). The structure of P288L dOrai (corresponding to P245L hO1) shows a clear  
453 straightening of the kink in TM4 at P288 (Liu et al., 2019). The conserved constitutive activation effect of P245,  
454 P206 and P254 substitutions in hO1, hO2 and hO3, respectively, suggests that these mutations may trigger similar  
455 structural rearrangements among Orai paralogs. In our MD simulations, the tubular aggregate myopathy (TAM)-  
456 associated P245L mutant showed a significantly higher  $\alpha$ -helical propensity of the TM4 fragment upstream of L245  
457 (residues 241-244) compared to WT (**Figure 5—figure supplement 1A**), indicating the unbending of the proline  
458 kink as a possible mechanism of how this mutation opens the channel.

459 In contrast to the above-mentioned gating checkpoints that we show to be conserved among human Orai channels,  
460 we also report positions that could represent steric brakes that are not conserved among the three human Orai  
461 channels. Interestingly, these positions lie further away from the pore, in the TM4 and TM4ext regions.

462 One of these positions is residue F250 within TM4 of hO1, the mutation of which (F250C) was identified in a  
463 cysteine screen of hO1 TMs (Yeung et al., 2018) to lead to the constitutive activation of hO1 (Tiffner et al., 2020;  
464 Yeung et al., 2018). Our data shows that unlike the mutants of hO2 and hO3 corresponding to hO1 P245L, the  
465 hO2-F211C and hO3-F259C mutants, corresponding to hO1-F250C, do not exhibit any constitutive activity (**Figure**  
466 **7—figure supplement 1A,B,C**).

467 Importantly and central to our work, we also show that the ANSGA “nexus” mutations, further along the protein  
468 chain in the hinge region between TM4 and TM4ext, likely also exert their activating effect through a non-conserved  
469 mechanism. Based on hO1-ANSGA, we expected the ANSGA mutants of hO2 and hO3 to also display constitutive  
470 activity and NFAT1 activation. However, this was not the case (**Figure 3C,D,E,F,G,J,K**). Also, despite dOrai, xO1  
471 and mO1 all having the LVSHK nexus residues conserved, only the ANSGA mutant of xO1 exhibited the  
472 constitutive activity (**Figure 3H,I and Figure 7J**).

473 Although all of the P245, F250 and the LVXHK nexus residues of hO1 are conserved among different human Orai  
474 paralogs as well as in Orai channels of lower organisms, the neighboring residues within TM4 are not very well  
475 conserved, e.g. *Drosophila* Orai1 protein, which shares only 47% overall identity with hO1, has several additional  
476 non-conserved residues downstream from P288 corresponding to P245 of hO1 (**Figure 7A**). Thus, the differences  
477 in sequence in this region might interfere with constitutive activation by ANSGA in certain Orai channels and may  
478 also explain differences in gating mechanism in various Orai paralogs and orthologs.

479 Current knowledge on the mechanism by which STIM1 or ANSGA nexus mutations activate Orai1 is incomplete  
480 and does not explain our observed lack of activation by the ANSGA mutation in hO2, hO3 and certain Orai  
481 orthologs. The gating-related conformational changes that initiate within the TM4 helix of hO1 upon binding of  
482 STIM1 to its C-terminus and propagate to the channel's pore-forming TM1 presumably rely on flexion of the hO1  
483 C-terminal nexus hinge residues (Y. Zhou et al., 2016). In support of this mechanism, we observed a notable  
484 increase in the calculated helicity of the LVSHK region when substituted with ANSGA residues, which may be  
485 indicative of the flexion of TM4ext (**Figure 5B**). Disrupting the flexibility of the LVSHK hinge, for example by the  
486 S263P mutation, abolished  $I_{CRAC}$  (Tirado-Lee et al., 2015) even when hO1 was covalently linked with two active  
487 fragments of STIM1, suggesting a critical role of hinge flexibility in gating of hO1 by STIM1 (Palty et al., 2015). The  
488 motifs corresponding to LVSHK in hO2 and hO3 contain either an arginine or an alanine residue, respectively, in  
489 the place of serine (**Figure 3B**). These substitutions, however, are not expected to change the overall structure or  
490 flexibility of the LVSHK hinge, as the mutation of S263 to either arginine or alanine did not affect the interaction  
491 between hO1 and channel activation domain of STIM1 (Tirado-Lee et al., 2015). Therefore, hO2 and hO3 are  
492 envisioned to have an overall similar structural architecture of the nexus hinge as hO1. Furthermore, mutations of  
493 hO2 and hO3 residues corresponding to the earlier mentioned L273 and L276 residues of hO1 also affected the  
494 interaction of hO2 and hO3 with STIM1, as well as diminished the  $I_{CRAC}$  (Baraniak et al., 2021; Frischauf et al.,  
495 2009; Frischauf et al., 2011; Niu et al., 2020). The mechanism how ANSGA causes the constitutive activity of the  
496 hO1 channel is also likely different from that of the P245L mutation, since the helicity changes observed in our MD  
497 simulations upon ANSGA substitution of LVSHK residues in hO1 remained restricted around the nexus region  
498 without affecting the helicity of the TM4 helix region (residues 240-250) encompassing the proline bend caused  
499 by P245 (**Figure 5A, Figure 5—figure supplement 1A**).

500 Interestingly, we were able to uncover three positions that seem to interfere with ANSGA-induced activation of  
501 hO1, all of which point at the importance of TM4-TM3 contacts in transducing gating-relevant conformational  
502 changes from the distal TM rings towards the central pore. The first of these positions, which we have identified  
503 through multiple sequence alignments and homology-based modeling, is H171, located in the cytosolic extension  
504 of TM3 helix (TM3ext), proximal to the LVSHK motif, and not conserved in hO2, hO3 and dOrai (**Figure 4A,B**).  
505 When H171 was substituted by tyrosine, which is the native residue at the corresponding position in hO2, hO3  
506 and dOrai, both the constitutive activation of hO1-ANSGA and NFAT1 activation were lost (**Figure 4C,D,G**).  
507 Surprisingly, however, the H171Y substitution did not eliminate the constitutive activity of other known hO1 open

508 channel mutants such as TM1 V102C (McNally et al., 2012; Yamashita et al., 2017), TM2 H134A (Frischauf et al.,  
509 2017; Yeung et al., 2018), TM4 P245L (Nesin et al., 2014; Palty et al., 2015) and TM4 F250C (Yeung et al., 2018)  
510 (**Figure 6A,B**). Similarly, the H171Y substitution in hO1 with native nexus “LVSHK” residues did not affect STIM1-  
511 mediated gating of the channel (**Figure 10A**). Nevertheless, the importance of the H171 residue in gating is also  
512 corroborated by a recent report showing that the H171D substitution, identified through randomized mutations,  
513 minimized the activity of the engineered light-operated hO1-P245T channel in dark, while retaining its activity  
514 under blue light illumination (He et al., 2021). Residue H171 of hO1 appears to be a feature in the Orai1 proteins  
515 of vertebrates, whereas a conserved tyrosine residue takes the corresponding position in invertebrates. A study  
516 suggesting diversification of Orai gating mechanisms between invertebrates and mammals showed that the  
517 F192R-Y193H substitution in the Orai channel of *C. elegans* to mimic hO1 residues R170-H171 led to STIM1-  
518 independent constitutive activation of *C. elegans* Orai channel, as well as nuclear translocation of NFAT1 (Kim et  
519 al., 2018). Thus, we propose that the H171 position is essential to Orai channel gating, nevertheless its role in  
520 hO1 might be limited to local, “weak” stabilization of TM3-TM4 contacts. Thus, a H171Y substitution, native to hO2  
521 and hO3 at this position, abrogates the effect of the ANSGA mutation in hO1, but not that of other activating  
522 mutations, and it also does not affect normal STIM-mediated gating.

523 In pursuit of understanding the mechanism of action of the H171Y-mediated selective inhibition of hO1-ANSGA  
524 constitutive activity, we show that TM3-TM4 contacts are essential for ANSGA-induced activation. In particular,  
525 TM3-TM4 interaction pairs F178-F257 (Liu et al., 2019) and L174-L/A261 (Y. Zhou et al., 2016) have been  
526 previously shown to be important for hO1 channel activation, and we found that these residues, as well as Y258  
527 (TM4) are indispensable for the activity of the hO1-ANSGA channel as well (**Figure 5D,E and Figure 5—figure**  
528 **supplement 1C**). While the ANSGA substitution did not affect the contact frequencies of these TM3-TM4 residue  
529 pairs in our MD simulations, it did result in significantly enhanced contact frequencies of another TM3-TM4 residue  
530 pair, A175 and Y258, which were in turn impaired by a further H171Y substitution (**Figure 5A,C**). Furthermore, we  
531 found that all the residues past the ANSGA sequence do not take part in shaping the constitutive activity of the  
532 channel, since the constitutive activity of hO1-ANSGA- $\Delta$ CT channel was not compromised (**Figure 6—figure**  
533 **supplement 1 and Figure 9—figure supplement 1**), which is consistent with earlier reports (L. Zhou et al., 2018;  
534 Y. Zhou et al., 2016). In addition, the H171Y mutation still inhibited the constitutive activity of the hO1-ANSGA  
535 channel even after the removal of residues 266-301 (**Figure 6—figure supplement 1**). Therefore, even though  
536 the H171Y substitution reduced the  $\alpha$ -helical propensity of hO1-ANSGA residues 265-267 C-terminal to the

537 ANSGA motif (**Figure 5B**) in our MD simulations, the last 36 residues beyond residue 265 are dispensable for  
538 ANSGA-induced gating. Based on these results, we believe that the impairment in the local coupling between  
539 TM3-TM4 (A175-Y258) may be the relevant reason for the disruption of hO1-ANSGA channel activity by the H171Y  
540 substitution.

541 The second position that we found critical in controlling the constitutive activity of hO1-ANSGA to allow influx of  
542  $\text{Ca}^{2+}$  in a constitutive manner with subsequent nuclear translocation of NFAT1 was residue F246. F246 in hO1 is  
543 conserved in xO1 but neither in hO2, hO3 and dOrai, where it is replaced by a valine residue, nor in mouse Orai1,  
544 where it is replaced by cysteine. Herein, both F246V and F246C substitutions in hO1-ANSGA prevented the  
545 constitutive  $\text{Ca}^{2+}$  influx and subsequent nuclear translocation of NFAT1 (**Figure 7E,F,G,H,I and Figure 7—figure**  
546 **supplement 1D**). Thus, we can speculate that the valine residue in hO2 and hO3 at the positions corresponding  
547 to F246 of hO1 participates in exerting a brake on the putative constitutive activity of the hO2- and hO3-ANSGA  
548 channels.

549 Although the F246V mutation did not abolish the activity of other constitutively active hO1 mutants such as V102C,  
550 H134A and P245L, it significantly decreased the measured influx of  $\text{Ca}^{2+}$ . However, unexpectedly, substitution of  
551 F246 to valine completely abolished the constitutive influx of  $\text{Ca}^{2+}$  through the hO1-F250C and hO1-ANSGA  
552 mutants (**Figure 9A,B, Figure 7E**). Since F246V did not alter the surface trafficking of hO1-ANSGA (**Figure 7—**  
553 **figure supplement 1G**), it is likely that this mutation does not alter the trafficking of V102C, H134A, P245L or  
554 F250C mutants either. Similarly to H171Y, our MD simulations suggest that TM4 mutations (F246V/C) that  
555 interfere with the constitutive activation of hO1-ANSGA also impair local coupling between TM3-TM4 (A175-Y258)  
556 and  $\alpha$ -helicity of the nexus segment (**Figure 8**). Since we also observed a significant decrease in the amplitude of  
557 STIM1-activated  $I_{\text{CRAC}}$  mediated by hO1-F246V in comparison to the WT hO1 (**Figure 10B**), it is likely that this  
558 TM4 residue is important in regulating the channel activity. In comparison to the H171 position, F246 seems to be  
559 a “strong” effector of gating in hO1, since it is able to abolish the effects of the activating mutations ANSGA and  
560 F250C, while at the same time to significantly attenuate  $\text{Ca}^{2+}$  influx mediated either by the other tested  
561 constitutively active mutant variants of hO1, or by STIM1-mediated gating.

562 In addition, as a third position affecting the gating of hO1-ANSGA, we found that a combination of other residue  
563 substitutions mimicking the residues of hO3 TM4 on hO1 (I249V-V252A-V255L) leads to abrogation of the  
564 constitutive activity of hO1-ANSGA (**Figure 7—figure supplement 1E,F and Figure 7—figure supplement 2**).



565 These positions seem to have an additive effect, which implies that there could be several other positions making  
566 contributions to shape the energetic barrier of constitutive activity.

567 Interestingly, while the substitution of H171 by tyrosine abrogated the constitutive activity of hO1-ANSGA, the  
568 reverse substitution of the corresponding hO2 Y145 and hO3 Y146 residues by histidine was not sufficient, either  
569 alone or in combination with TM4 mutations, to evoke a constitutive  $\text{Ca}^{2+}$  influx through hO2- or hO3-ANSGA  
570 mutant channels (**Figure 6C,D, Figure 9C,D**). These data provide further evidence that other residue differences  
571 in hO1 and hO2/hO3 can shape the overall energetics of channel gating. Mouse Orai1 protein, which shares 90%  
572 sequence identity with hO1, has a cysteine at the residue position corresponding to F246 of hO1 with most of the  
573 downstream residues conserved compared to hO1 (**Figure 7A**). Strikingly, the ANSGA mutant of mO1, which was  
574 otherwise constitutively inactive, resulted in a modest constitutive activation when C249 was substituted with a  
575 phenylalanine residue to mimic the native residue (F246) of hO1 (**Figure 7J**). This interesting result suggests that  
576 at least in certain Orai channels, the energetic barrier of activation can be lowered enough by a single point  
577 mutation so that activating mutations such as ANSGA can induce constitutive activity in the channel.

578 Earlier, it was shown that the addition of the ANSGA substitution in the otherwise non-selective hO1-V102C pore  
579 mutant channel renders selectivity towards  $\text{Ca}^{2+}$  and that the mutations that abrogate STIM1-mediated activation  
580 of hO1, such as the L174D mutation, also eliminate the constitutive activity of hO1-ANSGA channel (Y. Zhou et  
581 al., 2016). Based on these findings it was suggested that the ANSGA substitution of the “LVSHK” nexus residues  
582 of hO1 mimics the STIM1 gating trigger and causes a conformational change in the hO1 TM4ext leading to the  
583 opening of the channel pore formed by TM1. However, we show here that two different hO1 single point mutations,  
584 one in TM3ext (H171Y) and another in TM4 (F246V), adopted from other Orai homologs, completely abolish the  
585 constitutive activity of the O1-ANSGA channel but do not shut down the permeation of  $\text{Ca}^{2+}$  through STIM1-gated  
586 hO1 channels. This provokes us to reconsider how well the ANSGA mutant resembles the actual STIM1-gated  
587 open state of hO1. As the conformational trigger by the ANSGA substitution leading to the opening of hO1 channel  
588 is obstructed by changes that still allow gating by STIM1, it is likely that either the ANSGA channel does not follow  
589 the same order of conformational rearrangements that lead to the channel opening, or that the gating stimulus  
590 provided by STIM1 supersedes the stimulus provided by ANSGA (**Figure 11**). In other words, we could expect the  
591 ANSGA nexus mutations to be “weak” activators, while STIM1 binding provides a “strong” stimulus that is able to  
592 overcome higher energetic barriers to gate the channel as depicted in our hypothetical model (**Figure 11B,C**). We  
593 propose that mutations of TM3ext H171 and TM4 F246 in hO1 interfere with the ANSGA-mediated gating signal

594 by weakening the local coupling between TM3 and TM4 (**Figure 11E**). Nevertheless, the stimulus exerted by  
595 STIM1 binding is strong enough to open the H171Y and F246V mutant hO1 channels with intact nexus residues,  
596 regardless of the weakened TM3/TM4 coupling (**Figure 11D**). While our computational efforts also provide  
597 mechanistic insights into how the relevant H171 and F246 substitutions exert a “brake” on the relay of  
598 conformational changes along the gating pathway, future experimental studies are needed to further elucidate  
599 their exact mechanism of action.

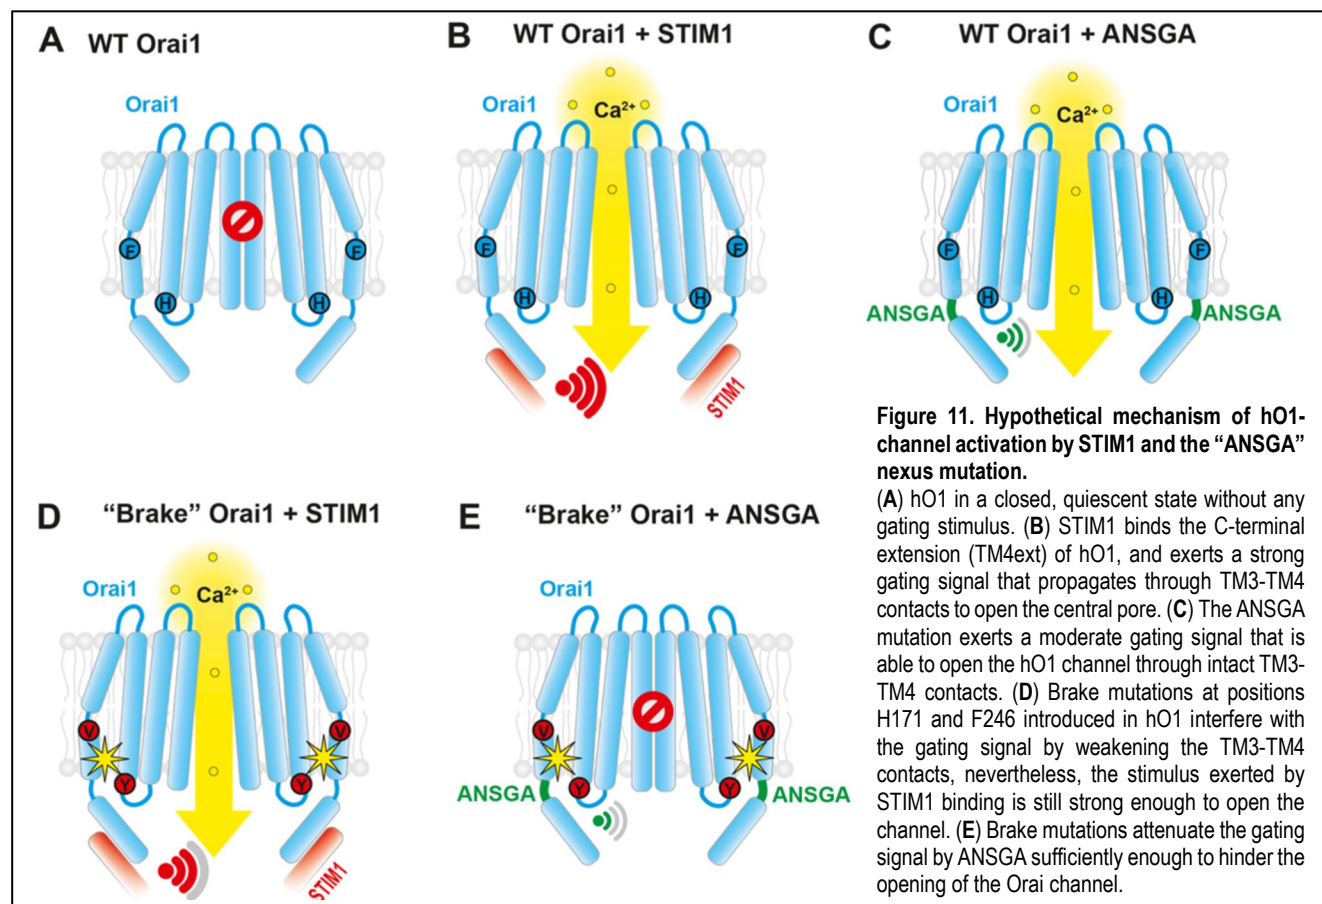

**Figure 11. Hypothetical mechanism of hO1-channel activation by STIM1 and the “ANSGA” nexus mutation.**

(A) hO1 in a closed, quiescent state without any gating stimulus. (B) STIM1 binds the C-terminal extension (TM4ext) of hO1, and exerts a strong gating signal that propagates through TM3-TM4 contacts to open the central pore. (C) The ANSGA mutation exerts a moderate gating signal that is able to open the hO1 channel through intact TM3-TM4 contacts. (D) Brake mutations at positions H171 and F246 introduced in hO1 interfere with the gating signal by weakening the TM3-TM4 contacts, nevertheless, the stimulus exerted by STIM1 binding is still strong enough to open the channel. (E) Brake mutations attenuate the gating signal by ANSGA sufficiently enough to hinder the opening of the Orai channel.

600 We envision that our results on the various Orai channel isoforms could serve as a source of information for  
601 structural biology and structure-based drug design. Structural insights into Orai1 channel activation have been  
602 generated using the *Drosophila* TM4 mutant P288L corresponding to hO1-P245L and the *Drosophila* TM2 mutant  
603 H206A corresponding to hO1-H134A (Hou et al., 2018; Hou et al., 2020; Liu et al., 2019). Our study indicates that  
604 mouse O1 ANSGA and *Xenopus* O1 ANSGA channels exhibit “intermediate-arrested” or “fully-activated” states  
605 that could be used for future structural work to gain further insights into hO1 channel activation and  
606 pharmacological inhibition. Several potent inhibitors of human Orai channels have been reported in the literature  
607 (Bakowski, Murray, & Parekh, 2021; Schild et al., 2020), but none of them exhibits remarkable Orai-subtype

Augustynek et al.

Gating mechanisms of Orai calcium channels

608 specificity. Our work could help design strategies to generate Orai structures in complex with inhibitors, as a basis  
609 of structure-based design of Orai subtype-specific channel modulators.

610 **Materials and Methods**

611 **Cloning and site-directed mutagenesis**

612 *Xenopus* Orai1 cDNA (Clone ID: 4633914, MXL1736-202771770, Horizon Discovery Ltd.) after PCR amplification  
613 was subcloned into pmCherry-C1. Human Orai2 was amplified by PCR from CFP-Orai2 peCFP-C1 provided by  
614 Prof. Christoph Romanin, University of Linz, Austria and sub-cloned into pmCherry-C1. Mouse Orai1 WT was  
615 constructed by site-directed mutagenesis-mediated generation of a stop codon after the coding sequence of Orai1  
616 in mouse WT Orai1-eGFP peGFP-N1 provided by Prof. Francisco Javier Martin-Romero, University of  
617 Extremadura, Spain. All the forward primers used for site-directed mutagenesis are mentioned in the key resources  
618 table and the reverse primers used were reverse complementary. Pfu Ultra DNA polymerase (600380, Agilent  
619 Technologies) was used for site-directed mutagenesis.

620 **CRISPR/Cas9-mediated generation and validation of STIM1/STIM2 double knockout HEK293 cells**

621 To generate STIM1/STIM2 double knockout HEK293 cells using CRISPR/Cas9 genome editing technique, we first  
622 knocked out STIM1 from HEK293 cells as described in (Butorac et al., 2019). Briefly, two different guide RNA  
623 (gRNA) were designed using the Benchling CRISPR webtool (<https://benchling.com/crispr>) that target exon 1 of  
624 STIM1. The gRNA1 (5'-TTC TGT GCC CGC GGA GAC TC-3') was chosen to target a region encoding 5'  
625 untranslated region (UTR) of STIM1 and gRNA2 (5'-GTA TGC GTC CGT CTT GCC CTG-3') to target a region  
626 encoding the signal peptide of hSTIM1. Each of the gRNAs were cloned into pX330.pgk puro vector (Harmsen,  
627 Klaasen, van de Vrugt, & Te Riele, 2018) and co-transfected into the HEK293 (ATCC® CRL-1573™) cells. The  
628 transfected cells were selected by 96 h treatment with 1.5 µg/ml puromycin. The puromycin selected HEK293 cells  
629 were then used to knock out STIM2. STIM2 gRNA1 (5'-CGG AAC CAAT GAA CGC AGC C-3') was chosen to  
630 target a region that is thought to encode an alternate longer signal peptide of hSTIM2 (Graham, Dziadek, &  
631 Johnstone, 2011), whereas gRNA2 (5'-GCT GGT AGC CGG AGC GGC GGA-3') was chosen to target the regular  
632 short signal peptide encoding sequence of hSTIM2 (Bhardwaj, Hediger, & Demaurex, 2016). STIM2 gRNA1 was  
633 cloned into BbsI-HF linearized pX330.pgk puro and gRNA2 was cloned into BbsI-HF linearized pU6-(BbsI)\_CBh-  
634 Cas9-T2A-mCherry (Addgene Plasmid #64324). After co-transfection with STIM2 gRNA1 and gRNA2 plasmids  
635 the cells were sorted by Fluorescence-Activated Cell Sorting (FACS) with mCherry fluorescence and single cells  
636 were seeded in a 96-well plate.

637 To validate the knockout, genomic DNA was extracted from the resulting single-cell-derived clones and 5'-CCT  
638 TCC GCA GGG GTG TAG T-3' forward and 5'-CTC CAA CAG CCA AAG GTC AA-3' reverse primers were used  
639 to PCR amplify a 181 bp STIM1 amplicon. Similarly, 5'-CGG AAC CAA TGA ACG CAG C-3' forward and 5'-GAG  
640 TCG AGG CGG GAT GAA G-3' reverse primers were used to obtain a 222 bp STIM2 PCR product. Western  
641 blotting was performed as described in (Bhardwaj et al., 2020). Guinea pig polyclonal hSTIM1 antibody (Ercan,  
642 Chung, Bhardwaj, & Seedorf, 2012) was used in a 1:1,000 dilution and peroxidase-conjugated affinipure goat anti-  
643 guinea pig secondary antibody (106-035-003, Jackson Immuno Research) was used in a 1:10,000 dilution. Rabbit  
644 polyclonal hSTIM2 antibody (4917S, Cell Signaling) was used in a 1:1000 dilution and horseradish peroxidase  
645 (HRP)-conjugated goat anti-rabbit secondary IgG (W401B, Promega) was used in a 1:20,000 dilution. Mouse  
646 monoclonal Tubulin antibody (T9028, Sigma-Aldrich) was used in a 1:2,000 dilution and HRP-conjugated goat  
647 anti-mouse secondary antibody was used in a 1:3,000 dilution (172-1011, Bio-Rad). Following gDNA based PCR  
648 screening and Western blotting, SOCE recordings were performed using the S1/S2 DKO clones and Clone F2  
649 was selected for further experiments.

#### 650 **FLIPR assay to measure constitutive Ca<sup>2+</sup> entry**

651 HEK293T (ATCC® CRL-3216™) and S1/S2 DKO HEK293 cells were maintained in cell culture in 1X DMEM  
652 (41965-039, Thermo Fisher Scientific) supplemented with 10% FBS, 1 mM sodium pyruvate, 10 mM HEPES, 1X  
653 MEM non-essential amino acids and 1% Penicillin-Streptomycin. The FLIPR assay to measure the constitutive  
654 Ca<sup>2+</sup> entry was adapted from our previous study (Bulla et al., 2019). Briefly, the cells were seeded in Corning® 96-  
655 well black polystyrene clear bottom microplates (CLS3603, Sigma–Aldrich) at a density of 30,000 in 100 µl medium  
656 per well. The medium contained ~0.2 mM CaCl<sub>2</sub> to prevent excessive constitutive Ca<sup>2+</sup> entry after transfection of  
657 constitutively active constructs. Since FBS is estimated to contain 3.5 – 4 mM Ca<sup>2+</sup> (Blankenship & Heitman, 2005),  
658 low Ca<sup>2+</sup> (~0.2 mM) containing medium was formulated by supplementing the Ca<sup>2+</sup> free DMEM (21068028, Thermo  
659 Fisher Scientific) with 6% FBS. Other supplements were 1 mM sodium pyruvate, 10 mM HEPES and 1X MEM  
660 non-essential amino acids. A total of 200 ng plasmid DNA was transfected per well using Lipofectamine® 2000  
661 (Thermo Fisher Scientific). The growth medium of the cells was removed 16–20 h after transfection and the cells  
662 were loaded with 50 µl of Calcium 5 indicator (FLIPR® Calcium 5 assay kit, R8186, Molecular Devices) prepared  
663 in modified Krebs buffer containing 0.2 mM CaCl<sub>2</sub>, 1 mM MgCl<sub>2</sub>, 140 mM NaCl, 4.8 mM KCl, 10 mM D-glucose and  
664 10 mM HEPES (pH 7.4). Cells were incubated in the loading buffer at 37°C for 1 h and were excited using a 470–



665 495 nm LED module of the FLIPR, and the emitted fluorescence signal was filtered with a 515–575 nm emission  
666 filter. After recording a 50 s baseline, 50  $\mu$ l of 3.8 mM  $\text{CaCl}_2$ -containing Krebs buffer was administered to the cells,  
667 resulting in 2 mM final concentration of  $\text{Ca}^{2+}$ . The changes in fluorescence intensity were measured for first 60 s  
668 after  $\text{CaCl}_2$  administration with an acquisition rate of 2 Hz and for further 180 s with 0.45 Hz. The fluorescence  
669 signals were analyzed using the FLIPR Tetra software, ScreenWorks 3.1.1.8 (Molecular Devices). To quantify the  
670 constitutive  $\text{Ca}^{2+}$  entry dedicated to each mutant, a ratio of area under the curve (AUC) of the  $\text{Ca}^{2+}$  entry traces of  
671 the mutant Orai to that of wild type was calculated.

## 672 **Electrophysiology**

673 Whole-cell patch-clamp experiments were specifically designed to measure two distinct types of inward  $\text{Ca}^{2+}$   
674 currents:

- 675 i) Canonical  $I_{\text{CRAC}}$  evoked by  $\text{IP}_3$  and facilitated by interacting hO1 and hSTIM1 molecules.
- 676 ii) Constitutive  $\text{Ca}^{2+}$  influx mediated by the selected constitutively active hO1 mutants in the absence of  
677 hSTIM1 and  $\text{IP}_3$ .

## 678 **$I_{\text{CRAC}}$ assay**

679 The experimental procedure was described in detail previously (Bhardwaj et al., 2020). Briefly, HEK293 S1/S2  
680 DKO cells were trypsinized and seeded into the 6-well plate. When cells reached confluency of approx. 70-80%,  
681 they were transiently co-transfected with plasmids encoding WT hO1 and WT STIM1. 5  $\mu$ l Lipofectamine<sup>®</sup> 2000  
682 (Thermo Fisher Scientific) and 2+2  $\mu$ g of plasmid DNA encoding the proteins were mixed in Opti-MEM<sup>™</sup> (Thermo  
683 Fisher Scientific) and applied onto the cells in a single well. After 6 h of incubation with the Lipofectamine-DNA  
684 complexes, cells were trypsinized and reseeded sparsely into the patch-clamp-compatible 35 x 10 mm cell culture  
685 petri dishes.

686  $I_{\text{CRAC}}$  was measured after further 18 h of incubation at 37 °C in humidified 5%  $\text{CO}_2$  atmosphere (24 h in total after  
687 transfection). Only cells exhibiting comparable (modest) fluorescence levels of both mCherry-Orai1 and GFP-  
688 STIM1 were selected for recordings. The experiments were performed at room temperature, in whole-cell  
689 configuration. Pipettes were pulled from 1.5 mm thin-wall borosilicate glass capillaries with filament (BF150-86-  
690 7.5, Sutter Instruments) using a horizontal P-1000 puller (Sutter Instruments) to obtain a serial resistance of around

691 2.5 M $\Omega$ . Currents were recorded with PatchMaster software (HEKA Elektronik), using an EPC-10 USB amplifier  
692 (HEKA Elektronik). Upon establishment of giga seal and successful break-in into the single, mCherry fluorescent  
693 cell, 50 ms voltage ramps spanning  $-150$  to  $+150$  mV were delivered from a holding potential of 0 mV every 2  
694 seconds. Currents were filtered at 2.9 kHz and digitized. Liquid junction potential was 10 mV and currents were  
695 determined and corrected before each voltage ramp. Leak currents were corrected by subtracting the initial ramp  
696 currents from all subsequent currents using FitMaster software (HEKA Elektronik). Currents were extracted at  $-80$   
697 and  $+80$  mV and normalized to cell capacity (size).

698 At break in, the bath solution contained 120 mM NaCl, 10 mM tetraethylammonium chloride (TEA-Cl), 2 mM MgCl<sub>2</sub>,  
699 10 mM CaCl<sub>2</sub>, 10 mM HEPES, and 32 mM glucose (pH 7.2 with NaOH, 300 mOsmol). After 60 seconds of  
700 recording, cells were perfused with nominal Ca<sup>2+</sup>-free bath solution (the same as above, but without 10 mM CaCl<sub>2</sub>,  
701 osmolarity was adjusted with more glucose).

702 Calcium-free internal solution contained 120 mM Cs-glutamate, 3 mM MgCl<sub>2</sub>, 10 mM HEPES, 0.05 mM D-myo-  
703 inositol 1,4,5-trisphosphate, trisodium salt (IP<sub>3</sub>) (407137, Calbiochem) and 20 mM EGTA (pH 7.2 with CsOH, 310  
704 mOsmol with glucose).

#### 705 ***Constitutive Ca<sup>2+</sup> influx assay***

706 This experimental approach was largely identical to the *I*<sub>CRAC</sub> assay, with two significant modifications:

- 707 i) HEK293 S1/S2 DKO cells were transfected each time only with a single plasmid encoding the relevant  
708 hO1 mutant. Unlike in the previous assay, no STIM1 was co-expressed.
- 709 ii) Calcium-free internal solution contained 120 mM Cs-glutamate, 3 mM MgCl<sub>2</sub>, 10 mM HEPES and 20  
710 mM BAPTA (B1212, Invitrogen), not EGTA (pH 7.2 with CsOH, 310 mOsmol adjusted with glucose).  
711 No IP<sub>3</sub> was added to the solution.

#### 712 **NFAT1 translocation assay**

713 Fluorescence microscopy and confocal NFAT subcellular localization studies were performed as described earlier  
714 (Schober et al., 2019). ImageJ was used to analyze subcellular NFAT localization by intensity measurements of  
715 the cytosol and the nucleus (nucleus/cytosol ratios: inactive ( $<0.85$ ), homogenous ( $0.85-1.15$ ), and active ( $>1.15$ )).  
716 All represented images of Orai isoforms as well as NFAT localization were created with a custom-made software

717 integrated into MATLAB (v7.11.0, The MathWorks, Inc.). The experiments were performed on three different days  
718 at room temperature and the resulting data of all experiments are presented as mean  $\pm$  S.D. (standard deviation)  
719 for the indicated number of experiments.

## 720 **Cell Surface Biotinylation**

721 Cell surface biotinylation was performed as described (Simonin & Fuster, 2010). Cells were rinsed with 1x PBS  
722 and surface proteins were biotinylated by incubating cells with 1.5 mg/ml sulfo-NHS-LC-biotin in 10 mM  
723 triethanolamine (pH 7.4), 1 mM MgCl<sub>2</sub>, 2 mM CaCl<sub>2</sub>, and 150 mM NaCl for 90 min with horizontal motion at 4°C.  
724 After labeling, plates were washed with quenching buffer (PBS containing 1 mM MgCl<sub>2</sub>, 0.1 mM CaCl<sub>2</sub>, and 100  
725 mM glycine) for 20 min at 4°C, then rinsed once with 1X PBS. Cells were then lysed in RIPA buffer [150 mM NaCl,  
726 50 mM Tris·HCl (pH 7.4), 5 mM EDTA, 1% Triton X-100, 0.5% deoxycholate, and 0.1% SDS] and lysates were  
727 cleared by centrifugation. Cell lysates of equivalent amounts of protein were equilibrated overnight with streptavidin  
728 agarose beads at 4°C. Beads were washed sequentially with solutions A [50 mM Tris·HCl (pH 7.4), 100 mM NaCl,  
729 and 5 mM EDTA] three times, B [50 mM Tris·HCl (pH 7.4) and 500 mM NaCl] two times, and C (50 mM Tris·HCl,  
730 pH 7.4) once. Biotinylated proteins were then released by heating to 95°C with 2.5X Lämmli buffer.

## 731 **Structural modeling**

732 The structural model of hO1 was generated using Modeller 9.21 (Fiser, Do, & Sali, 2000; Sali & Blundell, 1993;  
733 Webb & Sali, 2016) based on the closed-latched structure (PDB ID: 4HKR (Hou et al., 2012)), downloaded from  
734 the Orientations of Proteins in Membranes (OPM) database (Lomize, Lomize, Pogozheva, & Mosberg, 2006).  
735 Sequences of the template and query proteins were aligned using ClustalW 2.1 (Larkin et al., 2007). During model  
736 optimization, main chain atoms of residues 72-106, 121-143, and 235-291, roughly corresponding to the TM  
737 regions, were kept fixed in order to avoid large conformational changes. Six-fold symmetry constraints were  
738 introduced for main chain atoms of residues 99-128, 138-178, and 190-242, corresponding to loop regions and  
739 flanking TM regions. Based on PSIPRED 4.0 (Buchan, Minneci, Nugent, Bryson, & Jones, 2013; Jones, 1999),  $\alpha$ -  
740 helical constraints were introduced on residues 117-154, 164-199, and 231-286. Loop modeling protocol was  
741 applied on residues 107-120, 144-164, and 198-234. In total 50 models were built, and 10 loop modeling tries  
742 were attempted on each model. The final model was chosen based on lowest objective function values as reported

743 by Modeller for loop modeling, and visual inspection to avoid protein loops protruding into the anticipated position  
744 of the membrane bilayer.

#### 745 **Molecular dynamics (MD) simulations**

746 Simulation systems were prepared and mutations were introduced using CHARMM-GUI (Brooks et al., 2009; Jo  
747 et al., 2014; Jo, Kim, & Im, 2007; Jo, Kim, Iyer, & Im, 2008; Jo, Lim, Klauda, & Im, 2009; Lee et al., 2016; Wu et  
748 al., 2014), E190 was protonated, and truncated termini were acetylated/methylated. Two  $\text{Ca}^{2+}$  ions were introduced  
749 in the structure, one at the position determined by X-ray crystallography in the structure (PDB ID: 4HKR), and  
750 another 5 Å below along the axis of the pore. The protein was surrounded by palmitoyl-oleoyl-phosphatidylcholine  
751 (POPC) lipids in a rectangular box with size of 120.12×120.12×129.76 Å and solvated in TIP3 water with  
752 neutralizing ions and 150 mM NaCl. The simulations were performed using GPU-accelerated *pmemd* of AMBER  
753 18 (Case et al., 2018) using the CHARMM36m force-field (Huang et al., 2017), under NPT conditions, 1 bar  
754 pressure, constant surface tension of zero and a temperature of 310 K. Equilibration of simulation systems was  
755 performed as per the protocol prescribed by CHARMM-GUI. Motions of protein variants were simulated for 200 ns  
756 for 5 independent replicas each.

#### 757 **Analysis of MD trajectories**

758 Contact analysis was performed using the *analysis.distances.contact\_matrix* function of MDAnalysis (Michaud-  
759 Agrawal, Denning, Woolf, & Beckstein, 2011) (Gowers et al., 2016) on all atoms of residues, with a cut-off range  
760 of 5 Å. Inter- and intra-subunit atomic contacts in the Orai hexamer have been distinguished and counted  
761 separately. Residues were taken to be in contact if any pair of their atoms were in contact. Helicity analysis was  
762 performed by custom scripts based on MDAnalysis to calculate for each residue  $i$  the angle  $\alpha_i = \psi_i + \varphi_{i+1}$ , where  
763  $\varphi_i$  and  $\psi_i$  are the Ramachandran-angles for residue  $i$ . For residues in a perfect  $\alpha$ -helix, the value of  $\alpha = -105^\circ$ .  
764 During helicity analysis, odd (A, C, E chains with a more extended TM4-TM4ext region) and even (B, D, F chains  
765 with a helix-turn-helix/backfolded TM4-TM4ext region) subunits of the Orai hexamer were distinguished owing to  
766 the 3-fold symmetry of the starting structure. Pore diameter analysis was performed by HOLE using elements of  
767 the programming interface from MDAnalysis (Smart, Goodfellow, & Wallace, 1993; Smart, Neduvellil, Wang,  
768 Wallace, & Sansom, 1996). Pore diameters were calculated every ns of the simulations and averaged over all  
769 frames.

770 **Acknowledgements**

771 Calculations were performed on UBELIX (<http://www.id.unibe.ch/hpc>), the HPC cluster at the University of Bern.  
772 We would like to thank Dr. Stefan Mueller, Thomas Schaffer and Bernadette Nyfeler at the FACS facility, Institute  
773 of Pathology, University of Bern for their help in FACS sorting of CRISPR/Cas9-generated knockout cells. Also,  
774 we thank Tamara Locher, University of Bern for her technical assistance in cell culture. We thank Prof. Francisco  
775 Javier Martin-Romero, University of Extremadura, Spain for providing us the mO1-eGFP construct, Dr. Matthias  
776 Seedorf, Heidelberg University, Germany for providing us the mCherry-tagged hO1 and hO3 constructs and Prof.  
777 Christoph Romanin, University of Linz, Austria for providing us the CFP-hO2 construct. We are thankful to Dr.  
778 Anant B. Parekh, National Institute of Environmental Health Sciences, North Carolina, USA for providing important  
779 feedback on our manuscript. H.G. thanks Austrian Science Fund (FWF) for PhD scholarship through W1250  
780 NanoCell PhD program. I.F. was funded by FWF project P32075.-B. B.A., G.G., M.A.H. and R.B. were funded by  
781 the Swiss National Science Foundation Sinergia grants (CRS115\_180326 and CRS113\_160782). R.B. was also  
782 supported by the Marie Curie Actions International Fellowship Program IFP TransCure, University of Bern,  
783 Switzerland (from 2014 to 2017).

784 **Additional information**

785 Funding

| Funder                            | Grant reference number | Author              |
|-----------------------------------|------------------------|---------------------|
| Swiss National Science Foundation | CRS115_180326          | Matthias A. Hediger |
| Swiss National Science Foundation | CRS113_160782          | Matthias A. Hediger |
| Austrian Science Fund             | P32075.-B              | Irene Frischauf     |

The funders had no role in study design, data collection and interpretation, or the decision to submit the work for publication.

786



787 **Author contributions**

788 Bartłomiej Augustynek, Electrophysiology Experimentation, Data Analysis and Curation, Writing - original draft,  
789 Writing - review and editing; Gergely Gyimesi, Homology modeling, Molecular dynamics simulations, Data  
790 Analysis, Writing - original draft, Writing - review and editing; Jan Darnič, FLIPR Experimentation; Matthias  
791 Sallinger, NFAT1 translocation Experimentation; Giuseppe Albano, Cell surface biotinylation Experimentation;  
792 Gabriel Jonathan Klesse, Site-directed mutagenesis; Palanivel Kandasamy, CRISPR/Cas9 knockout generation;  
793 Herwig Grabmayr, NFAT1 translocation Experimentation; Irene Frischauf, Writing - original draft, Writing - review  
794 and editing; Daniel G. Fuster, Supervision, Methodology, Writing – review and editing; Christine Peinelt,  
795 Supervision, Methodology, Writing - review and editing; Matthias A. Hediger, Project Strategy, Project Coordination  
796 and Supervision, Manuscript Writing; Rajesh Bhardwaj, Conceptualization, Supervision, Validation, Investigation,  
797 Site-directed mutagenesis and FLIPR Experimentation, CRISPR/Cas9 knockout generation, Data Analysis and  
798 Curation, Visualization, Methodology, Writing - original draft, Project administration, Writing - review and editing.

799 **Author ORCIDs**

800 Bartłomiej Augustynek <https://orcid.org/0000-0002-4912-2936>

801 Gergely Gyimesi <https://orcid.org/0000-0002-2054-4633>

802 Herwig Grabmayr <https://orcid.org/0000-0003-0870-5833>

803 Palanivel Kandasamy <https://orcid.org/0000-0003-3795-2876>

804 Irene Frischauf <https://orcid.org/0000-0003-0661-2932>

805 Daniel G. Fuster <https://orcid.org/0000-0001-7220-1803>

806 Christine Peinelt <https://orcid.org/0000-0002-3474-6893>

807 Matthias A. Hediger <http://orcid.org/0000-0003-1946-027X>

808 Rajesh Bhardwaj <http://orcid.org/0000-0002-5599-487X>

809 **Supplementary Figures**

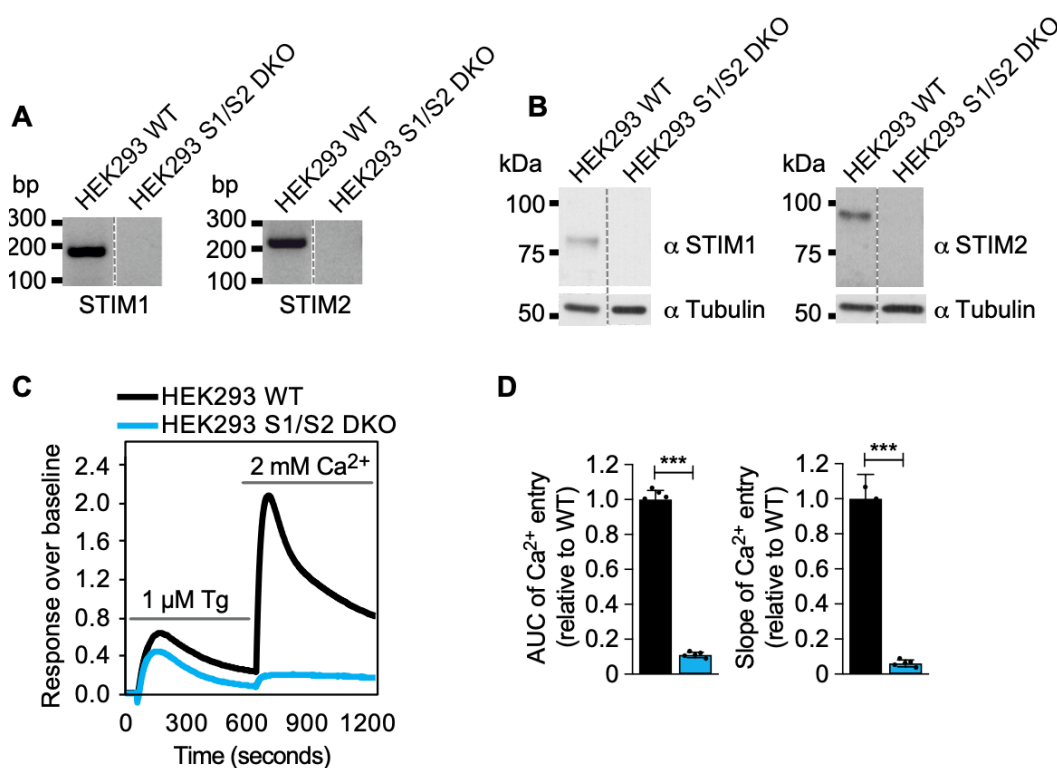

811 **Figure 2- figure supplement 1. Validation of HEK293 S1/S2 DKO cells.**

812 (A) Agarose gel electrophoresis showing PCR products of STIM1 and STIM2 using genomic DNA template isolated from HEK293 WT and  
813 S1/S2 DKO cells. (B) Western blot analysis of HEK293 WT and S1/S2 DKO cells using human STIM1 and STIM2 antibodies. (C)  
814 Representative SOCE measurement traces from HEK293 WT and S1/S2 DKO cells treated with 1  $\mu$ M thapsigargin (Tg) in nominally  
815 calcium free buffer followed by add-back of 2mM  $\text{CaCl}_2$ . (D) Quantifications of area under the curve (AUC) and slope of the  $\text{Ca}^{2+}$  entry  
816 traces (second peak in "C") represented as mean  $\pm$ SD; n=5.

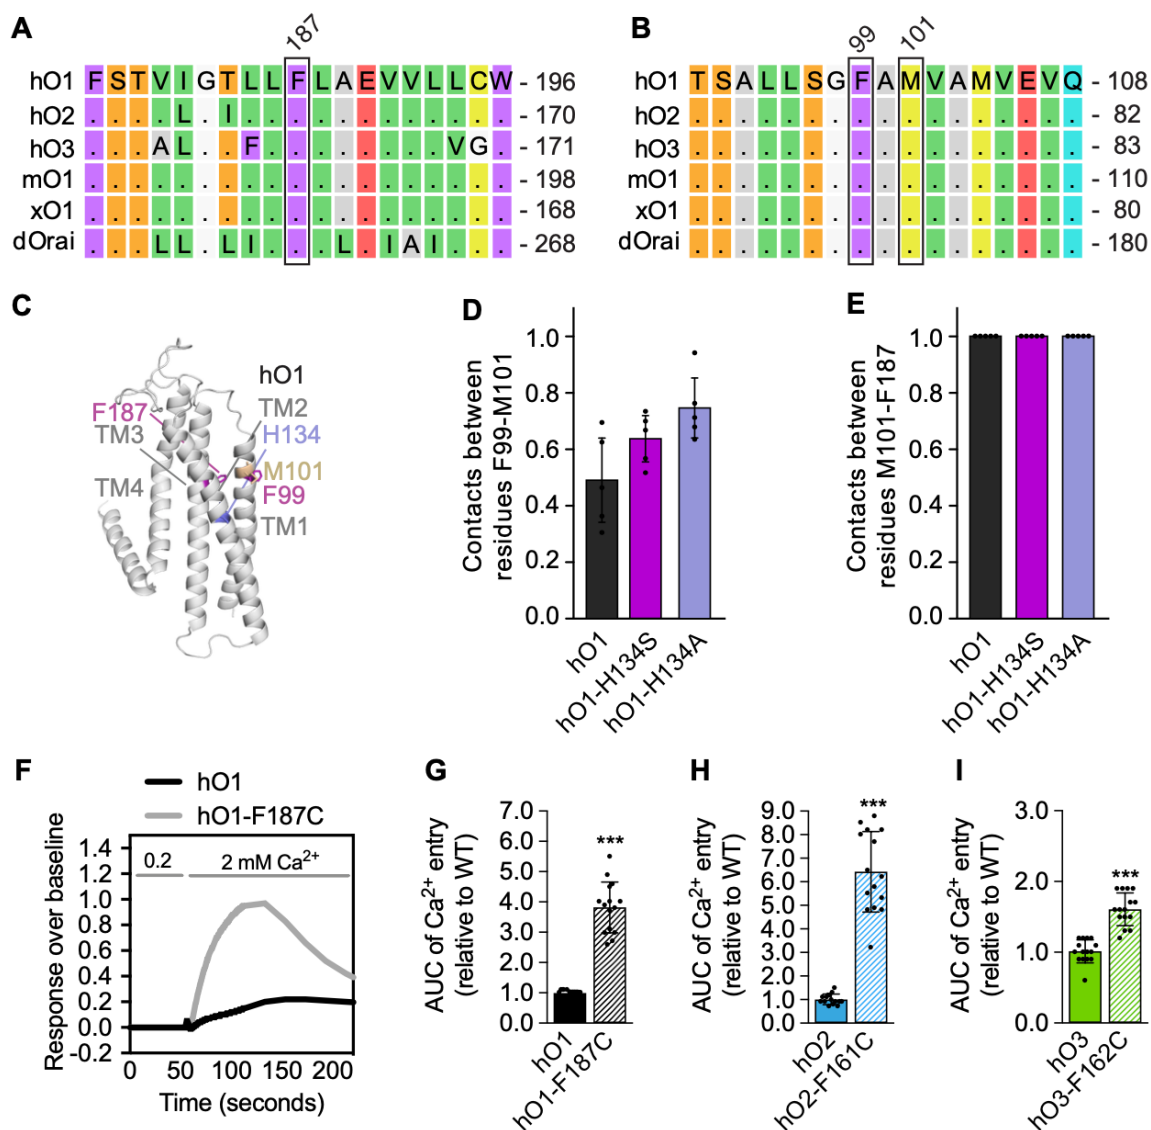

818 **Figure 2- figure supplement 2. Inter-subunit F99-M101 contacts in hO1 WT and H134 mutant, and constitutive activity of hO1 TM3**  
819 **F187C mutant and corresponding hO2 and hO3 mutants.**

820 (A) Multiple sequence alignment of TM3 of hO1, hO2, hO3, mO1, xO1 and dOrai is shown, highlighting the conserved F187 residue. (B)  
821 Multiple sequence alignment of TM1 of hO1, hO2, hO3, mO1, xO1 and dOrai is shown, highlighting the conserved F99 and M101 residue.  
822 (C) Cartoon representation of a single subunit of hO1 model depicting indicated residues. (D) Frequencies of contacts between F99 and  
823 M101 in hO1 WT, H134S and H134A mutant channels (mean ± SD; n=5). (E) Contact frequencies between M101 and F187 in WT hO1,  
824 hO1-H134S and hO1-H134A mutant channels (mean ± SD; n=5). (F) Representative constitutive Ca<sup>2+</sup> entry traces of HEK293 cells  
825 transfected with WT hO1 and hO1-F187C constructs with initial baseline recording in 0.2 mM CaCl<sub>2</sub>, followed by addition of 2 mM CaCl<sub>2</sub>.  
826 The quantified AUC of Ca<sup>2+</sup> entry peak from HEK293 cells expressing (G) WT hO1 and hO1-F187C, (H) WT hO2 and hO2-F161C and (I)  
827 WT hO3 and hO3-H162C (mean ± SD; n=15).  $p \leq 0.001$  is indicated as “\*\*\*”.

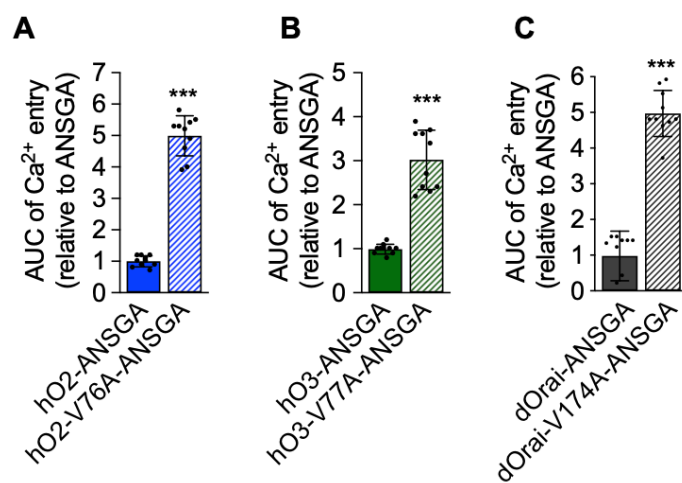

829 **Figure 3- figure supplement 1. Insertion of pore hydrophobic gate (Val) mutations in the ANSGA mutants of hO2, hO3 and dOrai**  
830 **leads to their constitutive activation.**

831 (A-C) AUC of the constitutive Ca<sup>2+</sup> entry traces from indicated Orai mutants expressed in HEK293 S1/S2 DKO cells (mean ± SD; n=10). *p*  
832 ≤ 0.001 is indicated as “\*\*\*”.

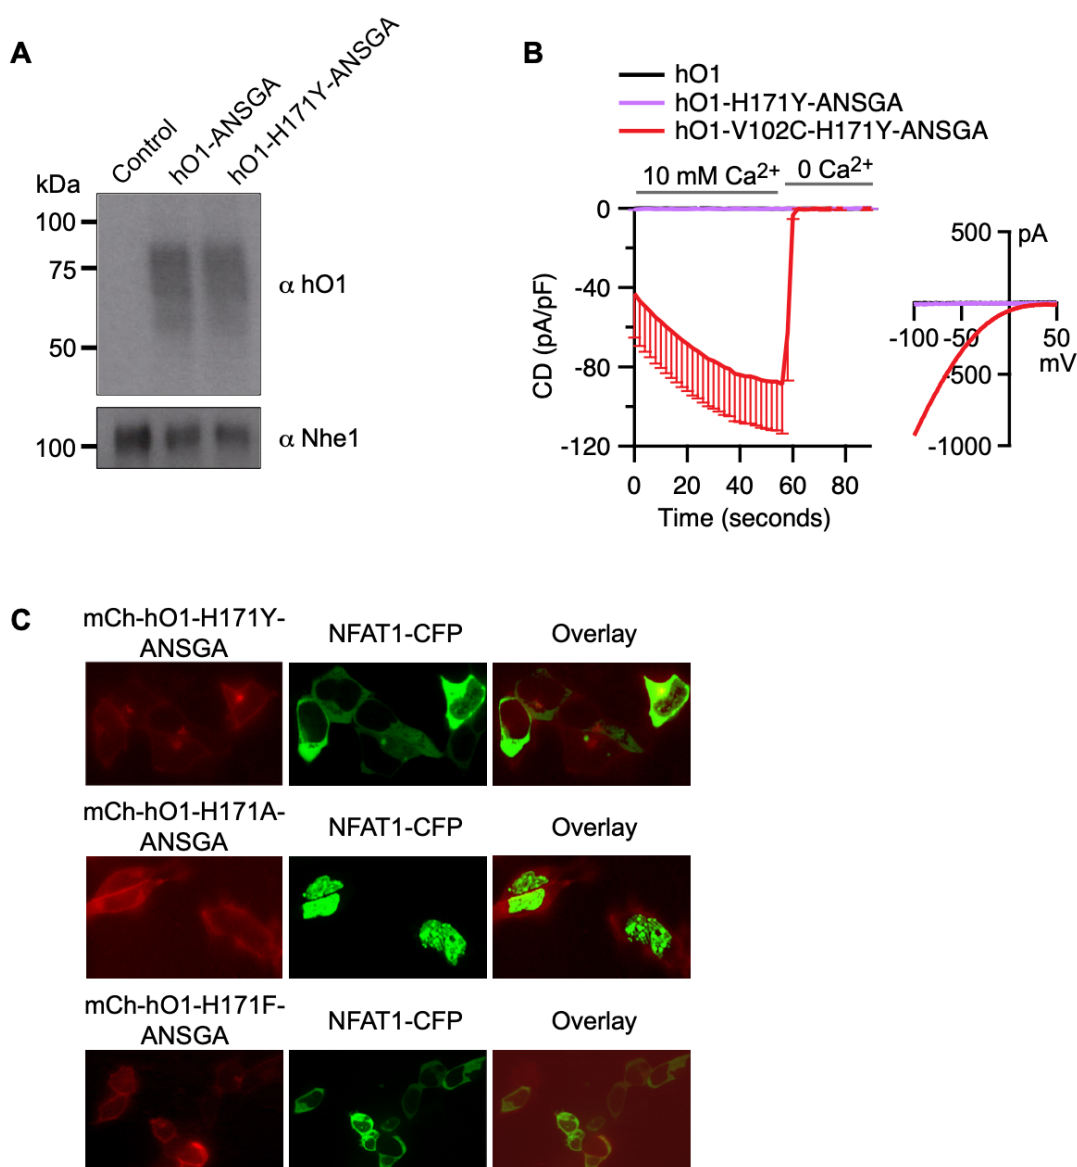

834 **Figure 4- figure supplement 1. H171Y substitution inhibits the constitutive activity of hO1-ANSGA channel without affecting the**  
835 **plasma membrane localization and assembly of the channel.**

836 (A) hO1 immunoblot of surface biotinylated mCherry control, mCherry-hO1-ANSGA and mCherry-hO1-H171Y-ANSGA proteins expressed  
837 in HEK293 S1/S2 DKO cells. Plasma membrane protein Nhe1 is shown as a loading control. (B) Current densities (CD) of the constitutive  
838 Ca<sup>2+</sup> currents recorded from HEK293 S1/S2 DKO cells transiently overexpressing: WT hO1 (n=6), hO1-H171Y-ANSGA (n=8) and hO1-  
839 V102C-H171Y-ANSGA (n=8), presented as average values, -SEM, with corresponding average current-voltage (I/V) relations extracted at  
840 t= 59s. (C) Representative confocal microscopy images of HEK293 cells co-expressing NFAT1-CFP with either mCherry-hO1-H171Y-  
841 ANSGA, hO1-H171A-ANSGA or hO1-H171F-ANSGA constructs along with the CFP/mCherry overlay images.

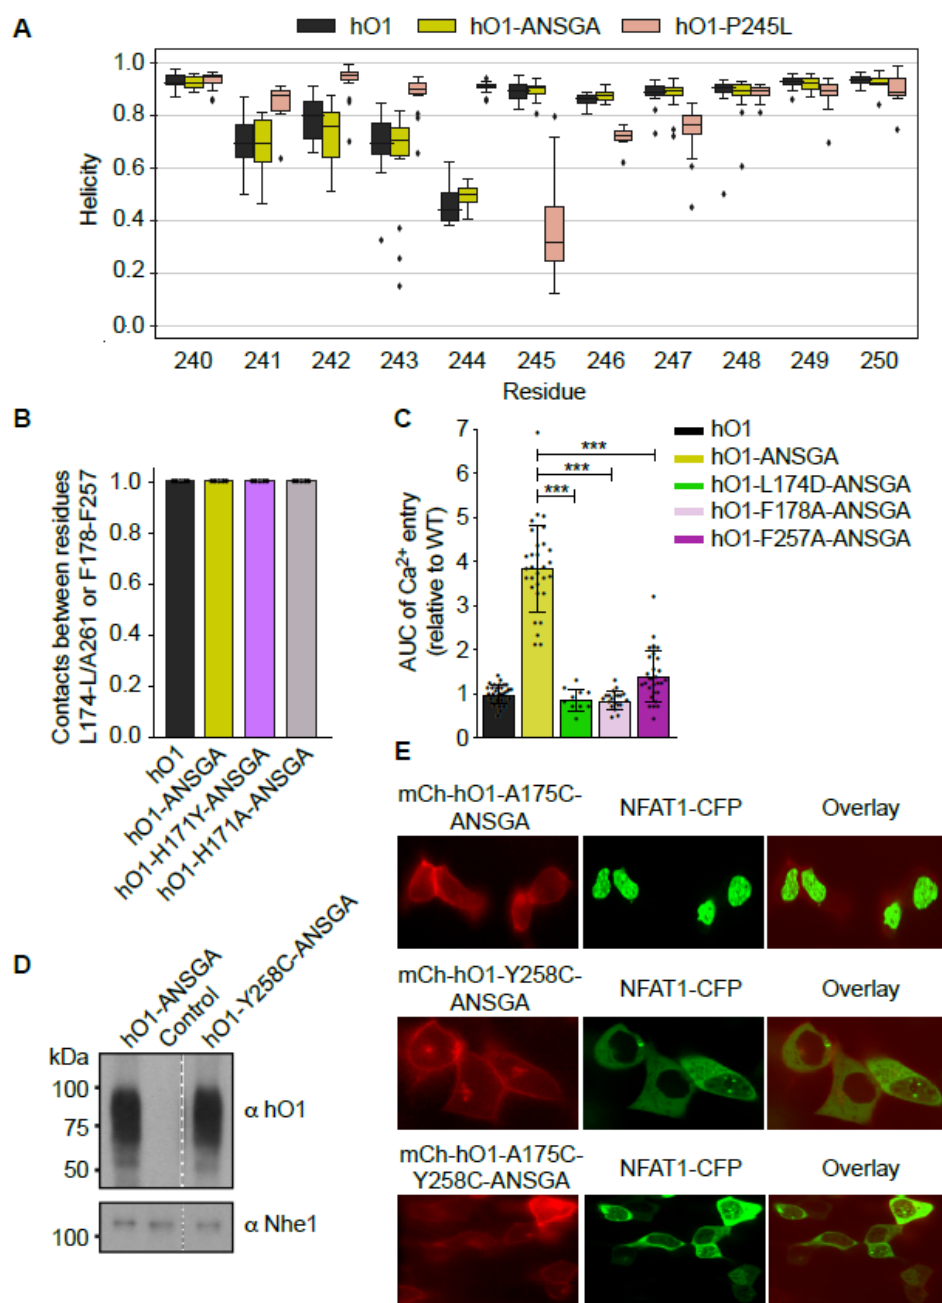

843 **Figure 5- figure supplement 1. Relevance of selected TM3 and TM4 residues in the constitutive activity of hO1-ANSGA channel.**  
 844 (A) Helicity of TM4 residues around position 245 of hO1 averaged over 5 MD trajectories for chains A, C, and E, giving 15 points per residue  
 845 and system (see Methods). Box-and-whiskers plot showing quartiles is used, outliers are plotted individually. (B) Intra-subunit contact  
 846 frequencies between residue pairs L174-L/A261 and F178-F257 averaged over each of the 5 MD trajectories are shown for various  
 847 simulation systems. Data are identical for both residue pairs. (C) The AUC of constitutive Ca<sup>2+</sup> entry recorded in HEK293 S1/S2 DKO cells  
 848 expressing mCherry-tagged WT hO1 or indicated ANSGA variants (mean ± SD; n ≥ 10).  $p \leq 0.001$  is indicated as “\*\*\*”. (D) hO1 immunoblot  
 849 of surface biotinylated mCherry control, mCherry-hO1-ANSGA and mCherry-hO1-Y258C-ANSGA proteins expressed in HEK293 S1/S2  
 850 DKO cells along with plasma membrane protein Nhe1 shown as a loading control. (E) Representative confocal microscopy images of  
 851 HEK293 cells co-expressing NFAT1-CFP and either of the indicated mCherry-Orai-ANSGA constructs along with the CFP/mCherry overlay  
 852 images.



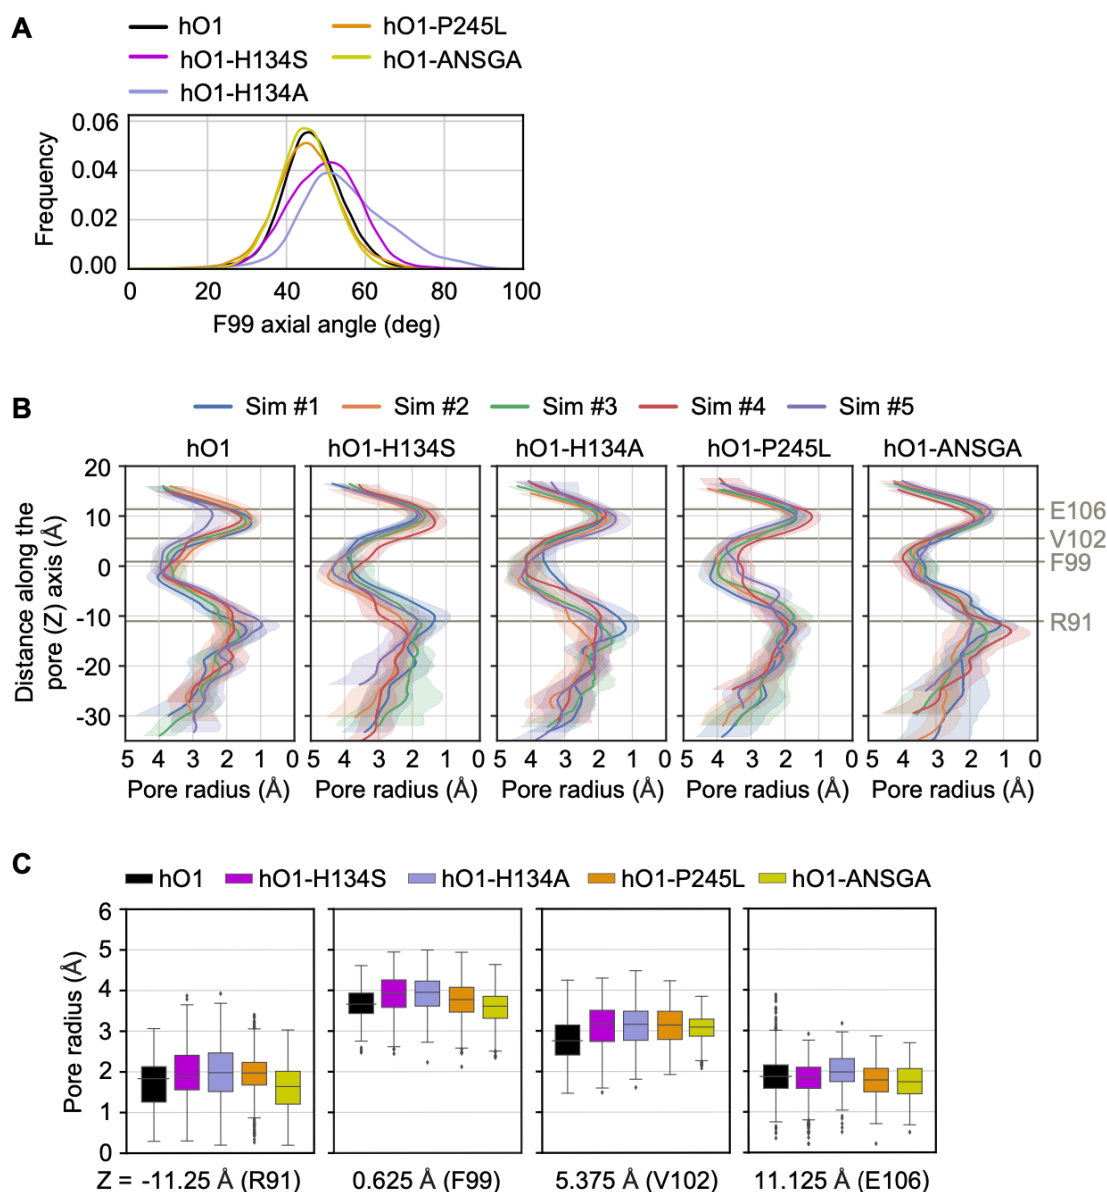

854 **Figure 5- figure supplement 2. Impact of H134S, H134A, P245L and ANSGA mutations on TM1 rotation and pore dilation.**

855 (A) Axial angle distribution of the F99 side-chain of hO1 as defined by Yamashita *et al.*, 2017 are shown (Yamashita *et al.*, 2017) for WT  
 856 hO1, hO1-H134S, hO1-H134A, hO1-P245L and hO1-ANSGA mutants. In loose terms, the axial angle measures the angle between the  
 857 pore axis, the center of mass of the  $C_{\alpha}$  atoms of residues 96-102, and the  $C_{\alpha}$  atom of residue 99. Values are averaged for all 5 MD  
 858 trajectories and for all six subunits of the Orai hexamer. (B) Pore radius as calculated by the HOLE program for each MD trajectory of  
 859 various simulation systems. Shaded regions show average and SD of pore radius. Residues of functional importance in TM1 are marked  
 860 for scale. (C) For comparison, values of pore radius along the trajectory of the Orai channel variants at cross-sections corresponding to the  
 861 positions of TM1 residues marked in panel B are shown. For each system and cross-section, pore radii for 200 frames from 5 simulations  
 862 (total 1000 points) are plotted using a box-and-whiskers plot showing quartiles and outliers.

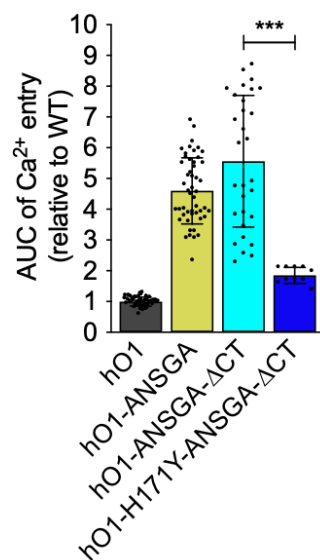

864 **Figure 6- figure supplement 1. The TM4 extension beyond the ANSGA region of hO1 is dispensable for H171Y mediated inhibition**  
865 **of constitutive activity.**

866 The quantified AUC of constitutive Ca<sup>2+</sup> entry recorded in HEK293 S1/S2 DKO cells expressing the indicated hO1-ANSGA mutants relative  
867 to the WT hO1 channel (mean ± SD; n=10).  $p \leq 0.001$  is indicated as "\*\*\*\*".

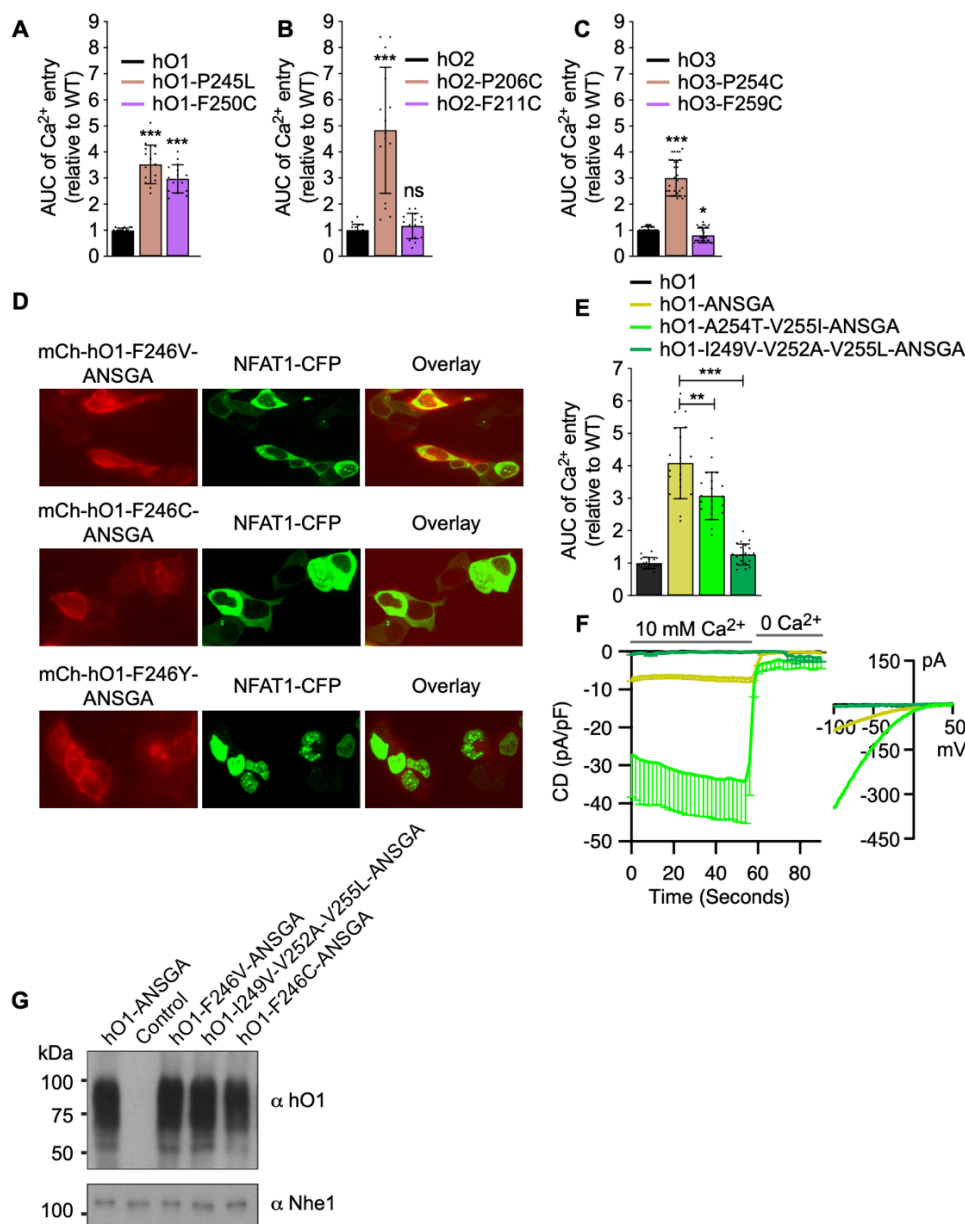

869 **Figure 7- figure supplement 1.**

870 The quantified AUC of constitutive Ca<sup>2+</sup> entry recorded in HEK293 cells expressing (A) hO1-P245L and hO1-F250C, (B) hO2-P206C and  
 871 hO2-F211C and (C) hO3-P254C and hO3-F259C relative to their respective WT Orais (mean ± SD; n ≥ 15).  $p \leq 0.001$  is indicated as “\*\*\*\*”,  
 872  $0.01 < p < 0.05$  as “\*” and  $p \geq 0.05$  as “ns”. (D) Representative confocal microscopy images of HEK293 cells co-expressing NFAT1-CFP  
 873 with either F246V, F246C or F246Y mutants of mCherry-hO1-ANSGA along with the CFP/mCherry overlay images. (E) AUC quantifications  
 874 of constitutive Ca<sup>2+</sup> influx measured in HEK293 S1/S2 DKO cells expressing hO1-ANSGA or its A254T-V255I and I249V-V252A-V255L  
 875 mutants relative to WT hO1 (mean ± SD; n=20).  $p \leq 0.001$  is indicated as “\*\*\*\*” and  $0.001 < p \leq 0.01$  as “\*\*\*”. (F) Current densities (CD) of  
 876 the constitutive Ca<sup>2+</sup> currents recorded from HEK293 S1/S2 DKO cells transiently overexpressing: WT hO1 (n=6), hO1-ANSGA (n=23),  
 877 hO1-A254T-V255I-ANSGA (n=8) and hO1-I249V-V252A-V255L-ANSGA (n=6), presented as average values, -SEM, with corresponding  
 878 average current-voltage (I/V) relations extracted at t= 59s. (G) hO1 immunoblot of surface biotinylated mCherry control, mCherry-hO1-  
 879 ANSGA and other indicated ANSGA mutant proteins expressed in HEK293 S1/S2 DKO cells. Plasma membrane protein Nhe1 is shown  
 880 as a loading control.

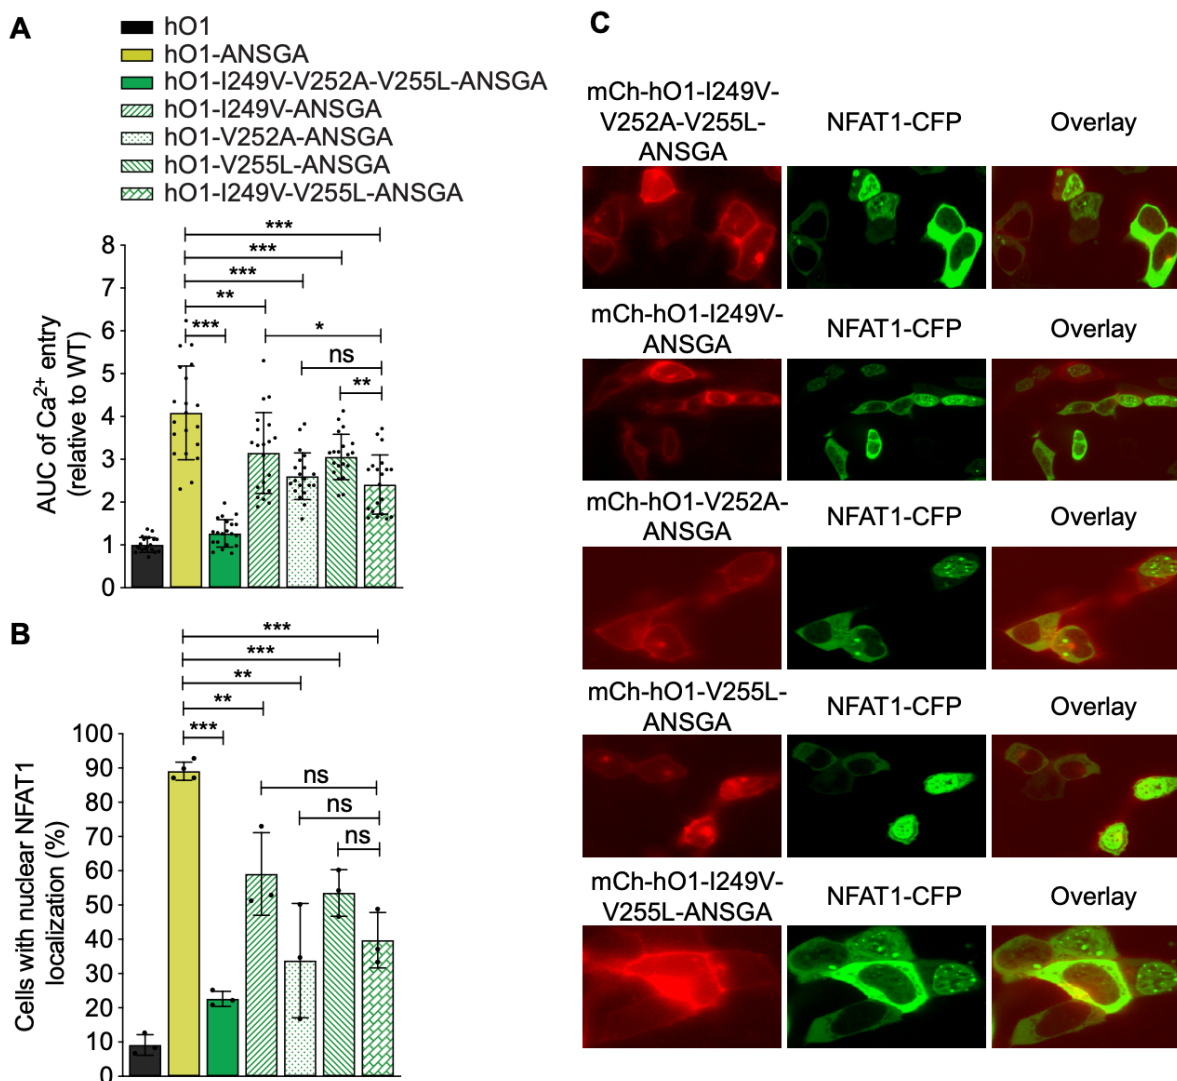

882 **Figure 7- figure supplement 2.**

883 (A) AUC quantifications of constitutive  $\text{Ca}^{2+}$  influx measured in HEK293 S1/S2 DKO cells expressing hO1-ANSGA or other indicated  
 884 mutants of hO1-ANSGA relative to WT hO1 (mean  $\pm$  SD; n=20). (B) HEK293 cells expressing mCherry-hO1, hO1-ANSGA or I249V-V252A-  
 885 V255L, I249V, V252A, V255L and I249V-V255L mutants of hO1-ANSGA with nuclear NFAT1-CFP localization shown as percentage (mean  
 886  $\pm$  SD; n  $\geq$  3).  $p \leq 0.001$  is indicated as “\*\*\*\*”,  $0.001 < p \leq 0.01$  as “\*\*\*”,  $0.01 < p < 0.05$  as “\*\*” and  $p \geq 0.05$  as “ns”. (C) Representative  
 887 confocal microscopy images of HEK293 cells co-expressing NFAT1-CFP with either mCherry-hO1, mCherry-hO1-ANSGA or indicated  
 888 mutants of mCherry-hO1-ANSGA along with the CFP/mCherry overlay images.

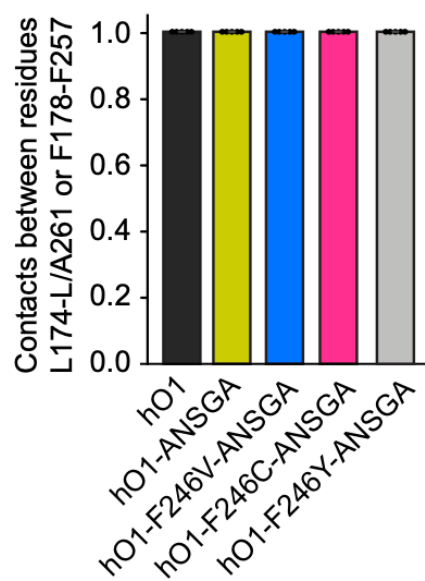

890 **Figure 8- figure supplement 1.**

891 Intra-subunit contact frequencies between residue pairs L174-L/A261 and F178-F257 averaged over each of the 5 MD trajectories are  
892 shown for various simulation systems. Data are identical for both residue pairs.

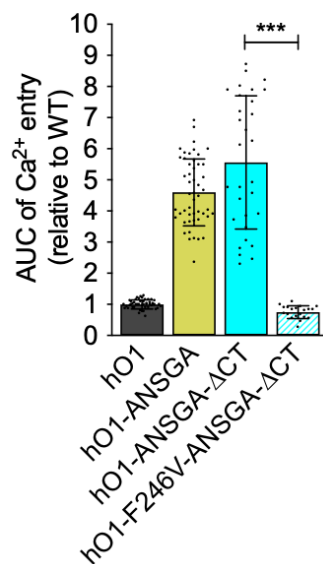

894 **Figure 9- figure supplement 1. The TM4 extension beyond the ANSGA region of hO1 is dispensable for F246V mediated inhibition**  
895 **of constitutive activity.**

896 The quantified AUC of constitutive Ca<sup>2+</sup> entry recorded in HEK293 S1/S2 DKO cells expressing the indicated hO1-ANSGA mutants relative  
897 to the WT hO1 channel (mean ± SD; n=10).  $p \leq 0.001$  is indicated as “\*\*\*”.



## References

- Alansary, D., Bogeski, I., & Niemeyer, B. A. (2015). Facilitation of Orai3 targeting and store-operated function by Orai1. *Biochim Biophys Acta*, *1853*(7), 1541-1550. doi:10.1016/j.bbamcr.2015.03.007
- Bakowski, D., Murray, F., & Parekh, A. B. (2021). Store-Operated Ca(2+) Channels: Mechanism, Function, Pharmacology, and Therapeutic Targets. *Annu Rev Pharmacol Toxicol*, *61*, 629-654. doi:10.1146/annurev-pharmtox-031620-105135
- Baraniak, J. H., Jr., Zhou, Y., Nwokonko, R. M., Jennette, M. R., Kazzaz, S. A., Stenson, J. M., . . . Gill, D. L. (2021). Orai channel C-terminal peptides are key modulators of STIM-Orai coupling and calcium signal generation. *Cell Rep*, *35*(13), 109322. doi:10.1016/j.celrep.2021.109322
- Berna-Erro, A., Jardin, I., Salido, G. M., & Rosado, J. A. (2017). Role of STIM2 in cell function and physiopathology. *J Physiol*, *595*(10), 3111-3128. doi:10.1113/JP273889
- Bhardwaj, R., Augustynek, B. S., Ercan-Herbst, E., Kandasamy, P., Seedorf, M., Peinelt, C., & Hediger, M. A. (2020). Ca(2+)/Calmodulin Binding to STIM1 Hydrophobic Residues Facilitates Slow Ca(2+)-Dependent Inactivation of the Orai1 Channel. *Cell Physiol Biochem*, *54*(2), 252-270. doi:10.33594/000000218
- Bhardwaj, R., Hediger, M. A., & Demaurex, N. (2016). Redox modulation of STIM-ORAI signaling. *Cell Calcium*, *60*(2), 142-152. doi:10.1016/j.ceca.2016.03.006
- Blankenship, J. R., & Heitman, J. (2005). Calcineurin is required for *Candida albicans* to survive calcium stress in serum. *Infect Immun*, *73*(9), 5767-5774. doi:10.1128/IAI.73.9.5767-5774.2005
- Bonhenry, D., Schober, R., & Schindl, R. (2021). Twisting gating residues in the Orai pore. *Cell Calcium*, *93*, 102323. doi:10.1016/j.ceca.2020.102323
- Brooks, B. R., Brooks, C. L., 3rd, Mackerell, A. D., Jr., Nilsson, L., Petrella, R. J., Roux, B., . . . Karplus, M. (2009). CHARMM: the biomolecular simulation program. *J Comput Chem*, *30*(10), 1545-1614. doi:10.1002/jcc.21287
- Buchan, D. W., Minneci, F., Nugent, T. C., Bryson, K., & Jones, D. T. (2013). Scalable web services for the PSIPRED Protein Analysis Workbench. *Nucleic Acids Res*, *41*(Web Server issue), W349-357. doi:10.1093/nar/gkt381
- Bulla, M., Gyimesi, G., Kim, J. H., Bhardwaj, R., Hediger, M. A., Frieden, M., & Demaurex, N. (2019). ORAI1 channel gating and selectivity is differentially altered by natural mutations in the first or third transmembrane domain. *J Physiol*, *597*(2), 561-582. doi:10.1113/JP277079
- Butorac, C., Muik, M., Derler, I., Stadlbauer, M., Lunz, V., Krizova, A., . . . Romanin, C. (2019). A novel STIM1-Orai1 gating interface essential for CRAC channel activation. *Cell Calcium*, *79*, 57-67. doi:10.1016/j.ceca.2019.02.009
- Case, D. A., Ben-Shalom, I. Y., Brozell, S. R., Cerutti, D. S., Cheatham, I., T. E., Cruzeiro, V. W. D., . . . Kollman, P. A. (2018). AMBER 2018. *University of California, San Francisco*.
- Darbellay, B., Arnaudeau, S., Bader, C. R., Konig, S., & Bernheim, L. (2011). STIM1L is a new actin-binding splice variant involved in fast repetitive Ca<sup>2+</sup> release. *J Cell Biol*, *194*(2), 335-346. doi:10.1083/jcb.201012157
- Derler, I., Butorac, C., Krizova, A., Stadlbauer, M., Muik, M., Fahrner, M., . . . Romanin, C. (2018). Authentic CRAC channel activity requires STIM1 and the conserved portion of the Orai N terminus. *J Biol Chem*, *293*(4), 1259-1270. doi:10.1074/jbc.M117.812206
- Derler, I., Plenck, P., Fahrner, M., Muik, M., Jardin, I., Schindl, R., . . . Romanin, C. (2013). The extended transmembrane Orai1 N-terminal (ETON) region combines binding interface and gate for Orai1 activation by STIM1. *J Biol Chem*, *288*(40), 29025-29034. doi:10.1074/jbc.M113.501510
- Dong, H., Zhang, Y., Song, R., Xu, J., Yuan, Y., Liu, J., . . . Klein, M. L. (2019). Toward a Model for Activation of Orai Channel. *iScience*, *16*, 356-367. doi:10.1016/j.isci.2019.05.041
- Ercan, E., Chung, S. H., Bhardwaj, R., & Seedorf, M. (2012). Di-arginine signals and the K-rich domain retain the Ca(2+)(+) sensor STIM1 in the endoplasmic reticulum. *Traffic*, *13*(7), 992-1003. doi:10.1111/j.1600-0854.2012.01359.x
- Fahrner, M., Pandey, S. K., Muik, M., Traxler, L., Butorac, C., Stadlbauer, M., . . . Derler, I. (2018). Communication between N terminus and loop2 tunes Orai activation. *J Biol Chem*, *293*(4), 1271-1285. doi:10.1074/jbc.M117.812693
- Feske, S., Gwack, Y., Prakriya, M., Srikanth, S., Puppel, S. H., Tanasa, B., . . . Rao, A. (2006). A mutation in Orai1 causes immune deficiency by abrogating CRAC channel function. *Nature*, *441*(7090), 179-185. doi:10.1038/nature04702
- Fiser, A., Do, R. K., & Sali, A. (2000). Modeling of loops in protein structures. *Protein Sci*, *9*(9), 1753-1773. doi:10.1110/ps.9.9.1753

- Frischauf, I., Litvinukova, M., Schober, R., Zayats, V., Svobodova, B., Bonhenry, D., . . . Schindl, R. (2017). Transmembrane helix connectivity in Orai1 controls two gates for calcium-dependent transcription. *Sci Signal*, *10*(507). doi:10.1126/scisignal.aao0358
- Frischauf, I., Muik, M., Derler, I., Bergsmann, J., Fahrner, M., Schindl, R., . . . Romanin, C. (2009). Molecular determinants of the coupling between STIM1 and Orai channels: differential activation of Orai1-3 channels by a STIM1 coiled-coil mutant. *J Biol Chem*, *284*(32), 21696-21706. doi:10.1074/jbc.M109.018408
- Frischauf, I., Schindl, R., Bergsmann, J., Derler, I., Fahrner, M., Muik, M., . . . Romanin, C. (2011). Cooperativeness of Orai cytosolic domains tunes subtype-specific gating. *J Biol Chem*, *286*(10), 8577-8584. doi:10.1074/jbc.M110.187179
- Fukushima, M., Tomita, T., Janoshazi, A., & Putney, J. W. (2012). Alternative translation initiation gives rise to two isoforms of Orai1 with distinct plasma membrane mobilities. *J Cell Sci*, *125*(Pt 18), 4354-4361. doi:10.1242/jcs.104919
- Gowers, R. J., Linke, M., Barnoud, J., Reddy, T. J. E., Melo, M. N., Seyler, S. L., . . . Beckstein, O. (2016). MDAnalysis: A Python package for the rapid analysis of molecular dynamics simulations. . In S. Benthall and S. Rostrup, editors, *Proceedings of the 15th Python in Science Conference*, 98-105. doi:10.25080/Majora-629e541a-00e
- Graham, S. J., Dziadek, M. A., & Johnstone, L. S. (2011). A cytosolic STIM2 preprotein created by signal peptide inefficiency activates ORAI1 in a store-independent manner. *J Biol Chem*, *286*(18), 16174-16185. doi:10.1074/jbc.M110.206946
- Harmsen, T., Klaasen, S., van de Vrugt, H., & Te Riele, H. (2018). DNA mismatch repair and oligonucleotide end-protection promote base-pair substitution distal from a CRISPR/Cas9-induced DNA break. *Nucleic Acids Res*, *46*(6), 2945-2955. doi:10.1093/nar/gky076
- He, L., Wang, L., Zeng, H., Tan, P., Ma, G., Zheng, S., . . . Zhou, Y. (2021). Engineering of a bona fide light-operated calcium channel. *Nat Commun*, *12*(1), 164. doi:10.1038/s41467-020-20425-4
- Hou, X., Burstein, S. R., & Long, S. B. (2018). Structures reveal opening of the store-operated calcium channel Orai. *Elife*, *7*. doi:10.7554/eLife.36758
- Hou, X., Outhwaite, I. R., Pedi, L., & Long, S. B. (2020). Cryo-EM structure of the calcium release-activated calcium channel Orai in an open conformation. *Elife*, *9*. doi:10.7554/eLife.62772
- Hou, X., Pedi, L., Diver, M. M., & Long, S. B. (2012). Crystal structure of the calcium release-activated calcium channel Orai. *Science*, *338*(6112), 1308-1313. doi:10.1126/science.1228757
- Huang, J., Rauscher, S., Nawrocki, G., Ran, T., Feig, M., de Groot, B. L., . . . MacKerell, A. D., Jr. (2017). CHARMM36m: an improved force field for folded and intrinsically disordered proteins. *Nat Methods*, *14*(1), 71-73. doi:10.1038/nmeth.4067
- Jo, S., Cheng, X., Islam, S. M., Huang, L., Rui, H., Zhu, A., . . . Im, W. (2014). CHARMM-GUI PDB manipulator for advanced modeling and simulations of proteins containing nonstandard residues. *Adv Protein Chem Struct Biol*, *96*, 235-265. doi:10.1016/bs.apcsb.2014.06.002
- Jo, S., Kim, T., & Im, W. (2007). Automated builder and database of protein/membrane complexes for molecular dynamics simulations. *PLoS One*, *2*(9), e880. doi:10.1371/journal.pone.0000880
- Jo, S., Kim, T., Iyer, V. G., & Im, W. (2008). CHARMM-GUI: a web-based graphical user interface for CHARMM. *J Comput Chem*, *29*(11), 1859-1865. doi:10.1002/jcc.20945
- Jo, S., Lim, J. B., Klauda, J. B., & Im, W. (2009). CHARMM-GUI Membrane Builder for mixed bilayers and its application to yeast membranes. *Biophys J*, *97*(1), 50-58. doi:10.1016/j.bpj.2009.04.013
- Jones, D. T. (1999). Protein secondary structure prediction based on position-specific scoring matrices. *J Mol Biol*, *292*(2), 195-202. doi:10.1006/jmbi.1999.3091
- Kar, P., Lin, Y. P., Bhardwaj, R., Tucker, C. J., Bird, G. S., Hediger, M. A., . . . Parekh, A. B. (2021). The N terminus of Orai1 couples to the AKAP79 signaling complex to drive NFAT1 activation by local Ca(2+) entry. *Proc Natl Acad Sci U S A*, *118*(19). doi:10.1073/pnas.2012908118
- Kim, K. M., Wijerathne, T., Hur, J. H., Kang, U. J., Kim, I. H., Kweon, Y. C., . . . Park, C. Y. (2018). Distinct gating mechanism of SOC channel involving STIM-Orai coupling and an intramolecular interaction of Orai in *Caenorhabditis elegans*. *Proc Natl Acad Sci U S A*, *115*(20), E4623-E4632. doi:10.1073/pnas.1714986115
- Knapp, M. L., Förderer, K., Alansary, D., Jung, M., Schwarz, Y., Lis, A., & Niemeyer, B. (2020). Alternative splicing switches STIM1 targeting to specialized membrane contact sites and modifies SOCE. *bioRxiv*. doi:<https://doi.org/10.1101/2020.03.25.005199>
- Krizova, A., Maltan, L., & Derler, I. (2019). Critical parameters maintaining authentic CRAC channel hallmarks. *Eur Biophys J*, *48*(5), 425-445. doi:10.1007/s00249-019-01355-6

- Larkin, M. A., Blackshields, G., Brown, N. P., Chenna, R., McGettigan, P. A., McWilliam, H., . . . Higgins, D. G. (2007). Clustal W and Clustal X version 2.0. *Bioinformatics*, 23(21), 2947-2948. doi:10.1093/bioinformatics/btm404
- Lee, J., Cheng, X., Swails, J. M., Yeom, M. S., Eastman, P. K., Lemkul, J. A., . . . Im, W. (2016). CHARMM-GUI Input Generator for NAMD, GROMACS, AMBER, OpenMM, and CHARMM/OpenMM Simulations Using the CHARMM36 Additive Force Field. *J Chem Theory Comput*, 12(1), 405-413. doi:10.1021/acs.jctc.5b00935
- Li, S., Yao, M., Niu, C., Liu, D., Tang, Z., Gu, C., . . . Wu, F. (2019). Inhibition of MCF-7 breast cancer cell proliferation by a synthetic peptide derived from the C-terminal sequence of Orai channel. *Biochem Biophys Res Commun*, 516(4), 1066-1072. doi:10.1016/j.bbrc.2019.06.153
- Li, Z., Liu, L., Deng, Y., Ji, W., Du, W., Xu, P., . . . Xu, T. (2011). Graded activation of CRAC channel by binding of different numbers of STIM1 to Orai1 subunits. *Cell Res*, 21(2), 305-315. doi:10.1038/cr.2010.131
- Li, Z., Lu, J., Xu, P., Xie, X., Chen, L., & Xu, T. (2007). Mapping the interacting domains of STIM1 and Orai1 in Ca<sup>2+</sup> release-activated Ca<sup>2+</sup> channel activation. *J Biol Chem*, 282(40), 29448-29456. doi:10.1074/jbc.M703573200
- Liou, J., Kim, M. L., Heo, W. D., Jones, J. T., Myers, J. W., Ferrell, J. E., Jr., & Meyer, T. (2005). STIM is a Ca<sup>2+</sup> sensor essential for Ca<sup>2+</sup>-store-depletion-triggered Ca<sup>2+</sup> influx. *Curr Biol*, 15(13), 1235-1241. doi:10.1016/j.cub.2005.05.055
- Lis, A., Peinelt, C., Beck, A., Parvez, S., Monteilh-Zoller, M., Fleig, A., & Penner, R. (2007). CRACM1, CRACM2, and CRACM3 are store-operated Ca<sup>2+</sup> channels with distinct functional properties. *Curr Biol*, 17(9), 794-800. doi:10.1016/j.cub.2007.03.065
- Lis, A., Zierler, S., Peinelt, C., Fleig, A., & Penner, R. (2010). A single lysine in the N-terminal region of store-operated channels is critical for STIM1-mediated gating. *J Gen Physiol*, 136(6), 673-686. doi:10.1085/jgp.201010484
- Liu, X., Wu, G., Yu, Y., Chen, X., Ji, R., Lu, J., . . . Shen, Y. (2019). Molecular understanding of calcium permeation through the open Orai channel. *PLoS Biol*, 17(4), e3000096. doi:10.1371/journal.pbio.3000096
- Lomize, M. A., Lomize, A. L., Pogozheva, I. D., & Mosberg, H. I. (2006). OPM: orientations of proteins in membranes database. *Bioinformatics*, 22(5), 623-625. doi:10.1093/bioinformatics/btk023
- McNally, B. A., Somasundaram, A., Jairaman, A., Yamashita, M., & Prakriya, M. (2013). The C- and N-terminal STIM1 binding sites on Orai1 are required for both trapping and gating CRAC channels. *J Physiol*, 591(11), 2833-2850. doi:10.1113/jphysiol.2012.250456
- McNally, B. A., Somasundaram, A., Yamashita, M., & Prakriya, M. (2012). Gated regulation of CRAC channel ion selectivity by STIM1. *Nature*, 482(7384), 241-245. doi:10.1038/nature10752
- Mercer, J. C., Dehaven, W. I., Smyth, J. T., Wedel, B., Boyles, R. R., Bird, G. S., & Putney, J. W., Jr. (2006). Large store-operated calcium selective currents due to co-expression of Orai1 or Orai2 with the intracellular calcium sensor, Stim1. *J Biol Chem*, 281(34), 24979-24990. doi:10.1074/jbc.M604589200
- Michaud-Agrawal, N., Denning, E. J., Woolf, T. B., & Beckstein, O. (2011). MDAAnalysis: a toolkit for the analysis of molecular dynamics simulations. *J Comput Chem*, 32(10), 2319-2327. doi:10.1002/jcc.21787
- Miederer, A. M., Alansary, D., Schwar, G., Lee, P. H., Jung, M., Helms, V., & Niemeyer, B. A. (2015). A STIM2 splice variant negatively regulates store-operated calcium entry. *Nat Commun*, 6, 6899. doi:10.1038/ncomms7899
- Muik, M., Frischauf, I., Derler, I., Fahrner, M., Bergsmann, J., Eder, P., . . . Romanin, C. (2008). Dynamic coupling of the putative coiled-coil domain of ORAI1 with STIM1 mediates ORAI1 channel activation. *J Biol Chem*, 283(12), 8014-8022. doi:10.1074/jbc.M708898200
- Navarro-Borelly, L., Somasundaram, A., Yamashita, M., Ren, D., Miller, R. J., & Prakriya, M. (2008). STIM1-Orai1 interactions and Orai1 conformational changes revealed by live-cell FRET microscopy. *J Physiol*, 586(22), 5383-5401. doi:10.1113/jphysiol.2008.162503
- Nesin, V., Wiley, G., Kousi, M., Ong, E. C., Lehmann, T., Nicholl, D. J., . . . Tsiokas, L. (2014). Activating mutations in STIM1 and ORAI1 cause overlapping syndromes of tubular myopathy and congenital miosis. *Proc Natl Acad Sci U S A*, 111(11), 4197-4202. doi:10.1073/pnas.1312520111
- Niemeyer, B. A. (2016). Changing calcium: CRAC channel (STIM and Orai) expression, splicing, and posttranslational modifiers. *Am J Physiol Cell Physiol*, 310(9), C701-709. doi:10.1152/ajpcell.00034.2016
- Niu, L., Wu, F., Li, K., Li, J., Zhang, S. L., Hu, J., & Wang, Q. (2020). STIM1 interacts with termini of Orai channels in a sequential manner. *J Cell Sci*, 133(8). doi:10.1242/jcs.239491
- Palty, R., Stanley, C., & Isacoff, E. Y. (2015). Critical role for Orai1 C-terminal domain and TM4 in CRAC channel gating. *Cell Res*, 25(8), 963-980. doi:10.1038/cr.2015.80



- Park, C. Y., Hoover, P. J., Mullins, F. M., Bachhawat, P., Covington, E. D., Raunser, S., . . . Lewis, R. S. (2009). STIM1 clusters and activates CRAC channels via direct binding of a cytosolic domain to Orai1. *Cell*, *136*(5), 876-890. doi:10.1016/j.cell.2009.02.014
- Prakriya, M., Feske, S., Gwack, Y., Srikanth, S., Rao, A., & Hogan, P. G. (2006). Orai1 is an essential pore subunit of the CRAC channel. *Nature*, *443*(7108), 230-233. doi:10.1038/nature05122
- Ramesh, G., Jarzembowski, L., Schwarz, Y., Poth, V., Konrad, M., Knapp, M. L., . . . Niemeyer, B. A. (2021). A short isoform of STIM1 confers frequency-dependent synaptic enhancement. *Cell Rep*, *34*(11), 108844. doi:10.1016/j.celrep.2021.108844
- Rana, A., Yen, M., Sadaghiani, A. M., Malmersjo, S., Park, C. Y., Dolmetsch, R. E., & Lewis, R. S. (2015). Alternative splicing converts STIM2 from an activator to an inhibitor of store-operated calcium channels. *J Cell Biol*, *209*(5), 653-669. doi:10.1083/jcb.201412060
- Roos, J., DiGregorio, P. J., Yeromin, A. V., Ohlsen, K., Lioudyno, M., Zhang, S., . . . Stauderman, K. A. (2005). STIM1, an essential and conserved component of store-operated Ca<sup>2+</sup> channel function. *J Cell Biol*, *169*(3), 435-445. doi:10.1083/jcb.200502019
- Sali, A., & Blundell, T. L. (1993). Comparative protein modelling by satisfaction of spatial restraints. *J Mol Biol*, *234*(3), 779-815. doi:10.1006/jmbi.1993.1626
- Schild, A., Bhardwaj, R., Wenger, N., Tscherrig, D., Kandasamy, P., Deric, J., . . . Lochner, M. (2020). Synthesis and Pharmacological Characterization of 2-Aminoethyl Diphenylborinate (2-APB) Derivatives for Inhibition of Store-Operated Calcium Entry (SOCE) in MDA-MB-231 Breast Cancer Cells. *Int J Mol Sci*, *21*(16). doi:10.3390/ijms21165604
- Schober, R., Bonhenry, D., Lunz, V., Zhu, J., Krizova, A., Frischauf, I., . . . Schindl, R. (2019). Sequential activation of STIM1 links Ca(2+) with luminal domain unfolding. *Sci Signal*, *12*(608). doi:10.1126/scisignal.aax3194
- Simonin, A., & Fuster, D. (2010). Nedd4-1 and beta-arrestin-1 are key regulators of Na<sup>+</sup>/H<sup>+</sup> exchanger 1 ubiquitylation, endocytosis, and function. *J Biol Chem*, *285*(49), 38293-38303. doi:10.1074/jbc.M110.115089
- Smart, O. S., Goodfellow, J. M., & Wallace, B. A. (1993). The pore dimensions of gramicidin A. *Biophys J*, *65*(6), 2455-2460. doi:10.1016/S0006-3495(93)81293-1
- Smart, O. S., Neduvellil, J. G., Wang, X., Wallace, B. A., & Sansom, M. S. (1996). HOLE: a program for the analysis of the pore dimensions of ion channel structural models. *J Mol Graph*, *14*(6), 354-360, 376. doi:10.1016/s0263-7855(97)00009-x
- Tiffner, A., Maltan, L., Fahrner, M., Sallinger, M., Weiss, S., Grabmayr, H., . . . Derler, I. (2021). Transmembrane Domain 3 (TM3) Governs Orai1 and Orai3 Pore Opening in an Isoform-Specific Manner. *Front Cell Dev Biol*, *9*, 635705. doi:10.3389/fcell.2021.635705
- Tiffner, A., Schober, R., Hoeglinger, C., Bonhenry, D., Pandey, S., Lunz, V., . . . Derler, I. (2020). CRAC channel opening is determined by a series of Orai1 gating checkpoints in the transmembrane and cytosolic regions. *J Biol Chem*. doi:10.1074/jbc.RA120.015548
- Tirado-Lee, L., Yamashita, M., & Prakriya, M. (2015). Conformational Changes in the Orai1 C-Terminus Evoked by STIM1 Binding. *PLoS One*, *10*(6), e0128622. doi:10.1371/journal.pone.0128622
- Vig, M., Peinelt, C., Beck, A., Koomoa, D. L., Rabah, D., Koblan-Huberson, M., . . . Kinet, J. P. (2006). CRACM1 is a plasma membrane protein essential for store-operated Ca<sup>2+</sup> entry. *Science*, *312*(5777), 1220-1223. doi:10.1126/science.1127883
- Webb, B., & Sali, A. (2016). Comparative Protein Structure Modeling Using MODELLER. *Curr Protoc Bioinformatics*, *54*, 5 6 1-5 6 37. doi:10.1002/cpbi.3
- Wu, E. L., Cheng, X., Jo, S., Rui, H., Song, K. C., Davila-Contreras, E. M., . . . Im, W. (2014). CHARMM-GUI Membrane Builder toward realistic biological membrane simulations. *J Comput Chem*, *35*(27), 1997-2004. doi:10.1002/jcc.23702
- Yamashita, M., Yeung, P. S., Ing, C. E., McNally, B. A., Pomes, R., & Prakriya, M. (2017). STIM1 activates CRAC channels through rotation of the pore helix to open a hydrophobic gate. *Nat Commun*, *8*, 14512. doi:10.1038/ncomms14512
- Yeung, P. S., Ing, C. E., Yamashita, M., Pomes, R., & Prakriya, M. (2020). A sulfur-aromatic gate latch is essential for opening of the Orai1 channel pore. *Elife*, *9*. doi:10.7554/eLife.60751
- Yeung, P. S., Yamashita, M., Ing, C. E., Pomes, R., Freymann, D. M., & Prakriya, M. (2018). Mapping the functional anatomy of Orai1 transmembrane domains for CRAC channel gating. *Proc Natl Acad Sci U S A*, *115*(22), E5193-E5202. doi:10.1073/pnas.1718373115
- Yeung, P. S., Yamashita, M., & Prakriya, M. (2020). Molecular basis of allosteric Orai1 channel activation by STIM1. *J Physiol*, *598*(9), 1707-1723. doi:10.1113/JP276550
- Zheng, H., Zhou, M. H., Hu, C., Kuo, E., Peng, X., Hu, J., . . . Zhang, S. L. (2013). Differential roles of the C and N termini of Orai1 protein in interacting with stromal interaction molecule 1 (STIM1) for Ca<sup>2+</sup> release-

Augustynek et al.

Gating mechanisms of Orai calcium channels

activated Ca<sup>2+</sup> (CRAC) channel activation. *J Biol Chem*, 288(16), 11263-11272. doi:10.1074/jbc.M113.450254

Zhou, L., Chi, X., Zhu, Y., Zhang, T., Liu, J., Ma, G., . . . Wang, Y. (2018). Digitoxin Suppresses Store Operated Calcium Entry by Modulating Phosphorylation and the Pore Region of Orai1. *Curr Mol Med*, 18(6), 392-399. doi:10.2174/1566524018666181113111316

Zhou, Y., Cai, X., Loktionova, N. A., Wang, X., Nwokonko, R. M., Wang, X., . . . Gill, D. L. (2016). The STIM1-binding site nexus remotely controls Orai1 channel gating. *Nat Commun*, 7, 13725. doi:10.1038/ncomms13725

Zhou, Y., Nwokonko, R. M., Baraniak, J. H., Jr., Trebak, M., Lee, K. P. K., & Gill, D. L. (2019). The remote allosteric control of Orai channel gating. *PLoS Biol*, 17(8), e3000413. doi:10.1371/journal.pbio.3000413

**Key resources table**

| Reagent type<br>(species) or<br>resource | Designation                                                                  | Source or<br>reference      | Identifiers        | Additional information |
|------------------------------------------|------------------------------------------------------------------------------|-----------------------------|--------------------|------------------------|
| Gene <i>Drosophila melanogaster</i>      | <i>ORAI</i>                                                                  | NCBI                        | Gene ID:<br>37040  |                        |
| Gene <i>Xenopus laevis</i>               | <i>orai1</i>                                                                 | NCBI                        | Gene ID:<br>403390 |                        |
| Gene (Mouse)                             | <i>Orai1</i>                                                                 | NCBI                        | Gene ID:<br>109305 |                        |
| Gene (Human)                             | <i>ORAI1</i>                                                                 | NCBI                        | Gene ID:<br>84876  |                        |
| Gene (Human)                             | <i>ORAI2</i>                                                                 | NCBI                        | Gene ID:<br>80228  |                        |
| Gene (Human)                             | <i>ORAI3</i>                                                                 | NCBI                        | Gene ID:<br>93129  |                        |
| Gene (Human)                             | <i>STIM1</i>                                                                 | NCBI                        | Gene ID:<br>6786   |                        |
| Cell line<br>( <i>Homo sapiens</i> )     | HEK-293                                                                      | ATCC                        | CRL-1573           |                        |
| Cell line<br>( <i>Homo sapiens</i> )     | HEK-293T                                                                     | ATCC                        | CRL-3216           |                        |
| Chemical<br>compound, drug               | Opti-MEM                                                                     | Thermo Fisher<br>Scientific | Cat#<br>11058021   |                        |
| Chemical<br>compound, drug               | Lipofectamine 2000<br>Transfection Reagent                                   | Thermo Fisher<br>Scientific | Cat#<br>11668019   |                        |
| Chemical<br>compound, drug               | Dulbecco's Modified<br>Eagle's Medium - high<br>glucose                      | Thermo Fisher<br>Scientific | Cat#<br>41965-039  |                        |
| Chemical<br>compound, drug               | Dulbecco's Modified<br>Eagle's Medium - high<br>glucose, no calcium          | Thermo Fisher<br>Scientific | Cat#<br>21068028   |                        |
| Chemical<br>compound, drug               | Fetal Bovine Serum<br>(FBS)                                                  | Merck                       | Cat#<br>F7524      |                        |
| Chemical<br>compound, drug               | MEM Non-essential<br>Amino Acid Solution<br>(100X)                           | Merck                       | Cat#<br>M7145      |                        |
| Chemical<br>compound, drug               | Poly-D-lysine<br>hydrobromide                                                | Merck                       | Cat#<br>P6407      |                        |
| Chemical<br>compound, drug               | Penicillin-Streptomycin                                                      | Merck                       | Cat#<br>P4333      |                        |
| Chemical<br>compound, drug               | HEPES solution                                                               | Merck                       | Cat#<br>H0887      |                        |
| Chemical<br>compound, drug               | Ampicillin                                                                   | AppliChem                   | Cat#<br>A0839      |                        |
| Chemical<br>compound, drug               | D-myo-inositol 1,<br>4,5-trisphosphate,<br>trisodium salt (IP <sub>3</sub> ) | Calbiochem                  | Cat#<br>407137     |                        |
| Chemical<br>compound, drug               | Pfu Ultra High-fidelity<br>DNA Polymerase                                    | Agilent<br>Technologies     | Cat#<br>600380     |                        |
| Chemical<br>compound, drug               | BbsI-HF <sup>®</sup> restriction<br>enzyme                                   | New England<br>BioLabs Inc. | Cat#<br>R3539S     |                        |
| Chemical<br>compound, drug               | T4 DNA Ligase                                                                | New England<br>BioLabs Inc. | Cat#<br>M0202S     |                        |
| Commercial assay<br>or kit               | FLIPR Calcium 5                                                              | Molecular<br>Devices        | Cat#<br>R8186      |                        |
| Commercial assay<br>or kit               | Corning 96 Well Black<br>Polystyrene Microplate                              | Merck                       | Cat#<br>CLS3603    |                        |
| Recombinant<br>DNA reagent               | pU6-(BbsI)_CBh-<br>Cas9-T2A-mCherry<br>CRISPR plasmid                        | Addgene                     | Plasmid<br>#64324  |                        |



|                                                       |                                                                     |                                                                        |                                            |                                                                             |
|-------------------------------------------------------|---------------------------------------------------------------------|------------------------------------------------------------------------|--------------------------------------------|-----------------------------------------------------------------------------|
| Recombinant DNA reagent                               | pX330.pgkpuro CRISPR plasmid                                        | (Harmsen et al., 2018)                                                 |                                            |                                                                             |
| Recombinant DNA reagent                               | <i>Xenopus</i> Orai1 cDNA                                           | Horizon Discovery Ltd.                                                 | Clone ID: 4633914, Cat# MXL1736-202771770, |                                                                             |
| Transfection construct                                | mCherry- <i>Xenopus</i> WT Orai1 in pmCherry-C1                     | This study                                                             |                                            |                                                                             |
| Transfection construct                                | mCherry- Human WT Orai1 in pmCherry-C1                              | Dr. Matthias Seedorf, Heidelberg University, Germany                   |                                            |                                                                             |
| Transfection construct                                | mCherry- Human WT Orai3 in pmCherry-C1                              | Dr. Matthias Seedorf, Heidelberg University, Germany                   |                                            |                                                                             |
| Transfection construct                                | mCherry- Human Orai1 P245L pmCherry-C1                              | (Bulla et al., 2019)                                                   |                                            |                                                                             |
| Transfection construct                                | mCherry- Human WT Orai2 in pmCherry-C1                              | This study                                                             |                                            |                                                                             |
| Transfection construct                                | Mouse WT Orai1-eGFP in peGFP-N1                                     | Prof. Francisco Javier Martin-Romero, University of Extremadura, Spain |                                            |                                                                             |
| Transfection construct                                | 8X-His-mCherry- <i>Drosophila</i> WT Orai1 in pNmCherry             | (Hou et al., 2018)                                                     |                                            |                                                                             |
| Transfection construct                                | CFP-NFATc1                                                          | (Schober et al., 2019)                                                 |                                            |                                                                             |
| Transfection construct                                | Human STIM1 gRNA1 in pX330.pgkpuro CRISPR plasmid                   | This study                                                             |                                            |                                                                             |
| Transfection construct                                | Human STIM1 gRNA2 in pX330.pgkpuro CRISPR plasmid                   | This study                                                             |                                            |                                                                             |
| Transfection construct                                | Human STIM2 gRNA1 in pX330.pgkpuro CRISPR plasmid                   | This study                                                             |                                            |                                                                             |
| Transfection construct                                | Human STIM2 gRNA2 in pU6-(BbsI)_CBh-Cas9-T2A-mCherry CRISPR plasmid | This study                                                             |                                            |                                                                             |
| Strain, strain background ( <i>Escherichia coli</i> ) | DH5 $\alpha$                                                        | Invitrogen                                                             | Cat # 18265-017                            |                                                                             |
| Sequenced-based reagent                               | H134A primers for mutagenesis of Human Orai1                        | Microsynth AG                                                          | This study                                 | Forward primer: 5'-CAC AGT GCT GGT GGC TGT Ggc CCT GTT TGC GCT CAT GAT C-3' |
| Sequenced-based reagent                               | H108A primers for mutagenesis of Human Orai2                        | Microsynth AG                                                          | This study                                 | Forward primer: 5'-CAC GGT GCT GGT GGC CGT Ggc CCT GTT CGC CCT CCT CAT C-3' |
| Sequenced-based reagent                               | H109A primers for mutagenesis of Human Orai3                        | Microsynth AG                                                          | This study                                 | Forward primer: 5'-CAC CGT GCT GGT GGC TGT Ggc CCT CTT TGC ACT CAT GGT C-3' |

|                         |                                                                                 |               |                                                 |                                                                                                |
|-------------------------|---------------------------------------------------------------------------------|---------------|-------------------------------------------------|------------------------------------------------------------------------------------------------|
| Sequenced-based reagent | L261A-V262N-H264G-K265A (ANSGA) primers for mutagenesis of Human Orai1          | Microsynth AG | This study                                      | Forward primer:<br>5'-GTC CAC TTC TAC CGC TCA gcG aaT AGC ggT gcG ACC GAC CGA CAG TTC C-3'     |
| Sequenced-based reagent | L222A-V223N-H225G-K226A (ANRGA) primers for mutagenesis of Human Orai2          | Microsynth AG | This study (used to generate Human Orai2-ANSGA) | Forward primer:<br>5'-CAT CCA CTT CTA CCG CTC Cgc Gaa tCG Cgg Cgc AAC GGA GCG CCA CAA CC-3'    |
| Sequenced-based reagent | R224S (ANSGA) primers for mutagenesis of Human Orai2-ANRGA                      | Microsynth AG | This study                                      | Forward primer:<br>5'-CTA CCG CTC CGC GAA TaG CGG CGC AAC GGA GCG-3'                           |
| Sequenced-based reagent | L270A-V271N-H273G-K274A (ANAGA) primers for mutagenesis of Human Orai3          | Microsynth AG | This study (used to generate Human Orai3-ANSGA) | Forward primer:<br>5'-CTG CAT TTC TAC CGC TCC gcG aat GCA ggg gcG ACA GAC CGC TAC AAG C-3'     |
| Sequenced-based reagent | A272S (ANSGA) primers for mutagenesis of Human Orai3-ANAGA                      | Microsynth AG | This study                                      | Forward primer:<br>5'-CTA CCG CTC CGC GAA TtC AGG GGC GAC AGA CCG-3'                           |
| Sequenced-based reagent | F187C primers for mutagenesis of Human Orai1                                    | Microsynth AG | This study                                      | Forward primer:<br>5'-CAT TGG CAC GCT GCT CTg CCT AGC TGA GGT GGT GC-3'                        |
| Sequenced-based reagent | F161C primers for mutagenesis of Human Orai2                                    | Microsynth AG | This study                                      | Forward primer:<br>5'-CTT GGC ATC CTA CTC TgC CTG GCC GAG GTG GTG-3'                           |
| Sequenced-based reagent | F162C primers for mutagenesis of Human Orai3                                    | Microsynth AG | This study                                      | Forward primer:<br>5'-CTG GGC ACC TTT CTC TgC CTT GCT GAA GTT GTC-3'                           |
| Sequenced-based reagent | ANSGA primers for mutagenesis of <i>Xenopus</i> Orai1                           | Microsynth AG | This study                                      | Forward primer:<br>5'-GTT CAC TTT TAC AGA TCA gcA aaC AGC ggT gcA ACT GAC CGT CAG TTC C-3'     |
| Sequenced-based reagent | ANSGA primers for mutagenesis of <i>Drosophila</i> Orai                         | Microsynth AG | This study                                      | Forward primer:<br>5'-CAT TCA CTT CTA TCG CTC Cgc Gaa tTC Ggg Cgc ATA TGA GGT GAC AGT CTC G-3' |
| Sequenced-based reagent | V76A primers for mutagenesis of Human Orai2-ANSGA                               | Microsynth AG | This study                                      | Forward primer:<br>5'-CTC TCC GGC TTT GCC ATG GcG GCC ATG GTG GAG GTG CAG-3'                   |
| Sequenced-based reagent | V77A primers for mutagenesis of Human Orai3-ANSGA                               | Microsynth AG | This study                                      | Forward primer:<br>5'-CTC TCG GGC TTC GCC ATG GcG GCC ATG GTG GAG GTG CAG-3'                   |
| Sequenced-based reagent | V174A primers for mutagenesis of <i>Drosophila</i> Orai-ANSGA                   | Microsynth AG | This study                                      | Forward primer:<br>5'-CGG ATT CGC CAT GGc cGC GAT GGT GGA GG-3'                                |
| Sequenced-based reagent | H171Y primers for mutagenesis of Human Orai1/ ANSGA/ V102C/ H134A/ P245L/ F250C | Microsynth AG | This study                                      | Forward primer:<br>5'-GAG CGC ATG CAC CGC tAC ATC GAG CTG GCC TG-3'                            |
| Sequenced-based reagent | H171A primers for mutagenesis of Human Orai1-ANSGA                              | Microsynth AG | This study                                      | Forward primer:<br>5'-CAT GAG CGC ATG CAC CGC gcC ATC GAG CTG GCC TGG GC-3'                    |
| Sequenced-based reagent | H171F primers for mutagenesis of Human Orai1-ANSGA                              | Microsynth AG | This study                                      | Forward primer:<br>5'-CAT GAG CGC ATG CAC CGC ttC ATC GAG CTG GCC TGG GC-3'                    |

|                         |                                                                                       |               |                                                                         |                                                                                                  |
|-------------------------|---------------------------------------------------------------------------------------|---------------|-------------------------------------------------------------------------|--------------------------------------------------------------------------------------------------|
| Sequenced-based reagent | V102C primers for mutagenesis of Human Orai1/ H171Y-ANSGA                             | Microsynth AG | This study                                                              | Forward primer:<br>5'-CTC CGG CTT CGC CAT Gtg cGC<br>AAT GGT GGA GGT GC-3'                       |
| Sequenced-based reagent | A175C primers for mutagenesis of Human Orai1-ANSGA                                    | Microsynth AG | This study                                                              | Forward primer:<br>5'-CAC CGC CAC ATC GAG CTG tgC<br>TGG GCC TTC TCC ACC G-3'                    |
| Sequenced-based reagent | Y258C primers for mutagenesis of Human Orai1-ANSGA/ A175C-ANSGA                       | Microsynth AG | This study                                                              | Forward primer:<br>5'-CTT CGC CGT CCA CTT CTg CCG<br>CTC AGC GAA TAG CG-3'                       |
| Sequenced-based reagent | L174D primers for mutagenesis of Human Orai1-ANSGA                                    | Microsynth AG | This study                                                              | Forward primer:<br>5'-CAC CGC CAC ATC GAG gac GCC<br>TGG GCC TTC TCC-3'                          |
| Sequenced-based reagent | F178A primers for mutagenesis of Human Orai1-ANSGA                                    | Microsynth AG | This study                                                              | Forward primer:<br>5'-GAG CTG GCC TGG GCC gcC TCC<br>ACC GTC ATT GG-3'                           |
| Sequenced-based reagent | F257A primers for mutagenesis of Human Orai1-ANSGA                                    | Microsynth AG | This study                                                              | Forward primer:<br>5'-CGT CTT CGC CGT CCA Cgc CTA<br>CCG CTC AGC GAA TAG-3'                      |
| Sequenced-based reagent | F250C primers for mutagenesis of Human Orai1                                          | Microsynth AG | This study                                                              | Forward primer:<br>5'-CCC TTC GGC CTG ATC TgT ATC<br>GTC TTC GCC GTC-3'                          |
| Sequenced-based reagent | P144R-Y145H primers for mutagenesis of Human Orai2-ANSGA                              | Microsynth AG | This study                                                              | Forward primer:<br>5'-CGC ATG AGC GCA TGC ATC gCc<br>ACA TCG AGC TGG CCT GGG-3'                  |
| Sequenced-based reagent | Y146H primers for mutagenesis of Human Orai3-ANSGA                                    | Microsynth AG | This study                                                              | Forward primer:<br>5'-CCA GAG ACT GCA CCG CcA CGT<br>GGA GCT GGC CTG-3'                          |
| Sequenced-based reagent | T266stop ( $\Delta$ CT) primers for mutagenesis of Human Orai1-ANSGA/ H171Y-ANSGA     | Microsynth AG | This study                                                              | Forward primer:<br>5'-CAG CGA ATA GCG GTG CGt gaG<br>ACC GAC AGT TCC AGG AG-3'                   |
| Sequenced-based reagent | I251V primers for mutagenesis of Human Orai1-ANSGA                                    | Microsynth AG | This study                                                              | Forward primer:<br>5'-CCC TTC GGC CTG ATC TTT gTC<br>GTC TTC GCC GTC CAC-3'                      |
| Sequenced-based reagent | F246V primers for mutagenesis of Human Orai1/ ANSGA/ V102C/ H134A/ ANSGA- $\Delta$ CT | Microsynth AG | This study                                                              | Forward primer:<br>5'-CCA CCA TCA TGG TGC CCg TCG<br>GCC TGA TCT TTA TC-3'                       |
| Sequenced-based reagent | F246C primers for mutagenesis of Human Orai1-ANSGA                                    | Microsynth AG | This study                                                              | Forward primer:<br>5'-CAC CAT CAT GGT GCC CTg CGG<br>CCT GAT CTT TAT CG-3'                       |
| Sequenced-based reagent | F246Y primers for mutagenesis of Human Orai1-ANSGA                                    | Microsynth AG | This study                                                              | Forward primer:<br>5'-CCA CCA TCA TGG TGC CCT aCG<br>GCC TGA TCT TTA TCG TC-3'                   |
| Sequenced-based reagent | A254T-V255I primers for mutagenesis of Human Orai1-ANSGA                              | Microsynth AG | This study                                                              | Forward primer:<br>5'-GCC TGA TCT TTA TCG TCT TCa<br>CCa TCC ACT TCT ACC GCT CAG<br>CG-3'        |
| Sequenced-based reagent | F246V-I251V primers for mutagenesis of Human Orai1-ANSGA                              | Microsynth AG | This study (used to generate Human Orai1-F246V-I251V-A254T-V255I-ANSGA) | Forward primer:<br>5'-CAC CAT CAT GGT GCC CgT CGG<br>CCT GAT CTT TgT CGT CTT CGC<br>CGT CCA C-3' |

|                         |                                                                            |               |            |                                                                                                  |
|-------------------------|----------------------------------------------------------------------------|---------------|------------|--------------------------------------------------------------------------------------------------|
| Sequenced-based reagent | A254T-V255I primers for mutagenesis of Human Orai1-F246V-I251V-ANSGA       | Microsynth AG | This study | Forward primer:<br>5'-GCC TGA TCT TTG TCG TCT TCa CCa TCC ACT TCT ACC GCT CAG CG-3'              |
| Sequenced-based reagent | I249V-V252A-V255L primers for mutagenesis of Human Orai1-ANSGA             | Microsynth AG | This study | Forward primer:<br>5'-GGT GCC CTT CGG CCT GgT CTT TAT CGc CTT CGC CcT CCA CTT CTA CCG CTC-3'     |
| Sequenced-based reagent | F246V-I251V primers for mutagenesis of Human Orai1-I249V-V252A-V255L-ANSGA | Microsynth AG | This study | Forward primer:<br>5'-CAC CAT CAT GGT GCC CgT CGG CCT GGT CTT TgT CGC CTT CGC CCT CCA C-3'       |
| Sequenced-based reagent | I249V primers for mutagenesis of Human Orai1-ANSGA                         | Microsynth AG | This study | Forward primer:<br>5'-CAT GGT GCC CTT CGG CCT GgT CTT TAT CGT CTT CGC CGT C-3'                   |
| Sequenced-based reagent | V252A primers for mutagenesis of Human Orai1-ANSGA                         | Microsynth AG | This study | Forward primer:<br>5'-CGG CCT GAT CTT TAT CGc CTT CGC CGT CCA CTT C-3'                           |
| Sequenced-based reagent | V255L primers for mutagenesis of Human Orai1-ANSGA                         | Microsynth AG | This study | Forward primer:<br>5'-GAT CTT TAT CGT CTT CGC CcT CCA CTT CTA CCG CTC AGC-3'                     |
| Sequenced-based reagent | V255L primers for mutagenesis of Human Orai1-I249V-ANSGA                   | Microsynth AG | This study | Forward primer:<br>5'-CGG CCT GGT CTT TAT CGT CTT CGC CcT CCA CTT C-3'                           |
| Sequenced-based reagent | P206C primers for mutagenesis of Human Orai2                               | Microsynth AG | This study | Forward primer:<br>5'-CCA CCA TCA TCA TGG TgT gCG TGG GCC TCA TCT TCG-3'                         |
| Sequenced-based reagent | F211C primers for mutagenesis of Human Orai2                               | Microsynth AG | This study | Forward primer:<br>5'-CCC GTG GGC CTC ATC TgC GTG GTC TTC ACC ATC-3'                             |
| Sequenced-based reagent | P254C primers for mutagenesis of Human Orai3                               | Microsynth AG | This study | Forward primer:<br>5'-CCA CAG CCA TCA TGG Tat gCG TGG GGC TCG TGT TTG-3'                         |
| Sequenced-based reagent | F259C primers for mutagenesis of Human Orai3                               | Microsynth AG | This study | Forward primer:<br>5'-CCC GTG GGG CTC GTG TgT GTG GCC TTT GCC CTG-3'                             |
| Sequenced-based reagent | F246V primers for mutagenesis of Human Orai1-P245L                         | Microsynth AG | This study | Forward primer:<br>5'-CCA CCA TCA TGG TGC TCg TCG GCC TGA TCT TTA TC-3'                          |
| Sequenced-based reagent | F246V primers for mutagenesis of Human Orai1-F250C                         | Microsynth AG | This study | Forward primer:<br>5'-CCA CCA TCA TGG TGC CCg TCG GCC TGA TCT GTA TC-3'                          |
| Sequenced-based reagent | V207F-V212I primers for mutagenesis of Human Orai2-P144R-Y145H-ANSGA       | Microsynth AG | This study | Forward primer:<br>5'-CCA TCA TCA TGG TGC CcT TcG GCC TCA TCT TCa TcG TCT TCA CCA TCC ACT TC-3'  |
| Sequenced-based reagent | V255F-V260I-A261V primers for mutagenesis of Human Orai3-Y146H-ANSGA       | Microsynth AG | This study | Forward primer:<br>5'-CAG CCA TCA TGG TAC CcT TcG GGC TCG TGT TTa TcG tCT TTG CCC TGC ATT TCT-3' |
| Sequenced-based reagent | Primers to remove C-terminal eGFP tag from Mouse WT Orai1 in peGFP-N1      | Microsynth AG | This study | Forward primer:<br>5'-GGG CAC CCA CTA TGC Cta GGA TCC ACC GGT CGC C-3'                           |
| Sequenced-based reagent | L264A-V265N-H267G-K268A (ANSGA) primers for mutagenesis of Mouse Orai1     | Microsynth AG | This study | Forward primer:<br>5'-GTT CAC TTC TAC CGt TCC gcG aat AGC ggT gcG ACG GAC CGG CAG TTC CAG-3'     |

|                         |                                                           |                         |                  |                                                                                |
|-------------------------|-----------------------------------------------------------|-------------------------|------------------|--------------------------------------------------------------------------------|
| Sequenced-based reagent | C249F primers for mutagenesis of mouse Orai1 WT and ANSGA | Microsynth AG           | This study       | Forward primer:<br>5'-CCG CCA TCA TGG TTC CCT tTG<br>GCC TGG TTT TTA TCG TC-3' |
| Sequenced-based reagent | Human STIM1 gRNA1 primer for cloning in CRISPR plasmid    | Microsynth AG           | This study       | Forward primer:<br>5'-CAC CGT TCT GTG CCC GCG<br>GAG ACT C-3'                  |
| Sequenced-based reagent | Human STIM1 gRNA1 primer for cloning in CRISPR plasmid    | Microsynth AG           | This study       | Reverse primer:<br>5'-AAA CGA GTC TCC GCG GGC<br>ACA GAA C-3'                  |
| Sequenced-based reagent | Human STIM1 gRNA2 primer for cloning in CRISPR plasmid    | Microsynth AG           | This study       | Forward primer:<br>5'-CAC CGT ATG CGT CCG TCT TGC<br>CCT G-3'                  |
| Sequenced-based reagent | Human STIM1 gRNA2 primer for cloning in CRISPR plasmid    | Microsynth AG           | This study       | Reverse primer:<br>5'-AAA CCA GGG CAA GAC GGA<br>CGC ATA C-3'                  |
| Sequenced-based reagent | Human STIM2 gRNA1 primer for cloning in CRISPR plasmid    | Microsynth AG           | This study       | Forward primer:<br>5'-CAC CGC GGA ACC AAT GAA<br>CGC AGC C-3'                  |
| Sequenced-based reagent | Human STIM2 gRNA1 primer for cloning in CRISPR plasmid    | Microsynth AG           | This study       | Reverse primer:<br>5'-AAA CGG CTG CGT TCA TTG GTT<br>CCG C-3'                  |
| Sequenced-based reagent | Human STIM2 gRNA2 primer for cloning in CRISPR plasmid    | Microsynth AG           | This study       | Forward primer:<br>5'-CAC CGC TGG TAG CCG GAG<br>CGG CGG A-3'                  |
| Sequenced-based reagent | Human STIM2 gRNA2 primer for cloning in CRISPR plasmid    | Microsynth AG           | This study       | Reverse primer:<br>5'-AAA CTC CGC CGC TCC GGC TAC<br>CAG C-3'                  |
| Antibody                | Guinea pig polyclonal for Human STIM1                     | (Ercan et al., 2012)    |                  |                                                                                |
| Antibody                | Goat anti-guinea pig secondary antibody                   | Jackson Immuno Research | Cat# 106-035-003 |                                                                                |
| Antibody                | Rabbit polyclonal for Human STIM2                         | Cell Signaling          | Cat# 4917S       |                                                                                |
| Antibody                | Goat anti-rabbit secondary                                | Promega                 | Cat# W401B       |                                                                                |
| Antibody                | Mouse monoclonal for Tubulin                              | Sigma-Aldrich           | Cat# T9028       |                                                                                |
| Antibody                | Goat anti-mouse secondary                                 | Bio-Rad                 | Cat# 172-1011    |                                                                                |
| Software, algorithm     | ScreenWorks 3.1.1.8                                       | Molecular Devices, LLC  |                  |                                                                                |
| Software, algorithm     | GraphPad Prism 9.1.0                                      | GraphPad Software, LLC  |                  |                                                                                |
| Software, algorithm     | PyMol                                                     | Schrödinger             |                  |                                                                                |
| Software, algorithm     | PatchMaster                                               | HEKA Elektronik         |                  |                                                                                |
